# Supplementary material for: De NovoTranscriptome Assembly and Differential Gene Expression Profiling of ThreeCapra hircusSkin Types during Anagen of the Hair Growth Cycle
Source: Hindawi journal article supplement (doi:10.1155/2013/269191), 2013-01-01

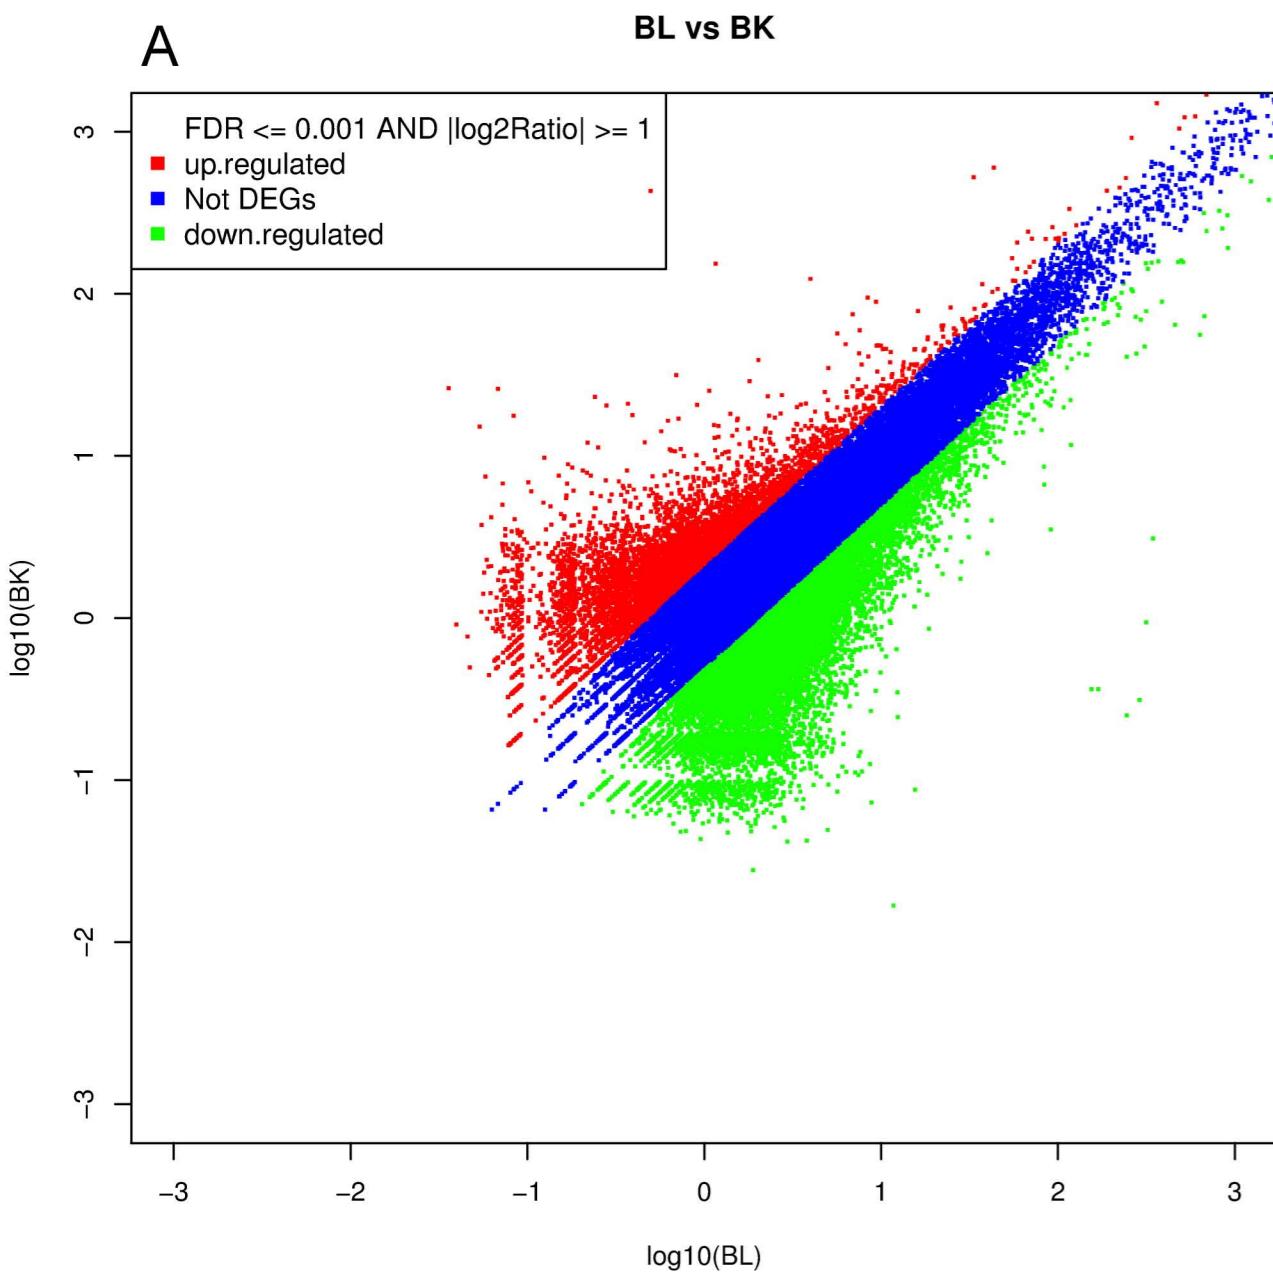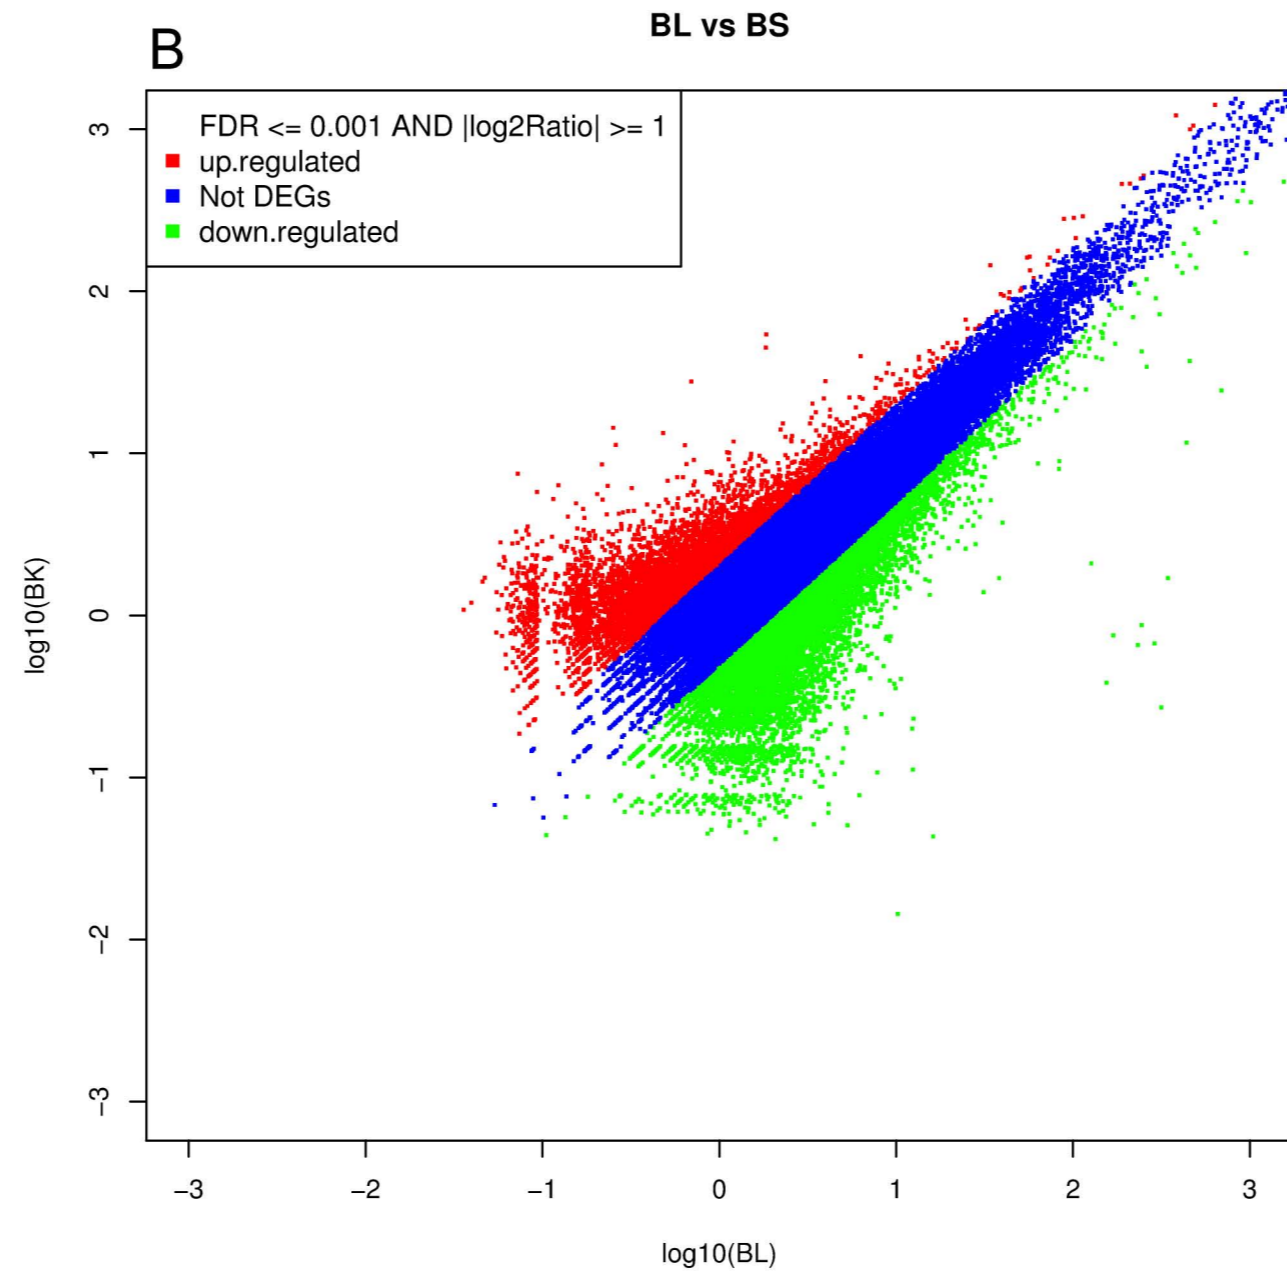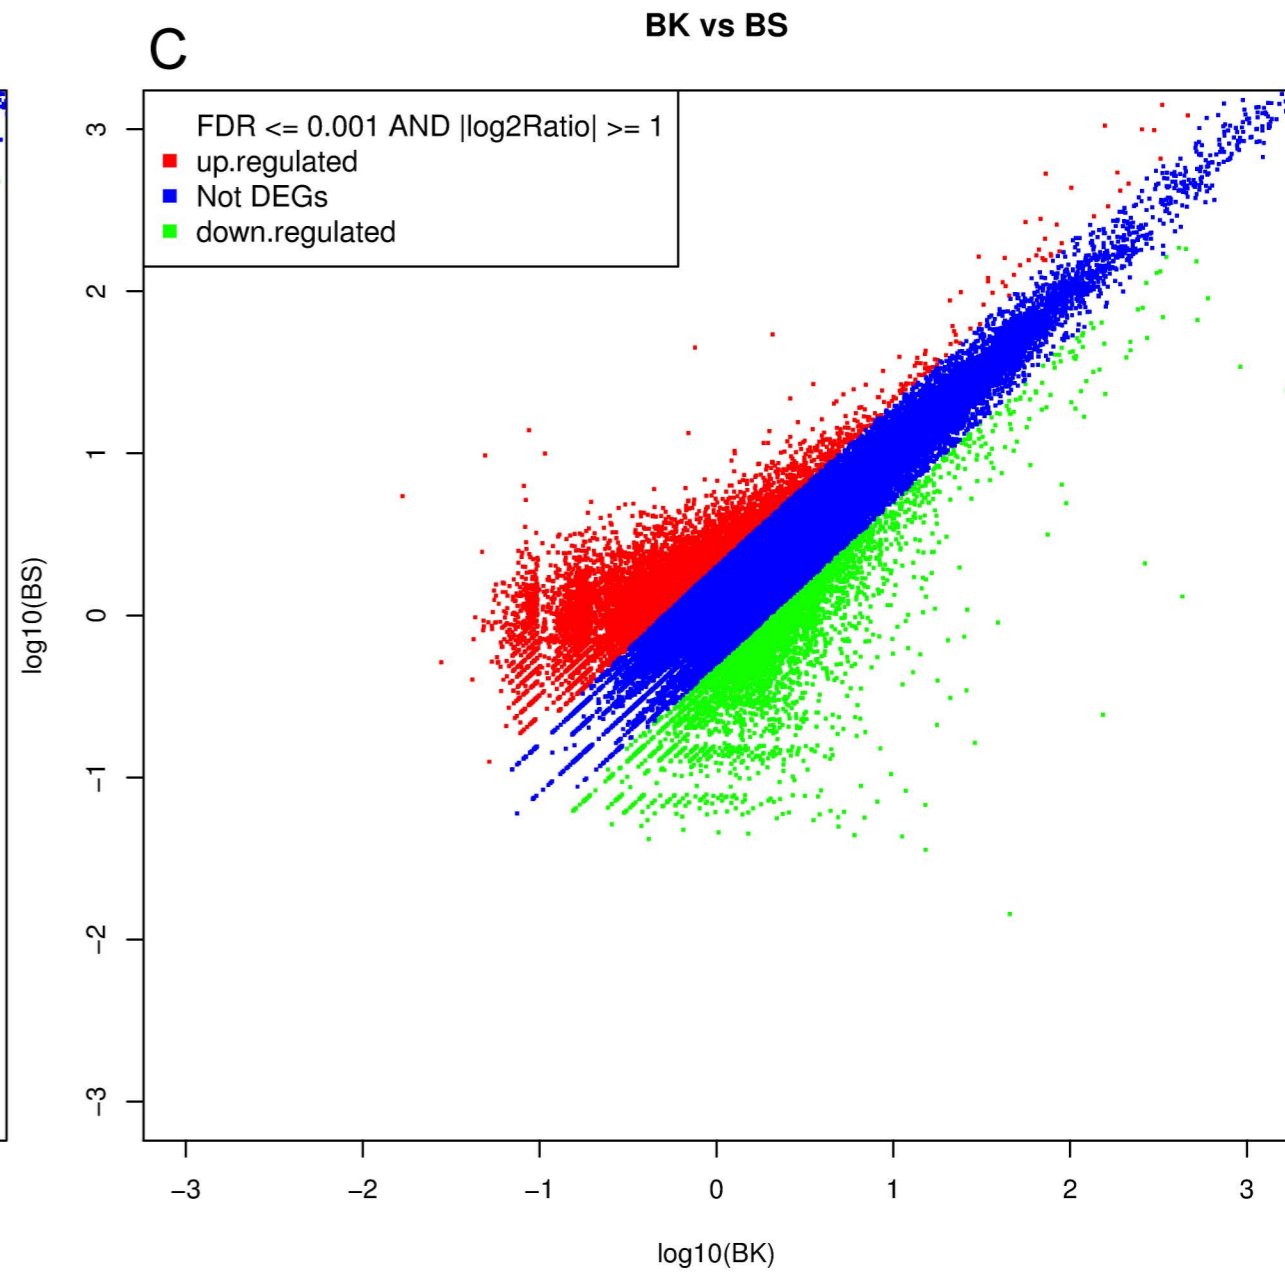

Supplement: f1 [file 269191.f1.pdf]
