# Supplementary material for: De Novo Transcriptome Assembly and Differential Gene Expression Profiling of Three Capra hircus Skin Types during Anagen of the Hair Growth Cycle
Source: Int J Genomics. 2013 May 20;2013:269191. doi: 10.1155/2013/269191 (PMC3671518; doi:10.1155/2013/269191)
Supplement: Supplementary file 2 [file 269191.f2.xls]

## Sheet: Sheet1
Table S1. Validation of putative full length CDS by RT-PCR amplification and PCR product Sanger sequencing. The sequences were aligned with de novo assembled contigs using BLASTN.
Contig ID	RT-PCR	putative CDS length	Aligned length	Positives	identity(%)
a24773;64	+	426	373	366	98.12
a51507;20	+	411	350	349	99.71
a26744;51	+	615	556	556	100
a113908;10	+	402	343	343	100
a25791;50	+	420	359	359	100
a44640;23	+	540	482	482	100
a36274;31	+	390	343	342	99.71
a42514;36	+	357	311	311	100
a121470;10	+	376	317	315	99.37
a76422;21	﹣	360	/	/	/
