# Supplementary material for: De Novo Transcriptome Assembly and Differential Gene Expression Profiling of Three Capra hircus Skin Types during Anagen of the Hair Growth Cycle
Source: Int J Genomics. 2013 May 20;2013:269191. doi: 10.1155/2013/269191 (PMC3671518; doi:10.1155/2013/269191)
Supplement: Supplementary file 3 [file 269191.f3.xls]

## Sheet: Sheet1
Table S2. Validation of ten sequences assembly by identifying the genes specific to hair cycling using RT-PCR. Sequencing depth was calculated through the cumulative nucleotide length of total mapped reads on the certain gene divided by gene size.
Contig ID	TSA accession	RT-PCR	Total sequencing depth (fold)	Product name	Best hit accession	Identity (%)	Whether full length CDS
a46327;17	KA327025	+	23.7	Wnt-2	NP_001013019	100	Yes
a17575;81	KA350506	+	111.86	Wnt-7	XP_538327	99.32	No
a10037;118	KA318103	+	159.47	Frizzled-7	XP_002919185	48.3	No
a1419;1020	KA340496	+	1442.82	β-catenin	NP_999532	100	Yes
a81885;17	KA308840	+	22.44	IGF-1	BAD92421	94.61	No
a7066;191	KA352700	+	274.49	IGF-1R	DAA17722	99.41	Yes
a39985;38	KA353246	+	52.69	FGF-21	DAA19765	99.04	Yes
a8349;161	KA335417	+	222.11	FGF-2R	EAW49345	96.4	No
a6199;208	KA326754	+	295.74	EGFR	NP_999172	87.54	No
a25223;50	KA325286	+	69.95	TGFβ-2	NP_001106723	99.76	Yes
