# Supplementary material for: De Novo Transcriptome Assembly and Differential Gene Expression Profiling of Three Capra hircus Skin Types during Anagen of the Hair Growth Cycle
Source: Int J Genomics. 2013 May 20;2013:269191. doi: 10.1155/2013/269191 (PMC3671518; doi:10.1155/2013/269191)
Supplement: Supplementary file 4 [file 269191.f4.xls]

## Sheet: Sheet1
Table S3. Codon usage of goat. 23039 predicted CDSs were used for analysis.
Codon	Animo Acid	Frequency	Ratio (%)
UUU	Phe	93328	1.41
UCU	Ser	87224	1.32
UAU	Tyr	64111	0.97
UGU	Cys	57892	0.88
UUC	Phe	133775	2.03
UCC	Ser	119279	1.81
UAC	Tyr	105756	1.6
UGC	Cys	82640	1.25
UUA	Leu	41663	0.63
UCA	Ser	68902	1.04
UAA	TER	2605	0.04
UGA	TER	6112	0.09
UUG	Leu	76838	1.16
UCG	Ser	38321	0.58
UAG	TER	2638	0.04
UGG	Trp	78187	1.18
CUU	Leu	74907	1.13
CCU	Pro	108208	1.64
CAU	His	59045	0.89
CGU	Arg	30328	0.46
CUC	Leu	134924	2.04
CCC	Pro	144678	2.19
CAC	His	109539	1.66
CGC	Arg	80415	1.22
CUA	Leu	37578	0.57
CCA	Pro	101466	1.54
CAA	Gln	66957	1.01
CGA	Arg	44194	0.67
CUG	Leu	291917	4.42
CCG	Pro	61134	0.93
CAG	Gln	251308	3.81
CGG	Arg	93762	1.42
AUU	Ile	86032	1.3
ACU	Thr	73521	1.11
AAU	Asn	90726	1.37
AGU	Ser	74941	1.14
AUC	Ile	141229	2.14
ACC	Thr	127379	1.93
AAC	Asn	132272	2
AGC	Ser	143126	2.17
AUA	Ile	38561	0.58
ACA	Thr	85089	1.29
AAA	Lys	140898	2.13
AGA	Arg	69209	1.05
AUG	Met	140429	2.13
ACG	Thr	53868	0.82
AAG	Lys	226091	3.42
AGG	Arg	77091	1.17
GUU	Val	64270	0.97
GCU	Ala	118029	1.79
GAU	Asp	136222	2.06
GGU	Gly	65873	1
GUC	Val	103186	1.56
GCC	Ala	210258	3.18
GAC	Asp	194078	2.94
GGC	Gly	164679	2.49
GUA	Val	39506	0.6
GCA	Ala	98476	1.49
GAA	Glu	181600	2.75
GGA	Gly	99151	1.5
GUG	Val	200674	3.04
GCG	Ala	64188	0.97
GAG	Glu	298145	4.52
GGG	Gly	113758	1.72
