# Supplementary material for: De Novo Transcriptome Assembly and Differential Gene Expression Profiling of Three Capra hircus Skin Types during Anagen of the Hair Growth Cycle
Source: Int J Genomics. 2013 May 20;2013:269191. doi: 10.1155/2013/269191 (PMC3671518; doi:10.1155/2013/269191)
Supplement: Supplementary file 5 [file 269191.f5.xls]

## Sheet: Sheet1
Table S4. Gene functional annotation and expression profiles of belly(BL),back(BK) and body side(BS) skin of the cashmere goat during anagen phase. The p-value, q-value and 2 based logarithms of RPKM ratio from corresponding libraries of 49,115 uni-sequences were listed below. "NA" represents no hits in the NR database.
Contig ID	Contig size (bp)	Contig mapped reads number from BL	Contig mapped reads number from BK	Contig mapped reads number from BS	p-value between BL and BK	q-value between BL and BK	2 based logarithm of RPKM-BK/RPKM-BL	p-value between BL and BS	q-value between BL and BS	2 based logarithm of RPKM-BS/RPKM-BL	BLASTX top hit description in NR database
a10000;99	1322	955	385	507	3.2312e-51	7.67086e-50	-1.24598	5.5513e-52	1.43585e-50	-1.16539	NA
a100012;14	369	2	27	38	6.03419e-05	0.000160032	3.81955	4.84342e-05	0.000151105	3.99605	NA
a100015;16	674	57	20	60	2.29171e-05	6.59466e-05	-1.4463	0.250331	0.293175	-0.177876	NA
a100016;12	517	21	40	24	0.00459368	0.00851941	0.99427	0.439292	0.453907	-0.0592317	NA
a100017;10	753	59	24	20	0.000120756	0.000304067	-1.23302	8.98353e-08	4.20762e-07	-1.81259	PREDICTED: hypothetical protein [Bos taurus]
a100021;9	595	9	36	34	1.2354e-05	3.73016e-05	2.06466	0.000460637	0.00117624	1.66566	NA
a100023;15	324	14	31	26	0.00365036	0.00691271	1.2115	0.0922405	0.127547	0.641208	Mitotic checkpoint serine/threonine-protein kinase BUB1 beta; AltName: Full=MAD3/BUB1-related protein kinase; Short=hBUBR1; AltName: Full=Mitotic checkpoint kinase MAD3L; AltName: Full=Protein SSK1
a100025;6	656	13	9	23	0.234345	0.271889	-0.465855	0.131271	0.172032	0.571245	PREDICTED: bullous pemphigoid antigen 1, isoforms 6/9/10-like [Macaca mulatta]
a100028;15	557	46	39	27	0.292451	0.326762	-0.1735	0.00149492	0.00341166	-1.02055	NA
a100038;12	386	34	5	12	1.34976e-06	4.69429e-06	-2.70088	5.70707e-05	0.000175255	-1.75438	NA
a100053;16	312	25	6	33	0.000420305	0.000952876	-1.99423	0.355561	0.386565	0.148661	NA
a10005;136	4368	2285	2434	3762	0.000104261	0.00026467	0.155794	0	0	0.467429	pleckstrin homology domain containing, family A member 5-like [Bos taurus]
a100060;14	644	40	31	51	0.192073	0.230162	-0.303073	0.378346	0.405627	0.0986205	angel-like [Bos taurus]
a100064;12	518	31	20	30	0.0858175	0.115224	-0.567609	0.207082	0.250229	-0.299182	NA
a10007;121	2169	1851	716	1098	1.78132e-104	6.45719e-103	-1.30561	5.05526e-78	1.61656e-76	-1.0053	rab-3A-interacting protein [Bos taurus]
a10008;159	1210	1058	722	924	9.43178e-13	6.52585e-12	-0.48661	2.67635e-12	2.04411e-11	-0.447252	NA
a100106;10	556	9	49	20	1.79106e-06	6.12094e-06	2.50944	0.0604682	0.0889471	0.900126	NA
a100124;14	400	20	29	33	0.0759377	0.103691	0.600712	0.128154	0.168482	0.470589	envelope glycoprotein [Ovis aries]
a10012;112	2103	1094	992	1293	0.11322	0.146647	-0.0765415	0.427006	0.44498	-0.0107672	proline rich 12 [Bos taurus]
a100132;10	456	19	17	12	0.424291	0.441042	-0.0958054	0.0413503	0.0642166	-0.914842	NA
a100136;13	616	43	29	32	0.0734893	0.100571	-0.503625	0.0214289	0.0363285	-0.678142	NA
a100139;10	627	69	3	4	3.03382e-17	3.03123e-16	-4.4589	1.51725e-19	1.94682e-18	-4.3604	NA
a10013;122	949	337	599	688	0	0	0.894467	0	0	0.777783	bolA-like protein 1 [Bos taurus]
a100144;15	1433	116	86	96	0.0367604	0.0548447	-0.367057	0.00407877	0.0084108	-0.524895	zinc finger, MYM-type 4 [Bos taurus]
a10015;85	2835	1476	972	918	3.90033e-20	4.4142e-19	-0.538005	6.28986e-56	1.70031e-54	-0.937003	PREDICTED: similar to Mitochondrial precursor proteins import receptor (Translocase of outer membrane TOM70) [Canis familiaris]
a10016;80	2176	827	739	954	0.0906672	0.121033	-0.0976537	0.251405	0.294285	-0.0457748	endothelin-1 receptor precursor [Ovis aries]
a100170;11	1017	26	71	64	6.27861e-07	2.27638e-06	1.51397	0.000635962	0.00158299	1.04768	toll-like receptor 8 [Bubalus bubalis]
a100176;18	321	14	32	38	0.00249953	0.00489131	1.2573	0.00319107	0.00675847	1.1887	NA
a100181;9	395	9	20	28	0.0158449	0.025916	1.21666	0.00442115	0.00902456	1.38555	NA
a100182;16	535	34	17	51	0.013396	0.0223087	-0.935341	0.151544	0.193301	0.333086	PREDICTED: LOW QUALITY PROTEIN: spectrin beta chain, brain 1-like [Pongo abelii]
a100201;15	698	43	37	49	0.32129	0.352946	-0.152152	0.412523	0.432821	-0.0634317	NA
a100208;9	1001	83	20	17	3.3939e-10	1.75568e-09	-1.98845	7.4224e-15	7.63185e-14	-2.53945	PREDICTED: hypothetical protein isoform 1 [Bos taurus]
a10020;130	947	833	376	472	2.486e-36	4.58189e-35	-1.08292	4.79748e-40	1.04036e-38	-1.07141	NA
a10021;165	1749	1367	1350	1259	0.199821	0.237952	0.0466054	2.35463e-11	1.60542e-10	-0.370612	probable histone acetyltransferase MYST1 [Bos taurus]
a100227;13	569	33	39	31	0.185699	0.224124	0.305667	0.170063	0.213178	-0.342075	alpha-actinin-3 [Bos taurus]
a100233;11	303	8	16	10	0.0426608	0.0624127	1.06466	0.471135	0.47846	0.0700513	NA
a100238;17	316	40	8	19	2.05318e-06	6.96321e-06	-2.25727	0.000325664	0.000857371	-1.32588	NA
a10023;140	1596	897	773	1445	0.0170419	0.027584	-0.14998	1.50213e-13	1.38401e-12	0.436013	RecName: Full=Protein FAM110A
a100258;11	1147	97	35	34	8.72221e-08	3.53962e-07	-1.40597	2.33726e-11	1.59413e-10	-1.76433	PREDICTED: EGF-like-domain, multiple 6 [Bos taurus]
a100265;11	542	25	30	21	0.201597	0.239704	0.327694	0.118202	0.157061	-0.503416	NA
a100268;16	665	75	36	27	0.000244962	0.000584037	-0.994234	6.27177e-09	3.35428e-08	-1.72581	KIAA0744 protein [Homo sapiens]
a10027;124	2343	1334	1111	1653	0.000331378	0.000766428	-0.199241	0.139988	0.181519	0.0574513	PREDICTED: protein arginine N-methyltransferase 5 isoform 4 [Macaca mulatta]
a100288;14	741	85	21	36	3.39135e-10	1.75482e-09	-1.95241	2.49943e-08	1.24668e-07	-1.49134	NA
a10029;76	3648	1245	1170	1543	0.335589	0.365017	-0.024978	0.147226	0.189156	0.0577156	PREDICTED: dual-specificity tyrosine-(Y)-phosphorylation regulated kinase 2-like [Bos taurus]
a10030;151	674	551	448	411	0.00535932	0.00976986	-0.233894	2.5049e-13	2.2419e-12	-0.674791	hypothetical protein LOC615081 [Bos taurus]
a10031;142	2831	954	2552	2259	4.80394e-13	3.44945e-12	1.48423	8.66529e-13	7.19138e-12	0.991746	RecName: Full=Integrin beta-2; AltName: Full=Cell surface adhesion glycoproteins LFA-1/CR3/p150,95 subunit beta; AltName: Full=Complement receptor C3 subunit beta; AltName: CD_antigen=CD18; Flags: Precursor
a100346;15	429	22	11	42	0.0385098	0.0570243	-0.935341	0.0360221	0.0571094	0.681009	hCG2042613 [Homo sapiens]
a100357;13	435	42	10	17	5.80904e-06	1.83585e-05	-2.00573	4.02342e-05	0.000127622	-1.55673	NA
a10035;125	742	508	223	420	3.5431e-24	4.68452e-23	-1.12313	1.43955e-08	7.39699e-08	-0.526316	NA
a10036;94	1002	605	325	395	5.21596e-18	5.40387e-17	-0.831836	2.3336e-21	3.18748e-20	-0.866959	NA
a10037;118	982	557	215	794	5.64648e-33	9.57348e-32	-1.30868	0.000545548	0.00137508	0.259585	PREDICTED: frizzled-7-like [Ailuropoda melanoleuca]
a100382;9	785	39	29	35	0.154326	0.190829	-0.362762	0.111306	0.149647	-0.407996	purinergic receptor P2X, ligand-gated ion channel, 7 [Bos taurus]
a100396;15	331	15	5	42	0.0171939	0.0278016	-1.5203	0.00155257	0.0035333	1.23355	dipeptidase 2 [Bos taurus]
a1003;1694	891	4385	8199	7984	4.73632e-12	2.95077e-11	0.96753	3.5697e-12	2.67608e-11	0.612658	phospholipid hydroperoxide glutathione peroxidase, mitochondrial precursor [Bos taurus]
a100403;11	311	22	4	10	0.000238174	0.000568833	-2.39477	0.00455316	0.00926841	-1.38938	NA
a100414;12	447	21	21	16	0.441251	0.455103	0.0646592	0.0882684	0.123128	-0.644194	NA
a100418;14	567	33	33	39	0.426966	0.443494	0.0646592	0.481959	0.486835	-0.0108687	PREDICTED: hypothetical protein [Bos taurus]
a100429;13	449	32	19	25	0.0496841	0.0713073	-0.687413	0.056376	0.084012	-0.608021	FYVE, RhoGEF and PH domain containing 6 [Bos taurus]
a10044;105	2031	875	1079	1029	1.02346e-08	4.60224e-08	0.366999	0.392163	0.41704	-0.0179887	NA
a10045;104	2388	1329	1371	802	0.0242573	0.0378172	0.109547	2.10849e-54	5.61327e-53	-0.980544	CKLF-like MARVEL transmembrane domain-containing protein 3 [Bos taurus]
a100460;18	355	16	64	17	3.44026e-08	1.46245e-07	2.06466	0.366468	0.395487	-0.164414	NA
a10046;113	910	424	544	477	2.59986e-06	8.68294e-06	0.424202	0.196591	0.240592	-0.0819517	zinc transporter 5 [Bos taurus]
a100470;12	1823	122	33	145	7.72278e-13	5.40507e-12	-1.82168	0.491085	0.493163	-0.002705	nucleoporin 205kDa [Bos taurus]
a100471;16	927	53	41	110	0.155511	0.191866	-0.305709	0.000348108	0.000909585	0.801563	IQ motif containing GTPase activating protein 3 [Bos taurus]
a100474;14	455	62	20	2	3.18113e-06	1.04698e-05	-1.56761	2.20037e-19	2.79632e-18	-5.20607	LYR motif-containing protein 5 [Bos taurus]
a100477;14	365	14	29	25	0.00759649	0.0134063	1.11529	0.115827	0.154871	0.584625	NA
a100478;12	420	30	12	22	0.00418691	0.00782753	-1.25727	0.041211	0.0640509	-0.699336	NA
a100479;14	1552	136	75	108	4.94185e-05	0.000133664	-0.793985	0.000797731	0.0019375	-0.584452	Dedicator of cytokinesis 5-like [Bos taurus]
a100480;15	400	25	15	25	0.0774065	0.105365	-0.672306	0.265634	0.30703	-0.251877	Rap guanine nucleotide exchange factor (GEF) 6 isoform 4 [Bos taurus]
a100481;13	409	27	15	24	0.0453507	0.066051	-0.783338	0.147397	0.189312	-0.421802	NA
a100482;13	323	13	22	16	0.0505998	0.0725102	0.823651	0.47389	0.480136	0.0476835	transient receptor potential cation channel, subfamily M, member 6 [Bos taurus]
a100483;17	370	26	23	27	0.395703	0.415675	-0.112219	0.305702	0.342983	-0.197429	NA
a100487;14	384	32	14	23	0.00617284	0.0111265	-1.12799	0.0315454	0.0508424	-0.728315	NA
a100491;14	482	21	34	26	0.0280525	0.0431175	0.759805	0.454427	0.465865	0.0562455	NA
a100494;15	327	28	14	17	0.0225448	0.0355115	-0.935341	0.0132171	0.0237137	-0.971769	NA
a100499;12	747	77	18	31	8.43571e-10	4.20783e-09	-2.0322	3.85098e-08	1.88728e-07	-1.56447	NA
a1004;863	1852	10936	5235	6455	0	0	-0.998164	0	0	-1.01247	trafficking protein particle complex subunit 4 [Bos taurus]
a100501;14	389	4	33	28	2.52143e-05	7.18624e-05	3.10905	5.97743e-05	0.000182581	2.55548	NA
a100507;13	539	22	42	32	0.00370715	0.00701403	0.997545	0.241103	0.284648	0.288692	NA
a100509;22	365	17	55	34	1.0766e-06	3.78664e-06	1.75856	0.0400199	0.0624249	0.748123	NA
a100514;17	409	12	36	43	0.000130467	0.000326928	1.64962	0.000147099	0.000416427	1.58943	NA
a100519;14	527	66	4	21	1.76549e-15	1.59275e-14	-3.97973	5.56351e-09	2.9921e-08	-1.90395	NA
a10051;158	1960	1523	999	1800	4.43518e-21	5.22917e-20	-0.5437	0.414146	0.434297	-0.0107958	lymphoid enhancer-binding factor 1 [Bos taurus]
a100521;12	345	0	42	12	4.30767e-14	3.54383e-13	0/unlimited	0.000361387	0.000942677	0/unlimited	NA
a100523;14	516	46	18	25	0.000407615	0.000926887	-1.28898	0.000621025	0.00154714	-1.13158	NA
a100526;12	727	36	36	63	0.423827	0.440676	0.0646592	0.0323685	0.0519304	0.555478	NA
a100528;15	358	22	11	28	0.0385098	0.0570243	-0.935341	0.414922	0.434911	0.0960466	NA
a10052;132	945	449	349	972	0.00181065	0.00363417	-0.298829	5.04818e-13	4.33036e-12	0.862364	cyclin-dependent kinase 4 inhibitor B [Bos taurus]
a100539;16	372	20	24	32	0.227646	0.265326	0.327694	0.154227	0.195823	0.426195	NA
a10053;59	5877	1813	1440	1735	6.85159e-08	2.81173e-07	-0.267651	3.82268e-11	2.56051e-10	-0.31532	transmembrane protein 131 [Bos taurus]
a100540;14	524	50	22	28	0.000885641	0.00189811	-1.11977	0.000550664	0.00138744	-1.08838	NA
a100552;10	367	8	30	16	8.89658e-05	0.000229195	1.97155	0.120482	0.159553	0.748123	NA
a100556;15	351	14	26	30	0.021318	0.0337806	0.957744	0.0339129	0.0542213	0.847659	tyrosine-protein kinase Lck [Ovis aries]
a100558;11	759	26	50	20	0.0015854	0.00322778	1.00808	0.07	0.100941	-0.630388	PREDICTED: similar to Probable tubulin polyglutamylase TTLL10 (Tubulin--tyrosine ligase-like protein 10) [Equus caballus]
a100563;11	578	15	14	58	0.476748	0.480717	-0.0348764	4.77741e-06	1.76933e-05	1.69921	NA
a100566;13	357	14	12	19	0.394976	0.415062	-0.157733	0.364724	0.394332	0.188696	SRY (sex determining region Y)-box 7 [Bos taurus]
a100567;16	366	18	12	37	0.170386	0.20798	-0.520303	0.0278923	0.0457235	0.787652	NA
a100568;15	341	29	20	18	0.13236	0.167528	-0.471394	0.0139808	0.0249427	-0.939933	NA
a100575;17	384	9	28	28	0.000517871	0.00115669	1.70209	0.00442115	0.00902456	1.38555	NA
a10057;123	1527	881	831	895	0.389495	0.409943	-0.0196343	0.000410401	0.00105861	-0.229131	pleckstrin-2 [Bos taurus]
a100581;12	303	37	4	4	6.0216e-08	2.48587e-07	-3.14479	1.2174e-09	6.99862e-09	-3.46133	NA
a100582;15	854	92	34	55	2.98982e-07	1.13449e-06	-1.37144	1.93373e-05	6.49043e-05	-0.994079	PREDICTED: AT-rich interactive domain-containing protein 2-like [Pongo abelii]
a100583;12	1003	63	49	65	0.140217	0.175963	-0.297911	0.207064	0.250254	-0.206789	Col2a1a protein [Danio rerio]
a100585;14	481	39	22	27	0.0230794	0.0362669	-0.761311	0.0144854	0.0257666	-0.782391	NA
a100587;14	343	57	2	8	5.49558e-15	4.81591e-14	-4.76823	8.67188e-13	7.19138e-12	-3.08477	NA
a100590;11	720	36	52	24	0.0280354	0.0430966	0.595174	0.0131343	0.0235832	-0.836839	NA
a100592;9	673	54	13	20	3.50554e-07	1.31499e-06	-1.98979	1.06346e-06	4.32069e-06	-1.68484	low-density lipoprotein receptor-related protein 2-like [Bos taurus]
a100593;13	454	58	2	17	2.90287e-15	2.5896e-14	-4.79332	1.26258e-08	6.52794e-08	-2.02239	NA
a100595;12	884	44	36	66	0.246172	0.283176	-0.224847	0.119667	0.158707	0.333086	RecName: Full=Muscle-related coiled-coil protein; AltName: Full=Muscle-restricted coiled-coil protein
a100599;18	303	21	12	35	0.0781062	0.10621	-0.742696	0.114286	0.153125	0.485089	PREDICTED: LOW QUALITY PROTEIN: serine/threonine-protein phosphatase 6 regulatory ankyrin repeat subunit B-like [Ailuropoda melanoleuca]
a10059;157	797	477	624	596	1.12389e-07	4.49794e-07	0.452216	0.217635	0.260924	0.0694463	NA
a1005;2245	522	5302	3386	6849	3.39427e-77	1.05586e-75	-0.582295	4.14747e-06	1.55164e-05	0.11748	protein S100-A4 [Bos taurus]
a100609;20	377	34	23	40	0.101015	0.132979	-0.499242	0.474172	0.480214	-0.0174115	PREDICTED: KIAA0556-like [Bos taurus]
a10060;114	2818	1714	1096	1767	3.46274e-26	4.86507e-25	-0.58046	1.07201e-05	3.76161e-05	-0.207942	switch-associated protein 70 [Bos taurus]
a100612;13	948	74	32	59	5.15537e-05	0.000138797	-1.14479	0.0105036	0.0193451	-0.578687	PREDICTED: KIAA1671 protein-like [Bos taurus]
a100613;13	441	22	28	27	0.158561	0.195337	0.412583	0.465146	0.473941	0.0435791	NA
a100615;9	578	19	23	28	0.224546	0.262124	0.340294	0.243345	0.286823	0.307551	NA
a10061;96	4383	2067	1865	2085	0.0346329	0.0519578	-0.0837035	4.57553e-08	2.21791e-07	-0.239368	rab3 GTPase-activating protein non-catalytic subunit [Bos taurus]
a100620;9	786	14	50	34	1.04194e-06	3.67289e-06	1.90116	0.0109803	0.0200707	1.02823	NA
a10062;124	1186	647	561	801	0.0450051	0.0655855	-0.141106	0.231609	0.275099	0.0561598	39S ribosomal protein L14, mitochondrial precursor [Bos taurus]
a100634;15	351	9	21	35	0.0106785	0.0182332	1.28705	0.000310092	0.000822769	1.70748	NA
a100637;16	486	24	31	47	0.134912	0.170232	0.433893	0.0229345	0.0385272	0.71775	NA
a100638;15	423	24	26	19	0.329814	0.360516	0.180136	0.0909474	0.126298	-0.588912	NA
a100643;15	308	12	18	28	0.114409	0.147883	0.649622	0.0242012	0.0404345	0.970516	tenascin C [Bos taurus]
a100644;11	654	28	35	33	0.145819	0.182069	0.386587	0.478288	0.48359	-0.0148376	WD repeat domain 36 [Bos taurus]
a100648;14	558	50	34	28	0.0627153	0.0879049	-0.491734	0.000550664	0.00138744	-1.08838	tripartite motif-containing protein 31-like [Bos taurus]
a10064;96	922	382	370	447	0.429436	0.445057	0.0186119	0.399653	0.422881	-0.0251746	NA
a100650;17	322	19	10	38	0.0632258	0.0883532	-0.86134	0.0318203	0.0511897	0.748123	MICAL-like isoform 3 [Bos taurus]
a100652;12	308	13	12	15	0.468064	0.474728	-0.050818	0.45897	0.469127	-0.0454259	NA
a100653;12	1006	68	40	53	0.00691125	0.0123324	-0.700876	0.0100623	0.0186326	-0.611419	beta-carotene 15,15'-monooxygenase 1 [Ovis aries]
a100654;14	431	20	41	26	0.00208261	0.00413876	1.10028	0.391707	0.416646	0.126635	NA
a100656;16	458	47	16	26	7.95358e-05	0.000207062	-1.48993	0.000676152	0.00166635	-1.10603	PREDICTED: protein FAM13C-like isoform 1 [Sus scrofa]
a100658;12	365	27	11	15	0.00703011	0.0125179	-1.2308	0.00794867	0.0151374	-1.09987	NA
a100659;13	400	21	35	14	0.0211684	0.0335685	0.801625	0.0451587	0.0693581	-0.836839	hedgehog interacting protein-like 2-like [Bos taurus]
a100661;13	548	35	20	35	0.0324236	0.0490516	-0.742696	0.230355	0.273841	-0.251877	PREDICTED: similar to Probable 7,8-dihydro-8-oxoguanine triphosphatase NUDT15 (8-oxo-dGTPase NUDT15) (Nucleoside diphosphate-linked moiety X motif 15) (Nudix motif 15) [Equus caballus]
a100662;12	899	63	39	41	0.0159004	0.0259938	-0.627218	0.00115438	0.00271062	-0.871605	shugoshin-like 2 [Bos taurus]
a100663;17	333	51	8	14	6.92596e-09	3.16956e-08	-2.60777	3.77707e-08	1.85161e-07	-2.11695	phospholipid scramblase 2 [Bos taurus]
a100665;13	499	30	8	50	0.000247147	0.00058839	-1.84223	0.0736289	0.105175	0.485089	sperm associated antigen 5 [Bos taurus]
a100668;15	328	38	3	23	6.26474e-09	2.87621e-08	-3.59831	0.00466997	0.00945993	-0.976242	NA
a10066;156	1377	1314	665	976	3.2177e-43	6.78896e-42	-0.91788	1.19513e-29	2.09726e-28	-0.680889	RecName: Full=Presenilins-associated rhomboid-like protein, mitochondrial; AltName: Full=Mitochondrial intramembrane cleaving protease PARL; Contains: RecName: Full=P-beta; Short=Pbeta; Flags: Precursor
a100677;11	671	17	22	59	0.175577	0.213133	0.436628	1.52204e-05	5.22374e-05	1.5433	NA
a100681;16	529	58	17	34	1.78628e-06	6.1078e-06	-1.70586	0.000417468	0.00107475	-1.02239	alpha-ketoglutarate-dependent dioxygenase alkB homolog 2 [Bos taurus]
a100686;12	524	65	3	16	3.7523e-16	3.50858e-15	-4.37275	1.00053e-10	6.39064e-10	-2.27424	unnamed protein product [Homo sapiens]
a100696;11	308	1	20	9	0.000289209	0.00067785	4.38659	0.0128126	0.0230853	2.91805	NA
a100699;13	508	14	39	39	0.000144667	0.000359485	1.54271	0.00230812	0.00503487	1.22617	NA
a10069;190	804	761	666	739	0.0476345	0.0688474	-0.127715	3.93133e-05	0.000124927	-0.294199	dynactin subunit 6 [Bos taurus]
a100705;14	444	42	17	18	0.000964247	0.0020434	-1.2402	7.61046e-05	0.000228616	-1.47427	heat shock 27kDa protein family, member 7 (cardiovascular), isoform CRA_a [Homo sapiens]
a100706;18	735	92	34	50	2.98982e-07	1.13449e-06	-1.37144	2.37203e-06	9.21569e-06	-1.13158	NA
a100707;16	780	21	64	89	3.8706e-07	1.44509e-06	1.67234	3.43913e-09	1.89132e-08	1.83154	NA
a100712;11	344	8	27	15	0.000375359	0.000858908	1.81955	0.1572	0.198901	0.655014	NA
a100716;11	505	24	21	28	0.386321	0.407375	-0.127986	0.46468	0.473594	-0.0294843	NA
a100721;11	559	12	61	6	3.13682e-07	1.18683e-06	2.41043	0.0388093	0.0607768	-1.25188	NA
a100723;13	580	61	12	37	4.3417e-09	2.02637e-08	-2.28112	0.000501812	0.00127245	-0.973161	ectonucleotide pyrophosphatase/phosphodiesterase family member 4 precursor [Bos taurus]
a100724;12	790	40	59	28	0.0166596	0.0270624	0.625374	0.0148943	0.0263898	-0.76645	NA
a100725;16	332	35	5	24	7.82521e-07	2.80022e-06	-2.7427	0.0178797	0.0309356	-0.796197	NA
a100726;18	319	44	16	12	0.000254778	0.000605076	-1.39477	2.81686e-07	1.23755e-06	-2.12635	NA
a100728;13	314	12	29	11	0.00255721	0.00499722	1.33768	0.262608	0.30427	-0.377408	NA
a100729;9	461	18	19	21	0.381743	0.403474	0.142662	0.467677	0.475898	-0.0294843	NA
a100730;14	424	50	11	14	3.38746e-07	1.27406e-06	-2.11977	6.55308e-08	3.12393e-07	-2.08838	NA
a100735;12	459	32	15	21	0.010122	0.017353	-1.02845	0.0160752	0.0281893	-0.859559	NA
a100739;12	535	15	24	46	0.0584291	0.0824808	0.742731	0.000404191	0.00104322	1.36479	NA
a100740;10	834	65	8	40	3.27417e-12	2.07497e-11	-2.95771	0.000425932	0.00109534	-0.952316	NA
a100748;13	616	28	11	71	0.00487016	0.0089467	-1.28326	0.000224328	0.000612311	1.09052	PREDICTED: collagen type VI alpha 6-like [Bos taurus]
a10074;186	894	732	902	708	1.58181e-07	6.22011e-07	0.365943	3.99449e-05	0.000126745	-0.299971	NA
a100750;13	478	40	16	22	0.00111798	0.00234006	-1.25727	0.00147743	0.00337928	-1.11437	NA
a100752;12	352	40	8	7	2.05318e-06	6.96321e-06	-2.25727	1.29728e-08	6.69748e-08	-2.76645	NA
a100753;15	718	78	14	54	7.6548e-12	4.67153e-11	-2.41339	0.00099406	0.00236607	-0.782391	NA
a100754;13	789	67	52	28	0.130394	0.165351	-0.30099	5.24213e-07	2.22553e-06	-1.51061	alkylated DNA repair protein alkB homolog 8 [Bos taurus]
a100755;17	360	33	18	34	0.0267813	0.041387	-0.80981	0.273976	0.314342	-0.208808	NA
a100756;15	322	12	34	18	0.000315503	0.000734972	1.56716	0.277422	0.316628	0.333086	PREDICTED: similar to hCG1811076 [Equus caballus]
a100757;15	420	37	12	33	0.000275431	0.000650665	-1.55983	0.112746	0.151285	-0.416936	PREDICTED: ETS translocation variant 1-like [Ailuropoda melanoleuca]
a100759;15	384	23	19	23	0.322204	0.353879	-0.210975	0.273831	0.314253	-0.251877	NA
a100760;16	482	32	30	24	0.470857	0.476768	-0.0284502	0.0426341	0.0660673	-0.666914	voltage-dependent L-type calcium channel subunit beta-1 [Bos taurus]
a100761;14	370	8	22	38	0.00371893	0.00703293	1.52409	3.75131e-05	0.000119496	1.99605	NA
a100764;13	693	40	18	64	0.0032233	0.00614903	-1.08734	0.0721433	0.103641	0.426195	NA
a100765;10	653	12	36	47	0.000130467	0.000326928	1.64962	3.11894e-05	0.000100926	1.71775	NA
a100766;12	304	13	15	15	0.311324	0.343663	0.27111	0.45897	0.469127	-0.0454259	NA
a100768;13	396	13	32	25	0.00139923	0.00288008	1.36422	0.0822403	0.115846	0.69154	NA
a100770;10	700	32	25	22	0.227302	0.26502	-0.291485	0.0228021	0.0383264	-0.792445	NA
a100772;14	614	73	10	33	6.79601e-13	4.79091e-12	-2.80324	7.64713e-07	3.17025e-06	-1.39731	PREDICTED: metal-response element-binding transcription factor 2-like [Ailuropoda melanoleuca]
a100773;17	649	40	55	54	0.0398473	0.0587445	0.524091	0.278394	0.317332	0.181083	endonuclease reverse transcriptase [Bos taurus]
a100774;14	524	37	19	36	0.0127855	0.0214433	-0.896867	0.192376	0.236636	-0.291405	NA
a100777;12	492	22	22	38	0.439926	0.454003	0.0646592	0.0839736	0.118018	0.536619	hypothetical protein PANDA_014165 [Ailuropoda melanoleuca]
a100779;12	986	76	55	38	0.0578345	0.0818461	-0.401909	3.31066e-06	1.25788e-05	-1.25188	NA
a100781;16	423	24	33	28	0.087948	0.117748	0.524091	0.46468	0.473594	-0.0294843	NA
a100783;14	315	5	10	32	0.0895512	0.119657	1.06466	3.05916e-05	9.90898e-05	2.4262	NA
a100786;11	1016	58	38	63	0.0346992	0.0520477	-0.545394	0.304078	0.341348	-0.132578	cGMP-specific 3',5'-cyclic phosphodiesterase [Bos taurus]
a100789;12	668	41	15	56	0.000424431	0.000961365	-1.386	0.256644	0.298929	0.197926	NA
a100795;14	396	51	3	19	2.28583e-12	1.4863e-11	-4.0228	2.22232e-06	8.66042e-06	-1.67637	NA
a100798;13	423	16	27	29	0.0349446	0.0523391	0.819547	0.0906871	0.126011	0.606104	NA
a10079;102	8808	3726	3840	5243	0.000557315	0.00123837	0.108138	2.33003e-12	1.80032e-11	0.240888	dystonin [Bos taurus]
a100801;13	424	33	13	22	0.00250044	0.00489124	-1.2793	0.0167082	0.0290952	-0.836839	NA
a100806;14	453	47	20	20	0.00086566	0.00185776	-1.168	2.78961e-05	9.11341e-05	-1.48454	NA
a100809;14	426	11	30	46	0.00089534	0.0019171	1.51212	2.00686e-05	6.72554e-05	1.81225	NA
a10080;83	4050	1517	1232	2028	9.97132e-06	3.05115e-05	-0.23556	0.000318601	0.00084094	0.16696	KIAA0552 protein [Homo sapiens]
a100811;17	667	56	31	69	0.00672545	0.0120174	-0.788499	0.42905	0.446154	0.0492928	NA
a100812;12	1186	40	57	83	0.0260667	0.0404053	0.575621	0.00164949	0.00373578	0.801235	NA
a100815;10	629	34	14	31	0.00308229	0.00590042	-1.21545	0.139984	0.181533	-0.385143	NA
a100816;14	355	10	33	16	0.000111375	0.000281797	1.78713	0.241713	0.285142	0.426195	NA
a100817;14	422	46	9	24	3.00051e-07	1.13806e-06	-2.28898	0.000385925	0.00100113	-1.19048	NA
a100821;12	447	4	38	32	2.50694e-05	7.15199e-05	3.31259	2.19332e-05	7.3068e-05	2.74812	NA
a100823;10	879	12	29	77	0.00255721	0.00499722	1.33768	8.05719e-08	3.80495e-07	2.42995	NA
a100829;16	343	26	17	32	0.113137	0.14668	-0.548318	0.456678	0.467661	0.0476835	NA
a10082;118	3234	1474	1835	2038	2.23266e-12	1.45366e-11	0.380703	5.87181e-06	2.14592e-05	0.215541	block of proliferation 1 [Bos taurus]
a100833;16	556	31	58	28	0.00104532	0.00220219	0.968444	0.143324	0.185224	-0.398718	NA
a100834;12	631	71	11	23	7.58684e-12	4.63265e-11	-2.62566	2.15083e-09	1.20785e-08	-1.87806	NA
a100837;10	1080	51	48	51	0.470046	0.47604	-0.0228036	0.187398	0.231408	-0.251877	ubiquitin specific peptidase 43 [Bos taurus]
a100843;14	438	38	23	22	0.0413147	0.0606194	-0.659706	0.00307926	0.00655118	-1.04037	PREDICTED: similar to CMP-N-acetylneuraminate-poly-alpha-2,8-sialyl transferase (Alpha-2,8-sialyltransferase 8D) (ST8Sia IV) (Polysialyltransferase-1) [Canis familiaris]
a100846;13	752	51	35	47	0.0655673	0.0912565	-0.478483	0.101674	0.138575	-0.369713	transcription factor IIIB 50 kDa subunit [Bos taurus]
a100848;11	931	56	34	55	0.0177623	0.0286773	-0.655233	0.153915	0.195493	-0.277872	Zinc finger protein 367-like [Bos taurus]
a100850;11	414	25	8	20	0.00221459	0.00437899	-1.5792	0.0915371	0.126705	-0.573805	NA
a100855;16	711	48	61	42	0.070062	0.0966659	0.410434	0.0717059	0.103055	-0.444522	integrin alpha 2b [Bos taurus]
a100856;11	661	16	42	42	0.000153815	0.000380618	1.45698	0.00272262	0.00585494	1.14044	Fanconi anemia, complementation group A [Bos taurus]
a100859;13	353	9	30	35	0.000204168	0.000492381	1.80162	0.000310092	0.000822769	1.70748	NA
a10085;90	2517	844	974	1387	3.10347e-05	8.70169e-05	0.271338	5.25913e-13	4.50581e-12	0.464776	transmembrane protein 203 [Rattus norvegicus]
a100867;16	426	16	53	23	1.23581e-06	4.32525e-06	1.79258	0.289739	0.3284	0.271685	NA
a100868;14	595	29	25	56	0.354979	0.38284	-0.149466	0.016559	0.0288743	0.697497	NA
a100869;15	913	70	54	55	0.118712	0.152787	-0.309736	0.0102279	0.0188973	-0.5998	Usher syndrome 1C binding protein 1 [Bos taurus]
a100871;12	434	15	19	40	0.209377	0.247189	0.405696	0.00295144	0.00630834	1.16316	NA
a100874;13	376	6	18	39	0.00535943	0.00976625	1.64962	7.27214e-06	2.61699e-05	2.44856	NA
a10087;128	1154	605	650	789	0.0195052	0.0311857	0.168164	0.0462585	0.0708843	0.131213	zinc finger CCCH-type containing 11A [Bos taurus]
a100881;15	376	28	16	28	0.0498744	0.0715563	-0.742696	0.254135	0.296756	-0.251877	ataxin-7-like protein 2 [Bos taurus]
a100882;11	383	8	17	27	0.0292768	0.0448141	1.15212	0.00318172	0.00674375	1.50301	E3 ubiquitin-protein ligase RNF138 isoform 3 [Homo sapiens]
a100885;11	339	13	19	14	0.120198	0.154459	0.612147	0.390818	0.416282	-0.144962	NA
a100890;10	614	25	19	30	0.228696	0.266209	-0.331269	0.494944	0.495959	0.0111577	NA
a100894;10	369	13	11	16	0.387549	0.408472	-0.176349	0.47389	0.480136	0.0476835	PREDICTED: zinc finger protein 582-like [Pongo abelii]
a100895;12	374	4	39	15	2.50661e-05	7.1523e-05	3.35006	0.0164107	0.0286854	1.65501	NA
a100896;13	324	9	18	30	0.0336827	0.0507096	1.06466	0.00213006	0.0047001	1.48509	PREDICTED: helicase, POLQ-like [Bos taurus]
a10089;104	1344	678	741	512	0.00592617	0.0107145	0.192848	2.49728e-15	2.62658e-14	-0.657018	PREDICTED: UL16 binding protein 1-like [Bos taurus]
a1008;1345	3646	24550	17215	25781	5.68886e-217	2.65866e-215	-0.447398	2.51553e-45	5.92036e-44	-0.181292	syndecan-1 precursor [Bos taurus]
a100900;12	784	43	30	55	0.0933263	0.124112	-0.454715	0.367638	0.396453	0.103218	PREDICTED: LOW QUALITY PROTEIN: pappalysin-1 [Sus scrofa]
a100901;16	344	12	41	29	1.32331e-05	3.97434e-05	1.83725	0.0180145	0.0311217	1.02114	NA
a100904;12	966	30	20	105	0.107079	0.139578	-0.520303	9.31074e-09	4.89275e-08	1.55548	kin of IRRE like 3 [Bos taurus]
a100906;14	328	24	1	21	6.85398e-07	2.47767e-06	-4.5203	0.149954	0.191918	-0.444522	NA
a100907;15	492	53	20	24	0.000103516	0.00026284	-1.34133	2.19806e-05	7.31813e-05	-1.39483	NA
a10090;147	368	241	246	218	0.235278	0.272627	0.0942844	0.00161595	0.00366277	-0.396582	NA
a100911;15	481	32	28	38	0.368448	0.394146	-0.127986	0.489966	0.492231	-0.00394924	NA
a100916;11	1047	57	22	75	7.89171e-05	0.00020568	-1.3088	0.288847	0.327491	0.144052	NA
a100917;16	742	68	44	38	0.0213353	0.0338009	-0.563372	6.73304e-05	0.000204239	-1.09141	NA
a100927;15	441	9	34	43	3.0683e-05	8.61537e-05	1.9822	1.17191e-05	4.08719e-05	2.00446	NA
a100929;12	595	24	42	30	0.00835871	0.0146139	0.872014	0.436516	0.451789	0.0700513	peptidyl arginine deiminase, type II [Bos taurus]
a10092;214	962	1056	682	1030	3.43802e-16	3.22207e-15	-0.566107	2.6158e-06	1.01024e-05	-0.287842	adenylate kinase isoenzyme 6 isoform 1 [Bos taurus]
a100930;15	754	83	17	52	1.73696e-11	1.01025e-10	-2.22292	0.000114457	0.000331343	-0.926476	RecName: Full=Uncharacterized protein C6orf64 homolog
a100932;13	666	36	16	64	0.00445861	0.00829805	-1.10527	0.0267617	0.0440628	0.578198	PREDICTED: similar to dystonin isoform b isoform 1 [Canis familiaris]
a100937;15	374	24	21	32	0.386321	0.407375	-0.127986	0.344579	0.37708	0.163161	neuronal PAS domain-containing protein 2 [Bos taurus]
a10093;84	799	340	174	466	3.08835e-12	1.96622e-11	-0.901788	0.0242527	0.0404566	0.202918	keratin 38-like [Bos taurus]
a100942;10	454	22	9	27	0.0139268	0.0230466	-1.22485	0.465146	0.473941	0.0435791	PREDICTED: hypothetical protein [Bos taurus]
a100944;17	356	42	16	18	0.000539655	0.00120239	-1.32766	7.61046e-05	0.000228616	-1.47427	phosphatidylinositol glycan anchor biosynthesis, class F [Bos taurus]
a100947;12	345	20	25	15	0.186935	0.225438	0.386587	0.0870044	0.121571	-0.666914	NA
a100949;15	1508	149	50	109	3.83611e-12	2.41412e-11	-1.51065	4.93524e-05	0.000153263	-0.702861	Lowe oculocerebrorenal syndrome protein [Homo sapiens]
a10094;154	2064	1633	1236	1610	2.42498e-10	1.27186e-09	-0.337187	3.86767e-08	1.89404e-07	-0.272341	histidyl-tRNA synthetase, cytoplasmic [Bos taurus]
a100951;13	948	38	54	77	0.0301939	0.0460879	0.571619	0.00322721	0.00683133	0.766982	NA
a100956;16	468	11	45	45	1.29907e-06	4.52649e-06	2.09708	3.0055e-05	9.74964e-05	1.78054	NA
a100959;17	580	39	45	44	0.195569	0.233656	0.27111	0.398897	0.422213	-0.0778474	colony stimulating factor 2 receptor alpha chain-like [Bos taurus]
a10095;71	1946	762	533	659	1.25217e-08	5.57355e-08	-0.450996	8.5589e-10	5.01247e-09	-0.461389	PREDICTED: cullin-2-like [Ailuropoda melanoleuca]
a100962;11	476	35	18	17	0.0151738	0.0248938	-0.894699	0.000884165	0.0021266	-1.2937	armadillo repeat-containing protein 2 [Bos taurus]
a100963;14	635	63	20	37	2.11988e-06	7.17752e-06	-1.59069	0.000255257	0.000689662	-1.0197	NA
a100968;12	733	6	45	69	9.22764e-06	2.84308e-05	2.97155	4.65966e-06	1.73159e-05	3.27169	NA
a100971;18	450	36	31	32	0.337061	0.366156	-0.151069	0.113432	0.152143	-0.421802	NA
a100972;15	323	23	13	24	0.0650095	0.0905289	-0.758463	0.321551	0.356716	-0.190476	NA
a100977;13	488	57	14	18	2.1964e-07	8.45145e-07	-1.96088	5.0434e-08	2.43593e-07	-1.91484	NA
a100978;13	349	10	14	35	0.180925	0.219024	0.550086	0.000677995	0.00166976	1.55548	NA
a10097;146	649	352	524	416	4.35828e-11	2.45015e-10	0.638651	0.456943	0.46783	-0.0108687	ubiquitin/ISG15-conjugating enzyme E2 L6 [Bos taurus]
a100988;15	583	30	26	51	0.359646	0.387082	-0.141792	0.0614064	0.0901692	0.513658	MORN repeat containing 1-like [Bos taurus]
a100990;12	510	32	12	25	0.00198885	0.00396277	-1.35038	0.056376	0.084012	-0.608021	NA
a100991;13	594	18	43	43	0.000348199	0.000801163	1.321	0.00557024	0.0110597	1.00446	RecName: Full=HERV-R(b)_3p24.3 provirus ancestral Env polyprotein; AltName: Full=Envelope polyprotein; AltName: Full=HERV-R(b) Env protein; Includes: RecName: Full=Surface protein domain; Short=SU; Includes: RecName: Full=Transmembrane protein domain; Short=TM; Flags: Precursor
a100992;9	967	61	15	45	8.6697e-08	3.52136e-07	-1.95919	0.00709801	0.0137255	-0.690761	integrin, alpha 1 [Bos taurus]
a100995;12	829	51	46	28	0.38881	0.409279	-0.0842041	0.000381544	0.000990967	-1.11695	NA
a100998;14	646	50	31	47	0.0285174	0.0437526	-0.625001	0.121251	0.160297	-0.341144	PREDICTED: hypothetical protein [Bos taurus]
a100;21809	669	54418	45032	101368	1.26979e-114	4.79029e-113	-0.208474	0	0	0.64557	keratin, type II cytoskeletal 71 [Bos taurus]
a101001;10	380	11	24	21	0.010172	0.0174302	1.19019	0.10567	0.143145	0.681009	NA
a101006;14	1231	85	76	78	0.336741	0.365857	-0.0968042	0.0479074	0.0729286	-0.375865	PREDICTED: CG4766-like [Bos taurus]
a101010;19	363	44	8	39	2.70183e-07	1.02931e-06	-2.39477	0.0889574	0.123957	-0.425906	NA
a101014;11	327	6	31	7	1.58984e-05	4.70052e-05	2.43389	0.473537	0.48021	-0.0294843	NA
a101020;14	1212	89	47	93	0.000397344	0.000905986	-0.856485	0.187821	0.231805	-0.188451	PREDICTED: zinc finger protein 537 [Bos taurus]
a101021;11	340	6	30	12	2.07908e-05	6.04709e-05	2.38659	0.158556	0.20032	0.748123	PREDICTED: LOW QUALITY PROTEIN: rho GTPase-activating protein 22-like [Sus scrofa]
a101024;13	312	22	10	13	0.023894	0.0373041	-1.07284	0.0211982	0.0359721	-1.01087	NA
a101028;12	510	27	34	16	0.143273	0.179465	0.397235	0.0124214	0.0224641	-1.00676	PREDICTED: similar to Liprin-alpha 4 (Protein tyrosine phosphatase receptor type f polypeptide-interacting protein alpha 4) (PTPRF-interacting protein alpha 4) [Canis familiaris]
a101030;13	394	12	20	34	0.0636308	0.0888205	0.801625	0.00369255	0.00768666	1.25062	NA
a101032;17	511	18	46	50	0.000105946	0.000268759	1.4183	0.000660546	0.00163355	1.22205	NA
a101039;12	344	17	23	24	0.139873	0.175594	0.500758	0.303745	0.34115	0.245623	NA
a10103;131	3250	1453	2256	2300	1.72606e-12	1.1484e-11	0.699392	1.88483e-12	1.47937e-11	0.410722	hCG23632-like [Bos taurus]
a101047;10	352	32	2	15	3.65606e-08	1.54989e-07	-3.93534	0.00103946	0.00246137	-1.34499	NA
a101049;19	318	37	12	22	0.000275431	0.000650665	-1.55983	0.00439322	0.00897482	-1.0019	transmembrane protein C5orf28 homolog [Bos taurus]
a10104;99	3347	1077	2080	1570	1.55431e-12	1.04203e-11	1.01422	1.38978e-07	6.38571e-07	0.29187	peroxisomal acyl-coenzyme A oxidase 3 [Bos taurus]
a101058;13	652	60	8	42	5.26089e-11	2.93192e-10	-2.84223	0.00387147	0.00803053	-0.76645	ankyrin repeat and SAM domain-containing protein 4B [Bos taurus]
a10105;75	2817	1004	1086	950	0.00241521	0.00473631	0.177924	1.89089e-07	8.50286e-07	-0.331637	UDP-N-acteylglucosamine pyrophosphorylase 1-like 1 [Bos taurus]
a101064;18	319	7	31	37	2.50643e-05	7.15469e-05	2.2115	2.29108e-05	7.59231e-05	2.15022	NA
a101069;16	398	49	3	40	7.82889e-12	4.77185e-11	-3.96509	0.037668	0.0593024	-0.544658	NA
a101075;14	326	13	26	14	0.0135126	0.0224873	1.06466	0.390818	0.416282	-0.144962	NA
a101080;17	396	19	27	23	0.0931274	0.123877	0.571619	0.486196	0.490042	0.0237577	NA
a101081;9	763	10	47	20	1.09948e-06	3.86255e-06	2.29732	0.0929493	0.128084	0.748123	NA
a101085;11	1167	39	52	82	0.0580242	0.0820354	0.479697	0.00144246	0.003307	0.820273	NAALADL1 protein [Bos taurus]
a101096;13	357	15	18	21	0.259439	0.295623	0.327694	0.324992	0.359887	0.23355	PREDICTED: hypothetical protein LOC100450580 [Pongo abelii]
a10109;82	2324	827	746	1088	0.12443	0.159015	-0.0840525	0.0152962	0.0270317	0.143843	RecName: Full=Translation initiation factor eIF-2B subunit gamma; AltName: Full=eIF-2B GDP-GTP exchange factor subunit gamma
a1010;1327	2377	12500	14982	16285	7.56684e-12	4.62101e-11	0.325961	0	0	0.129739	amino-terminal enhancer of split isoform b [Homo sapiens]
a101101;11	449	4	32	22	2.53413e-05	7.21845e-05	3.06466	0.000777771	0.00189234	2.20755	NA
a101102;14	376	35	21	6	0.0453165	0.0660139	-0.672306	8.54059e-08	4.00991e-07	-2.7962	NA
a101104;15	454	63	17	9	2.03477e-07	7.86897e-07	-1.82516	7.2273e-14	6.89369e-13	-3.05923	NA
a101106;12	326	34	2	11	1.06581e-08	4.7789e-08	-4.0228	2.60231e-05	8.54985e-05	-1.87991	NA
a10110;204	909	1327	327	734	1.32946e-133	5.34373e-132	-1.95615	8.27979e-66	2.41931e-64	-1.10619	PREDICTED: epiplakin 1 [Bos taurus]
a101110;14	364	26	6	32	0.000260149	0.000616431	-2.05082	0.456678	0.467661	0.0476835	NA
a101114;14	644	77	19	25	2.14097e-09	1.02856e-08	-1.9542	4.97594e-10	2.9775e-09	-1.87481	PREDICTED: hypothetical protein [Bos taurus]
a101116;16	405	44	27	18	0.0343228	0.0515548	-0.639885	3.06565e-05	9.92771e-05	-1.54138	NA
a10111;77	1153	505	340	373	2.31735e-07	8.8779e-07	-0.506089	9.24793e-13	7.63557e-12	-0.688985	UTP11-like, U3 small nucleolar ribonucleoprotein [Bos taurus]
a101129;12	736	28	36	56	0.120317	0.154483	0.427229	0.0117484	0.0213484	0.748123	NA
a10112;149	1568	1071	1276	1096	5.22868e-08	2.17425e-07	0.317329	0.000211616	0.000580096	-0.218587	zinc finger protein 64 [Bos taurus]
a101130;13	301	22	7	21	0.00376969	0.00711756	-1.58742	0.231928	0.275395	-0.318991	NA
a101133;13	484	46	11	19	2.27169e-06	7.66089e-06	-1.99947	2.33425e-05	7.72833e-05	-1.52751	PREDICTED: hypothetical protein XP_539202 [Canis familiaris]
a101135;11	371	14	28	7	0.0108163	0.0184282	1.06466	0.028028	0.045923	-1.25188	NA
a10113;103	1085	421	505	693	0.000288017	0.000675266	0.327122	6.02815e-08	2.88419e-07	0.467158	NA
a101140;12	1029	104	26	34	5.42488e-12	3.3612e-11	-1.93534	7.05318e-13	5.93521e-12	-1.86485	NA
a101144;14	458	56	10	16	5.74945e-09	2.6478e-08	-2.42077	1.5252e-08	7.81054e-08	-2.05923	NA
a101145;10	922	41	41	48	0.418878	0.436325	0.0646592	0.46355	0.47256	-0.0244663	P2Y purinoceptor 13 [Bos taurus]
a10114;119	3196	1709	1648	2081	0.402892	0.422396	0.0122231	0.247315	0.290196	0.0322478	semaphorin-4A precursor [Bos taurus]
a101152;21	304	21	7	58	0.00574403	0.0104094	-1.5203	0.00028351	0.00076033	1.21379	NA
a101153;16	691	45	46	60	0.374605	0.399259	0.0963681	0.287624	0.326493	0.163161	melanocyte protein PMEL precursor [Bos taurus]
a101154;17	309	44	6	17	2.1817e-08	9.46733e-08	-2.80981	1.57165e-05	5.37672e-05	-1.62385	NA
a101157;11	359	25	4	23	4.86726e-05	0.000131912	-2.5792	0.184288	0.22834	-0.372171	NA
a101159;14	473	15	21	47	0.130671	0.165657	0.550086	0.000285348	0.00076407	1.39582	NA
a101160;15	507	63	12	26	1.59248e-09	7.73722e-09	-2.32766	8.97922e-07	3.68964e-06	-1.52872	NA
a101161;11	311	4	15	12	0.00446816	0.00831047	1.97155	0.0535667	0.0805255	1.33309	NA
a101162;10	713	53	6	35	1.41156e-10	7.55344e-10	-3.0783	0.0031051	0.00659901	-0.850514	NA
a101167;13	370	29	22	12	0.209398	0.247131	-0.33389	0.000645324	0.00160353	-1.5249	NA
a10116;129	1947	1565	688	1412	3.61657e-70	1.06498e-68	-1.12102	1.92372e-14	1.92599e-13	-0.400299	PREDICTED: similar to frizzled-6 [Equus caballus]
a101178;11	1220	54	63	71	0.141821	0.177812	0.287052	0.295624	0.334015	0.142983	SH2 domain containing 3A [Bos taurus]
a101179;11	374	8	23	12	0.00238753	0.00468727	1.58822	0.319539	0.355097	0.333086	NA
a10117;86	1129	477	398	488	0.0223285	0.0352488	-0.196562	0.00918745	0.0172266	-0.218985	NA
a101180;21	396	28	17	59	0.0701509	0.0967532	-0.655233	0.00574732	0.0113726	0.823411	PREDICTED: leucine-rich repeat-containing protein 8C-like [Pongo abelii]
a101182;13	436	13	57	6	1.84337e-07	7.18706e-07	2.19711	0.0246069	0.0409841	-1.36735	NA
a101183;12	552	32	15	34	0.010122	0.017353	-1.02845	0.318287	0.354187	-0.164414	NA
a101186;15	621	87	6	30	2.71042e-19	2.9657e-18	-3.79332	1.60329e-10	1.00281e-09	-1.78793	NA
a101189;18	345	6	34	41	1.04747e-05	3.19931e-05	2.56716	5.66179e-06	2.07403e-05	2.52071	NA
a10118;139	3867	1917	2790	2949	1.62681e-12	1.0876e-11	0.606074	0	0	0.369499	1-phosphatidylinositol-4,5-bisphosphate phosphodiesterase beta-3 [Bos taurus]
a101192;13	651	71	16	25	2.06928e-09	9.9524e-09	-2.08509	1.0168e-08	5.30971e-08	-1.75777	NA
a101196;8	819	14	22	49	0.0729677	0.099913	0.716736	6.87183e-05	0.000208083	1.55548	NA
a101197;19	319	25	34	19	0.0907009	0.121046	0.508266	0.0691409	0.100036	-0.647805	NA
a101198;11	395	25	8	23	0.00221459	0.00437899	-1.5792	0.184288	0.22834	-0.372171	NA
a10119;132	3953	1743	2566	2989	1.51823e-12	1.01965e-11	0.622608	1.28331e-12	1.03606e-11	0.526214	CG12333-like [Bos taurus]
a1011;1283	1392	10152	5767	9162	2.20643e-227	1.04207e-225	-0.751212	6.89313e-83	2.2708e-81	-0.399906	annexin A1 [Bos taurus]
a101215;10	509	5	36	26	1.55227e-05	4.59899e-05	2.91266	0.000363393	0.000946778	2.12663	NA
a101217;11	901	96	21	20	1.96174e-12	1.29286e-11	-2.12799	9.48561e-17	1.07131e-15	-2.51491	NA
a101219;17	463	60	16	18	3.29937e-07	1.2445e-06	-1.84223	1.03771e-08	5.4143e-08	-1.98884	NA
a10121;173	1431	1079	1020	1362	0.397184	0.417052	-0.0164665	0.0763473	0.108778	0.0841551	NA
a101221;12	757	34	35	34	0.379219	0.402487	0.106479	0.233524	0.277079	-0.251877	hypothetical protein LOC511259 [Bos taurus]
a101223;12	421	47	8	19	5.7124e-08	2.36309e-07	-2.48993	1.47371e-05	5.06601e-05	-1.55854	NA
a101224;13	517	22	35	28	0.0298867	0.0456446	0.734511	0.414922	0.434911	0.0960466	NA
a101227;13	553	31	23	41	0.180793	0.218967	-0.365975	0.335467	0.369152	0.151479	NA
a101230;14	787	85	8	56	3.4823e-17	3.46558e-16	-3.34473	0.000250653	0.000678417	-0.853913	NA
a101234;11	931	86	13	38	3.38729e-14	2.81232e-13	-2.66117	5.3731e-08	2.58627e-07	-1.43021	serine/threonine-protein kinase PLK4 [Bos taurus]
a101238;12	353	6	12	32	0.06946	0.0959417	1.06466	7.22428e-05	0.000217668	2.16316	NA
a10123;83	2565	889	731	1406	0.00123991	0.00257133	-0.217653	1.16043e-11	8.16356e-11	0.409465	ring finger protein 222-like [Bos taurus]
a101240;18	458	35	16	60	0.00619656	0.0111627	-1.06462	0.0433016	0.0669528	0.525731	hyaluronidase-3 precursor [Sus scrofa]
a101242;11	769	91	12	14	5.75198e-16	5.33319e-15	-2.85817	1.09816e-18	1.35765e-17	-2.95232	NA
a101247;18	515	37	12	73	0.000275431	0.000650665	-1.55983	0.00562669	0.0111632	0.728494	NA
a101249;17	338	43	6	20	3.77811e-08	1.5975e-07	-2.77664	0.000160179	0.000450083	-1.35621	NA
a101252;16	558	48	14	57	1.21926e-05	3.6838e-05	-1.71295	0.48994	0.49224	-0.00394924	NA
a101255;15	364	32	16	22	0.015913	0.0260096	-0.935341	0.0228021	0.0383264	-0.792445	NA
a10125;169	433	369	216	386	2.99569e-09	1.42208e-08	-0.70793	0.037479	0.0590314	-0.186897	NA
a101260;11	521	17	25	30	0.085576	0.114939	0.621053	0.0998996	0.136482	0.567551	NA
a101263;18	409	51	11	37	2.08761e-07	8.06221e-07	-2.14833	0.0104378	0.0192572	-0.714849	rolling pebbles-like [Bos taurus]
a101267;15	1006	84	64	73	0.0858904	0.115303	-0.327658	0.0242238	0.0404551	-0.45437	mKIAA1077 protein [Mus musculus]
a101272;17	405	33	25	30	0.192407	0.230498	-0.335879	0.141116	0.182579	-0.38938	NA
a101273;11	1539	89	72	80	0.146664	0.183094	-0.241149	0.0336709	0.0538581	-0.405682	ribosomal RNA processing 8, methyltransferase, homolog [Bos taurus]
a101274;13	552	28	26	43	0.459228	0.46867	-0.042256	0.150766	0.192624	0.367033	NA
a101276;14	353	43	6	16	3.77811e-08	1.5975e-07	-2.77664	1.26087e-05	4.37492e-05	-1.67814	NA
a101278;13	787	58	32	47	0.00571439	0.0103683	-0.793322	0.0244943	0.0408319	-0.555269	dynamin-binding protein [Bos taurus]
a10127;111	1722	648	808	1222	2.20341e-07	8.47378e-07	0.383021	0	0	0.663302	PREDICTED: kelch repeat and BTB domain-containing protein 4-like [Sus scrofa]
a101282;14	520	17	49	33	1.55207e-05	4.59965e-05	1.59191	0.0508965	0.0768903	0.705055	NA
a10128;78	1784	770	598	617	6.49765e-05	0.000171173	-0.300054	9.14726e-14	8.62371e-13	-0.571465	KIAA1449 protein [Homo sapiens]
a101290;16	468	58	35	12	0.0151723	0.024895	-0.664039	8.18868e-11	5.28704e-10	-2.5249	NA
a101291;12	355	34	11	10	0.000461472	0.0010403	-1.56337	1.11219e-05	3.89481e-05	-2.01741	NA
a101294;11	499	15	37	24	0.000630484	0.0013855	1.36722	0.191042	0.235417	0.426195	PREDICTED: similar to Probable RNA-binding protein KIAA1579 [Canis familiaris]
a101295;11	1079	54	46	79	0.28428	0.319142	-0.166666	0.12359	0.163137	0.297016	NA
a101298;15	354	43	0	20	1.50695e-13	1.16905e-12	0/unlimited	0.000160179	0.000450083	-1.35621	NA
a10129;250	697	537	880	839	3.91909e-13	2.8586e-12	0.777241	3.67951e-07	1.58981e-06	0.391872	PREDICTED: plexin-D1-like [Ailuropoda melanoleuca]
a101301;14	424	35	19	21	0.0225324	0.0355056	-0.816696	0.00586077	0.0115615	-0.988842	NA
a101303;12	787	34	31	57	0.426155	0.44275	-0.0686073	0.0575866	0.0854698	0.49355	NA
a101304;12	352	12	34	12	0.000315503	0.000734972	1.56716	0.329759	0.364229	-0.251877	NA
a101306;10	615	26	18	40	0.148535	0.185166	-0.465855	0.158304	0.200126	0.369612	RecName: Full=Uncharacterized protein C22orf29
a101312;13	311	29	14	12	0.0165146	0.0268491	-0.985967	0.000645324	0.00160353	-1.5249	NA
a101315;10	795	21	52	40	5.99564e-05	0.000159699	1.37278	0.0403627	0.0628947	0.677734	eukaryotic translation elongation factor 1 delta (guanine nucleotide exchange protein) isoform 1 [Bos taurus]
a101316;12	474	53	19	14	5.56667e-05	0.000149257	-1.41533	1.24072e-08	6.42438e-08	-2.17244	NA
a101317;9	792	36	27	37	0.172141	0.209802	-0.350378	0.262129	0.303934	-0.212348	luteinizing hormone beta-subunit [Ovis aries]
a101318;15	336	12	23	18	0.0239661	0.0373906	1.00326	0.277422	0.316628	0.333086	NA
a10131;112	3526	1459	1921	2178	2.17937e-13	1.65578e-12	0.461537	9.28346e-12	6.61231e-11	0.326147	PREDICTED: TOM1-like protein 2-like [Ailuropoda melanoleuca]
a101323;13	389	42	18	4	0.00165605	0.00335527	-1.15773	3.80562e-11	2.5503e-10	-3.64419	NA
a101324;17	349	18	43	16	0.000348199	0.000801163	1.321	0.195667	0.239554	-0.421802	NA
a101325;15	317	16	16	33	0.4484	0.460648	0.0646592	0.0350111	0.055689	0.792517	NA
a101326;11	846	59	22	41	3.79846e-05	0.000105185	-1.35855	0.0037693	0.00783232	-0.776968	kinetochore associated 1 [Bos taurus]
a101329;15	367	35	8	23	2.38431e-05	6.84069e-05	-2.06462	0.0126413	0.0228252	-0.857598	PREDICTED: kelch repeat and BTB (POZ) domain containing 3 [Bos taurus]
a101336;10	663	22	43	25	0.00267296	0.00520478	1.03149	0.430651	0.447591	-0.0674522	insulin-like growth factor binding protein, acid labile subunit [Bos taurus]
a101337;16	646	11	70	47	5.63113e-07	2.0585e-06	2.73451	1.33703e-05	4.62595e-05	1.84328	NA
a101338;11	803	26	48	49	0.00298339	0.00572963	0.949182	0.0286722	0.0468169	0.662393	NA
a101340;15	809	37	61	53	0.00408951	0.00766791	0.785943	0.198002	0.242074	0.26659	NA
a101343;14	412	17	18	42	0.381455	0.403343	0.147121	0.0045762	0.00930779	1.05298	SH3 and multiple ankyrin repeat domains protein 3-like [Bos taurus]
a101344;12	308	2	28	17	6.02272e-05	0.000159888	3.87201	0.000817264	0.00197985	2.83559	NA
a101353;11	404	19	16	20	0.358005	0.385523	-0.183268	0.345574	0.377958	-0.177876	NA
a101354;13	445	16	17	49	0.381061	0.4033	0.152122	0.000273276	0.000734548	1.36283	NA
a101356;17	540	8	69	54	3.12287e-06	1.03153e-05	3.17318	1.28288e-06	5.16792e-06	2.50301	cyclin-dependent kinase 18 [Bos taurus]
a10135;126	3414	1665	1850	2618	4.30896e-06	1.39407e-05	0.216662	7.98694e-13	6.66898e-12	0.401066	PREDICTED: similar to unc-84 homolog A isoform 2 [Canis familiaris]
a101361;10	1076	80	26	47	1.59691e-07	6.27747e-07	-1.55683	4.48946e-05	0.00014126	-1.01922	NA
a101375;15	328	10	37	32	1.70592e-05	5.01175e-05	1.95218	0.00205881	0.00455896	1.4262	NA
a10137;179	1500	1241	1152	1349	0.234898	0.272405	-0.0427032	0.0102499	0.0189354	-0.13149	adenylosuccinate lyase [Bos taurus]
a101381;11	375	22	8	26	0.00755451	0.0133404	-1.39477	0.483109	0.487771	-0.0108687	NA
a101384;12	747	32	55	37	0.00375418	0.00709372	0.846019	0.446435	0.459499	-0.0424234	alpha-actinin-2 [Bos taurus]
a101388;18	321	38	19	24	0.00952533	0.0164083	-0.935341	0.00690353	0.0134085	-0.914842	zinc finger protein 234 [Bos taurus]
a101389;12	485	40	17	26	0.00193557	0.00386579	-1.16981	0.00755532	0.0144719	-0.873365	hCG1990708-like [Bos taurus]
a101390;13	397	33	8	22	6.16862e-05	0.000163095	-1.97973	0.0167082	0.0290952	-0.836839	NA
a101392;13	359	22	4	24	0.000238174	0.000568833	-2.39477	0.378374	0.405591	-0.126346	PREDICTED: ankyrin repeat domain 26-like [Bos taurus]
a10139;93	1637	514	508	1136	0.298298	0.332022	0.0477194	0	0	0.892246	NA
a101402;10	490	39	6	17	3.30975e-07	1.2476e-06	-2.63578	0.000157511	0.000443042	-1.44982	NA
a101408;13	669	67	19	28	1.84175e-07	7.1816e-07	-1.7535	5.24213e-07	2.22553e-06	-1.51061	unnamed protein product [Mus musculus]
a10140;60	2133	802	489	493	9.35577e-16	8.58787e-15	-0.649109	3.2947e-32	6.12757e-31	-0.953891	sestrin-1 [Bos taurus]
a101411;9	741	68	10	20	1.02713e-11	6.15326e-11	-2.70088	8.28761e-10	4.86026e-09	-2.01741	RAD50 homolog [Bos taurus]
a101419;17	327	23	25	22	0.328918	0.359777	0.184953	0.228999	0.272553	-0.316007	NA
a101420;16	312	35	10	11	0.000140581	0.000350448	-1.7427	1.53783e-05	5.27333e-05	-1.92173	NA
a101427;15	344	14	28	22	0.0108163	0.0184282	1.06466	0.21595	0.259144	0.4002	NA
a101428;14	590	86	16	14	1.30291e-12	8.84355e-12	-2.36161	2.71081e-17	3.14069e-16	-2.87079	NA
a10142;157	1121	868	615	1066	5.25558e-09	2.43004e-08	-0.432449	0.250432	0.293272	0.0445637	serine/threonine-protein kinase PAK 4 [Bos taurus]
a101430;16	688	23	44	75	0.00299438	0.00574187	1.00053	3.23631e-06	1.23187e-05	1.45338	NA
a101439;11	400	4	23	30	8.17231e-05	0.000212278	2.58822	3.22928e-05	0.000104079	2.65501	NA
a10143;129	1864	902	780	1618	0.0198862	0.0317082	-0.144994	1.22569e-13	1.14151e-12	0.591136	pleckstrin homology domain-containing family H member 3 [Bos taurus]
a101440;13	651	64	11	42	3.00734e-10	1.56469e-09	-2.47591	0.00120111	0.00280513	-0.859559	NA
a101441;11	417	19	10	31	0.0632258	0.0883532	-0.86134	0.143828	0.185514	0.454392	serine/threonine-protein kinase Chk2 [Bos taurus]
a101442;15	1116	72	72	83	0.393466	0.413715	0.0646592	0.41693	0.436741	-0.0467623	Cas-Br-M (murine) ecotropic retroviral transforming sequence b [Bos taurus]
a101445;12	337	25	4	20	4.86726e-05	0.000131912	-2.5792	0.0915371	0.126705	-0.573805	NA
a101450;15	450	35	35	20	0.424858	0.441533	0.0646592	0.00382975	0.00794919	-1.05923	PREDICTED: hypothetical protein LOC100424988 [Macaca mulatta]
a101455;15	554	59	17	23	1.16448e-06	4.08389e-06	-1.73052	7.914e-07	3.27247e-06	-1.61096	PREDICTED: GTP-binding protein 10-like [Ailuropoda melanoleuca]
a10145;88	2126	808	708	1076	0.0449639	0.0655294	-0.125947	0.00808181	0.0153689	0.161374	metastasis-associated protein 2-like [Bos taurus]
a101460;16	464	29	40	15	0.06633	0.0922188	0.528606	0.00362271	0.00755264	-1.20297	dual oxidase 2-like [Bos taurus]
a101464;11	369	11	29	7	0.00137023	0.00282335	1.46321	0.0965924	0.132487	-0.903953	NA
a101469;12	337	13	10	19	0.308483	0.341052	-0.313852	0.29402	0.332474	0.295611	NA
a101475;18	557	29	42	69	0.0422817	0.0619291	0.598996	0.000642078	0.00159672	0.998667	NA
a101478;10	554	21	35	15	0.0211684	0.0335685	0.801625	0.0642598	0.0937774	-0.737304	NA
a101486;12	382	9	21	24	0.0106785	0.0182332	1.28705	0.0175009	0.0303513	1.16316	NA
a10148;149	895	706	497	669	7.0988e-08	2.90784e-07	-0.441763	1.14508e-05	3.99887e-05	-0.329539	HD domain-containing protein 3 [Bos taurus]
a101490;12	380	13	21	25	0.0683958	0.0946408	0.756537	0.0822403	0.115846	0.69154	NA
a101495;11	557	28	36	20	0.120317	0.154483	0.427229	0.0394958	0.0616759	-0.737304	PREDICTED: alpha-actinin-3-like isoform 1 [Sus scrofa]
a101497;12	323	36	3	5	2.07187e-08	9.01463e-08	-3.5203	1.13083e-08	5.87862e-08	-3.09987	NA
a10149;100	1989	1374	575	943	5.04263e-68	1.46385e-66	-1.19209	6.36836e-40	1.37798e-38	-0.794929	interferon gamma receptor 1 [Bos taurus]
a1014;409	3772	7707	6421	7057	1.60634e-16	1.53294e-15	-0.198712	1.36959e-57	3.76029e-56	-0.378991	PREDICTED: similar to PHAPII (Putative HLA DR Associated Protein II) [Monodelphis domestica]
a101500;13	619	54	12	45	1.33959e-07	5.30971e-07	-2.10527	0.0379987	0.0597714	-0.514911	NA
a101501;9	422	8	34	16	1.43213e-05	4.28387e-05	2.15212	0.120482	0.159553	0.748123	NA
a101502;14	350	28	14	21	0.0225448	0.0355115	-0.935341	0.0537585	0.0807409	-0.666914	NA
a101505;15	367	42	13	16	7.20642e-05	0.000188485	-1.62722	2.04359e-05	6.83744e-05	-1.64419	NA
a101506;12	594	39	12	42	0.000119921	0.000302104	-1.63578	0.322361	0.357449	-0.144962	ribosomal protein S6 kinase, 90kDa, polypeptide 6 [Bos taurus]
a101511;11	576	44	20	24	0.00233265	0.0045979	-1.07284	0.000828365	0.00200382	-1.12635	NA
a101523;14	552	8	45	53	3.15177e-06	1.03898e-05	2.55651	1.29754e-06	5.22462e-06	2.47604	NA
a101524;15	314	36	17	10	0.00722846	0.0128178	-1.0178	3.70711e-06	1.39626e-05	-2.09987	NA
a101527;14	1173	117	21	90	5.98525e-17	5.88556e-16	-2.41339	0.00086485	0.00208433	-0.630388	cysteine-rich secretory protein LCCL domain-containing 1 [Bos taurus]
a101533;12	432	32	17	18	0.0240718	0.0375435	-0.847878	0.00475657	0.00961137	-1.08195	NA
a101534;10	346	4	21	14	0.00020068	0.000484779	2.45698	0.0246112	0.0409337	1.55548	NA
a101536;6	439	16	7	6	0.0406457	0.059736	-1.12799	0.00571268	0.0113184	-1.66691	NA
a101537;14	490	42	46	2	0.262505	0.298784	0.195904	6.87249e-13	5.7906e-12	-4.64419	NA
a10153;138	1448	819	907	1034	0.00114739	0.0023987	0.211898	0.105792	0.143255	0.0844241	RecName: Full=UPF0552 protein C15orf38 homolog
a101540;13	464	14	22	35	0.0729677	0.099913	0.716736	0.0081387	0.0154717	1.07005	NA
a101547;13	326	10	3	45	0.0346072	0.0519438	-1.67231	1.25609e-05	4.36142e-05	1.91805	NA
a10154;95	4973	2180	2088	2423	0.477682	0.481426	0.00245282	0.00979793	0.0182114	-0.0994105	DEAH (Asp-Glu-Ala-His) box polypeptide 8 [Bos taurus]
a101558;16	385	59	9	11	3.4849e-10	1.80038e-09	-2.64806	1.34941e-11	9.4088e-11	-2.67509	NA
a10155;126	657	255	381	503	1.25714e-08	5.59111e-08	0.643953	9.64517e-12	6.85404e-11	0.728184	NA
a101562;14	929	96	11	59	8.03969e-18	8.24412e-17	-3.06087	2.42235e-05	8.00464e-05	-0.954196	NA
a101573;14	349	45	6	15	1.2568e-08	5.59162e-08	-2.84223	2.19022e-06	8.54312e-06	-1.83684	NA
a101579;12	1223	47	67	98	0.0174862	0.0282566	0.57616	0.000638524	0.00158881	0.808244	baculoviral IAP repeat-containing 6 [Bos taurus]
a101580;13	616	49	37	37	0.140494	0.176283	-0.340597	0.0177371	0.0307224	-0.657133	NA
a101584;14	644	48	28	52	0.0181417	0.0292235	-0.712948	0.315326	0.351888	-0.1364	suppressor of cytokine signaling 3 [Macaca mulatta]
a101585;13	770	76	27	38	1.48249e-06	5.122e-06	-1.42838	3.31066e-06	1.25788e-05	-1.25188	fms-related tyrosine kinase 4 [Bos taurus]
a10159;208	662	691	544	677	0.000338058	0.000779089	-0.28042	0.000154888	0.000436351	-0.281407	carbonyl reductase [NADPH] 3 [Bos taurus]
a101601;13	644	51	18	44	6.29081e-05	0.000165995	-1.43784	0.0580699	0.0860805	-0.46487	NA
a101602;10	306	11	10	18	0.457751	0.467843	-0.0728443	0.211475	0.25472	0.458617	NA
a101603;11	577	22	42	23	0.00370715	0.00701403	0.997545	0.327214	0.361931	-0.187746	NA
a101605;9	427	2	35	16	6.01034e-05	0.000159792	4.19394	0.00133024	0.00307484	2.74812	NA
a101606;11	384	7	28	26	9.88888e-05	0.000251944	2.06466	0.00219113	0.00480797	1.64121	PREDICTED: hypothetical protein LOC100391524 [Callithrix jacchus]
a101611;13	589	74	16	16	4.91881e-10	2.50365e-09	-2.14479	5.22311e-13	4.47651e-12	-2.46133	NA
a101612;17	327	42	17	20	0.000964247	0.0020434	-1.2402	0.00024417	0.000662147	-1.32227	NA
a101617;10	677	41	22	30	0.0135089	0.0224872	-0.833461	0.0206969	0.0351944	-0.702538	NA
a101620;12	425	38	2	27	8.91e-10	4.43249e-09	-4.18327	0.019412	0.0333145	-0.744917	FAST kinase domain-containing protein 3 [Bos taurus]
a101624;11	676	40	59	7	0.0166596	0.0270624	0.625374	1.29728e-08	6.69748e-08	-2.76645	PREDICTED: similar to Cas-Br-M (murine) ecotropic retroviral transforming sequence, partial [Ornithorhynchus anatinus]
a10162;141	2576	1363	1714	2037	3.04445e-12	1.93978e-11	0.395241	3.44212e-11	2.31508e-10	0.327784	PREDICTED: 7SK snRNA methylphosphate capping enzyme-like [Sus scrofa]
a101631;10	562	32	26	17	0.271592	0.307332	-0.234901	0.00297386	0.00635184	-1.16441	interleukin-1 receptor-like 1 Fit-1S-like [Bos taurus]
a101635;9	308	7	18	10	0.010794	0.0184017	1.42723	0.370253	0.398835	0.262696	NA
a101638;11	802	27	48	30	0.004439	0.00826578	0.894734	0.392258	0.417087	-0.0998737	RecName: Full=Ammonium transporter Rh type B; AltName: Full=Rhesus blood group family type B glycoprotein; Short=Rh family type B glycoprotein; Short=Rh type B glycoprotein
a10163;103	1154	583	585	521	0.20474	0.242785	0.0696	9.37245e-07	3.8427e-06	-0.414089	coiled-coil domain-containing protein 43 [Bos taurus]
a101644;14	461	22	38	24	0.0127902	0.0214449	0.853155	0.378374	0.405591	-0.126346	NA
a101647;11	369	9	26	16	0.00128101	0.00265186	1.59517	0.175919	0.219663	0.578198	PREDICTED: potassium channel subfamily K member 12-like, partial [Sus scrofa]
a10164;92	1124	725	257	490	3.114e-48	7.07463e-47	-1.43155	5.77913e-23	8.30727e-22	-0.817076	PREDICTED: ubiquitin-conjugating enzyme E2v2-like [Oryctolagus cuniculus]
a101651;14	301	32	2	15	3.65606e-08	1.54989e-07	-3.93534	0.00103946	0.00246137	-1.34499	NA
a101656;14	941	73	65	43	0.339524	0.368319	-0.102798	9.60437e-05	0.000282087	-1.01544	PREDICTED: hypothetical protein [Bos taurus]
a10165;185	2799	2042	2338	2898	1.28754e-09	6.31278e-09	0.259951	5.29206e-10	3.15992e-09	0.253198	transcription factor Sp1 [Bos taurus]
a101664;18	637	73	35	43	0.000287094	0.000674906	-0.995882	9.60437e-05	0.000282087	-1.01544	NA
a101667;13	635	42	35	33	0.276293	0.311482	-0.198375	0.0363089	0.0574926	-0.5998	NA
a101668;13	322	27	12	22	0.01207	0.0203783	-1.10527	0.0923569	0.127643	-0.547333	NA
a101669;15	452	16	42	35	0.000153815	0.000380618	1.45698	0.0207777	0.0353183	0.877406	NA
a10166;148	1774	1042	1239	1266	1.01598e-07	4.08538e-07	0.31448	0.315996	0.352352	0.0290454	RNA-binding motif, single-stranded-interacting protein 2 [Bos taurus]
a101674;17	351	37	31	10	0.296251	0.330346	-0.190598	2.12327e-06	8.29581e-06	-2.1394	NA
a101676;12	827	99	22	15	1.2712e-12	8.64085e-12	-2.10527	2.54616e-20	3.36099e-19	-2.97434	centrosomal protein of 290 kDa [Felis catus]
a101684;12	651	36	36	36	0.423827	0.440676	0.0646592	0.227253	0.270878	-0.251877	NA
a101689;16	668	35	44	65	0.113695	0.147235	0.394808	0.0163878	0.0286643	0.641208	PREDICTED: cadherin EGF LAG seven-pass G-type receptor 1-like [Bos taurus]
a101692;16	1244	135	39	98	3.7474e-13	2.74416e-12	-1.72675	8.57619e-05	0.000255277	-0.713983	NA
a101696;10	405	23	13	20	0.0650095	0.0905289	-0.758463	0.150663	0.192562	-0.453511	NA
a101699;14	420	6	46	14	9.22671e-06	2.84306e-05	3.00326	0.0866343	0.121182	0.970516	NA
a101701;18	380	13	28	47	0.00656855	0.0117576	1.17157	6.88608e-05	0.00020845	1.60227	NA
a101708;15	832	81	21	56	2.07543e-09	9.97856e-09	-1.88287	0.000794462	0.00193003	-0.784372	NA
a10170;107	1163	568	620	542	0.0112756	0.0191426	0.191037	0.000112641	0.000326423	-0.319475	RecName: Full=UPF0454 protein C12orf49 homolog; Flags: Precursor
a101711;10	691	23	36	43	0.0317096	0.0480981	0.711022	0.0401294	0.0625768	0.650826	NA
a101713;14	422	44	26	6	0.0251764	0.0391389	-0.694333	2.45124e-10	1.5118e-09	-3.12635	WAS protein homolog associated with actin, golgi membranes and microtubules [Bos taurus]
a101715;15	392	30	5	39	1.1548e-05	3.4983e-05	-2.5203	0.365022	0.394511	0.126635	SEC22 vesicle trafficking protein homolog A [Bos taurus]
a101716;9	351	16	8	17	0.0672946	0.0934158	-0.935341	0.366468	0.395487	-0.164414	NA
a101718;11	467	28	11	23	0.00487016	0.0089467	-1.28326	0.092612	0.127915	-0.53567	p101 protein-like [Bos taurus]
a10171;78	1888	620	758	671	2.67203e-06	8.91487e-06	0.354589	0.0430733	0.0666942	-0.137832	NA
a101720;15	708	67	32	45	0.000462798	0.00104288	-1.00143	0.00133917	0.00309271	-0.826113	NA
a101722;12	413	50	5	9	1.62502e-10	8.6453e-10	-3.25727	3.04249e-10	1.85503e-09	-2.72581	NA
a101723;14	666	30	39	58	0.103147	0.135168	0.443171	0.0148515	0.026342	0.699214	PREDICTED: ectonucleoside triphosphate diphosphohydrolase 7 [Sus scrofa]
a101729;18	443	31	24	46	0.221533	0.258877	-0.304575	0.175571	0.219368	0.317489	NA
a10172;99	2177	753	909	1497	1.06088e-06	3.73483e-06	0.33629	2.61013e-13	2.33035e-12	0.739476	guanine nucleotide-binding protein subunit beta-like protein 1 [Bos taurus]
a101730;17	867	213	0	0	4.35447e-63	1.20294e-61	0/unlimited	1.29694e-73	4.03184e-72	0/unlimited	NA
a101732;16	307	19	28	18	0.0726676	0.0995645	0.624087	0.240947	0.284573	-0.329879	NA
a101738;15	334	24	13	14	0.0489479	0.0703946	-0.819864	0.0156604	0.0275553	-1.02948	NA
a101741;15	730	43	25	64	0.0232308	0.0364099	-0.717749	0.131136	0.171924	0.321858	NA
a101746;14	382	3	39	10	3.92533e-05	0.000108259	3.7651	0.0574885	0.0853887	1.48509	NA
a101748;14	836	74	48	40	0.0177068	0.028599	-0.559832	1.85672e-05	6.25546e-05	-1.1394	NA
a101749;10	478	9	31	30	0.000127294	0.00031945	1.84893	0.00213006	0.0047001	1.48509	PREDICTED: tetratricopeptide repeat protein GNN-like [Ailuropoda melanoleuca]
a101750;14	606	32	20	53	0.0681556	0.0944255	-0.613413	0.0710704	0.102249	0.476044	NA
a101754;15	343	18	18	30	0.445425	0.458153	0.0646592	0.13342	0.174513	0.485089	NA
a101755;13	623	79	20	29	2.11773e-09	1.0177e-08	-1.91719	3.83903e-09	2.10077e-08	-1.69768	NA
a101759;12	715	25	34	57	0.0907009	0.121046	0.508266	0.00280219	0.00601197	0.937157	MDN1, midasin homolog-like [Bos taurus]
a10175;109	3566	2074	1346	2055	2.30917e-29	3.5825e-28	-0.559078	1.78962e-09	1.01329e-08	-0.265154	PREDICTED: similar to carboxypeptidase D precursor [Canis familiaris]
a101764;15	509	50	22	23	0.000885641	0.00189811	-1.11977	4.46495e-05	0.000140569	-1.37217	NA
a10176;131	1715	1453	631	1013	6.67653e-67	1.92113e-65	-1.13866	3.85924e-40	8.38382e-39	-0.772277	protein-L-isoaspartate O-methyltransferase domain-containing protein 1 [Bos taurus]
a101772;13	308	32	4	16	1.03471e-06	3.6512e-06	-2.93534	0.00179312	0.00403234	-1.25188	NA
a101775;14	766	56	36	62	0.0311348	0.047352	-0.572771	0.343339	0.375932	-0.105035	NA
a10177;143	543	389	379	350	0.397045	0.41696	0.0270869	7.00068e-05	0.000211554	-0.404292	NA
a101783;14	937	80	46	56	0.00270033	0.00524715	-0.733707	0.00104852	0.00247906	-0.76645	GTP-binding protein GUF1 homolog [Bos taurus]
a101784;10	569	8	58	14	3.12289e-06	1.03081e-05	2.92264	0.202236	0.245118	0.555478	NA
a101787;12	306	4	18	13	0.000939741	0.00199689	2.23458	0.0365224	0.0577674	1.44856	NA
a101790;16	361	3	44	26	3.92526e-05	0.000108336	3.93913	5.90778e-05	0.000180836	2.8636	NA
a101794;12	475	48	10	20	3.2295e-07	1.21945e-06	-2.19838	1.77635e-05	6.00012e-05	-1.51491	NA
a101796;12	350	0	26	23	4.04089e-09	1.89272e-08	0/unlimited	4.42066e-07	1.88968e-06	0/unlimited	BWK3 [Rattus norvegicus]
a10179;175	1092	577	914	1202	5.21583e-13	3.72723e-12	0.728282	1.48437e-13	1.36829e-12	0.806917	thyroid receptor-interacting protein 6 [Bos taurus]
a1017;416	7087	13083	11053	17447	4.18643e-22	5.13175e-21	-0.178596	0	0	0.163409	MLLT4 [Bos taurus]
a101801;8	626	14	19	43	0.161509	0.198424	0.505232	0.000598803	0.0014966	1.36703	WC1 [Bos taurus]
a101804;12	377	17	12	32	0.215088	0.252862	-0.437841	0.0642371	0.0937833	0.66066	NA
a101809;17	730	129	14	25	6.4428e-24	8.4209e-23	-3.13921	7.20386e-23	1.0307e-21	-2.61925	NA
a10181;101	3475	2025	1055	1882	1.09044e-60	2.922e-59	-0.87602	4.87356e-15	5.0566e-14	-0.357532	protein pellino homolog 1 [Homo sapiens]
a101822;19	531	39	26	71	0.0776185	0.105619	-0.520303	0.0160208	0.0281225	0.612468	NA
a101828;12	303	13	15	17	0.311324	0.343663	0.27111	0.40949	0.430905	0.135146	uridine phosphorylase 1 [Bos taurus]
a101829;14	492	26	34	28	0.115097	0.148703	0.451682	0.351826	0.383311	-0.144962	ribonucleoprotein, PTB-binding 2-like [Bos taurus]
a101830;17	333	31	16	29	0.0214501	0.0339636	-0.889537	0.17361	0.217219	-0.348092	NA
a101838;11	358	3	31	19	3.93603e-05	0.000108411	3.43389	0.00104264	0.00246676	2.41109	NA
a10183;142	1753	1040	1194	1206	7.87769e-06	2.4558e-05	0.263879	0.264907	0.306554	-0.0382304	PREDICTED: arfaptin-2 isoform 1 [Callithrix jacchus]
a101840;15	423	46	13	28	1.30197e-05	3.9196e-05	-1.75846	0.00224194	0.00490828	-0.968084	NA
a101847;14	531	12	56	36	3.19866e-07	1.20892e-06	2.28705	0.00187245	0.00418668	1.33309	NA
a10184;146	609	368	356	455	0.437264	0.452111	0.0168307	0.297159	0.334929	0.054284	PREDICTED: CREB-binding protein-like [Sus scrofa]
a101850;11	446	29	10	26	0.00175437	0.00353103	-1.47139	0.145432	0.187184	-0.409418	NA
a101852;15	517	47	20	37	0.00086566	0.00185776	-1.168	0.0292953	0.0476474	-0.597012	angiopoietin-like protein 4 [Bos taurus]
a101854;11	796	57	32	26	0.00737491	0.0130568	-0.768231	1.25462e-05	4.35785e-05	-1.38433	PREDICTED: FYN binding protein (FYB-120/130) [Oryctolagus cuniculus]
a101857;15	540	68	14	30	1.1551e-09	5.68898e-09	-2.21545	1.13975e-06	4.61709e-06	-1.43245	PREDICTED: PH-interacting protein-like [Sus scrofa]
a101859;11	587	14	19	60	0.161509	0.198424	0.505232	9.33119e-07	3.82643e-06	1.84766	PREDICTED: collagen type VI alpha 6-like [Bos taurus]
a10185;104	1050	277	1064	300	1.68754e-13	1.30123e-12	2.0062	0.126994	0.167141	-0.1368	retinoic acid receptor responder (tazarotene induced) 1 [Bos taurus]
a101861;10	326	19	4	8	0.00110857	0.00232546	-2.18327	0.00521371	0.0104257	-1.4998	NA
a101870;16	909	103	34	64	4.53461e-09	2.1143e-08	-1.53438	1.65969e-05	5.63533e-05	-0.938377	NFKB activating protein [Bos taurus]
a101872;12	919	66	37	47	0.00423362	0.00790959	-0.770282	0.0033157	0.00697565	-0.741682	lysM and putative peptidoglycan-binding domain-containing protein 1 [Bos taurus]
a10187;31	630	107	76	78	0.0235052	0.0367895	-0.42888	0.00044998	0.00115163	-0.707942	NA
a101880;8	339	24	2	4	4.71227e-06	1.51527e-05	-3.5203	7.23462e-06	2.60597e-05	-2.83684	NA
a101886;15	376	38	5	22	1.49782e-07	5.90472e-07	-2.86134	0.00307926	0.00655118	-1.04037	NA
a10188;52	2823	1286	280	492	7.73619e-145	3.23117e-143	-2.13473	2.94904e-115	1.09075e-113	-1.63804	PREDICTED: similar to Activated RNA polymerase II transcriptional coactivator p15 (Positive cofactor 4) (PC4) (p14) [Canis familiaris]
a101890;15	331	17	18	12	0.381455	0.403343	0.147121	0.0817148	0.115277	-0.754377	NA
a101892;11	683	31	41	32	0.086481	0.116004	0.468015	0.282405	0.321434	-0.206073	toll-like receptor 1 [Ovis aries]
a101903;11	964	59	42	45	0.0722122	0.0990082	-0.425666	0.0118242	0.0214782	-0.642667	NA
a101904;15	709	72	43	30	0.00686089	0.0122445	-0.679001	1.95491e-07	8.77107e-07	-1.51491	tigger transposable element derived 6-like [Bos taurus]
a101910;9	392	14	24	8	0.0403367	0.0593342	0.842267	0.0469845	0.0717941	-1.05923	NA
a101918;15	556	17	48	38	2.389e-05	6.84515e-05	1.56216	0.0142463	0.0253841	0.908588	NA
a10191;98	9627	3704	4391	5387	0	0	0.310125	5.84777e-12	4.28415e-11	0.288521	hect domain and RLD 3-like [Bos taurus]
a101922;15	526	12	67	22	3.13246e-07	1.18559e-06	2.54579	0.118466	0.157248	0.622592	NA
a101935;12	494	1	32	43	0.000285734	0.000673046	5.06466	0.000292737	0.000782491	5.17439	NA
a101942;19	359	19	24	31	0.183403	0.221532	0.401694	0.143828	0.185514	0.454392	NA
a101948;12	315	9	18	21	0.0336827	0.0507096	1.06466	0.0450009	0.0691828	0.970516	NA
a101949;18	435	52	19	40	8.13109e-05	0.000211437	-1.38785	0.0183933	0.0317092	-0.630388	NA
a101953;14	586	24	20	64	0.328339	0.359276	-0.198375	0.000228323	0.000621989	1.16316	iroquois-class homeodomain protein IRX-6 [Bos taurus]
a101957;14	652	42	32	36	0.168343	0.205962	-0.327658	0.0731732	0.104785	-0.474269	NA
a101963;13	318	11	33	18	0.000239657	0.000571625	1.64962	0.211475	0.25472	0.458617	NA
a101969;19	382	44	32	23	0.120601	0.154637	-0.394772	0.000515096	0.00130274	-1.18775	tumor necrosis factor receptor superfamily member 6 [Ovis aries]
a10196;187	1162	802	988	1184	4.48095e-08	1.87987e-07	0.365568	1.15385e-06	4.67228e-06	0.310118	stAR-related lipid transfer protein 5 [Bos taurus]
a101974;16	377	35	23	27	0.0817706	0.110514	-0.541062	0.0443032	0.0683648	-0.626272	PREDICTED: similar to Cyclin H (MO15-associated protein) (p37) (p34) [Canis familiaris]
a101975;10	549	37	10	21	5.79085e-05	0.000154702	-1.82287	0.00286219	0.00613252	-1.06901	NA
a10197;162	1752	1721	598	1656	6.09413e-115	2.30078e-113	-1.46037	3.01489e-10	1.83911e-09	-0.307421	paraspeckle component 1 [Bos taurus]
a101982;13	361	17	22	17	0.175577	0.213133	0.436628	0.301598	0.339165	-0.251877	NA
a101991;17	335	10	33	13	0.000111375	0.000281797	1.78713	0.42858	0.445877	0.126635	NA
a101993;13	605	37	25	49	0.0906992	0.121062	-0.500938	0.317968	0.353916	0.15338	NA
a1019;1175	1626	8330	8523	9861	5.51759e-06	1.75447e-05	0.0977041	0.346482	0.3785	-0.00845929	unnamed protein product [Mus musculus]
a101;18229	565	38127	51110	50387	9.29308e-11	5.0549e-10	0.487452	7.91047e-11	5.11515e-10	0.150362	40S ribosomal protein S18 [Mus musculus]
a102001;12	374	17	24	17	0.110059	0.143134	0.562159	0.301598	0.339165	-0.251877	NA
a102004;10	795	80	15	18	8.7107e-12	5.26393e-11	-2.35038	1.35999e-13	1.25919e-12	-2.40388	NA
a102006;12	336	10	11	23	0.374988	0.399446	0.202163	0.0402643	0.0627692	0.949757	NA
a10200;142	3530	3042	1681	2539	5.06153e-76	1.5636e-74	-0.791041	2.1136e-40	4.62431e-39	-0.512637	envelope [Orcinus orca]
a102010;13	499	23	32	27	0.0850989	0.114591	0.541097	0.473712	0.480174	-0.0205512	PREDICTED: cytoplasmic polyadenylation element-binding protein 3 [Sus scrofa]
a102013;13	782	35	49	55	0.0420611	0.0616363	0.550086	0.101437	0.13829	0.4002	NA
a102015;11	363	6	11	28	0.100964	0.132987	0.939128	0.000402326	0.00103945	1.97052	NA
a102016;8	432	5	13	21	0.0254396	0.039515	1.44317	0.00316446	0.00671369	1.81851	Rhesus-like protein [Bos taurus]
a102018;17	426	23	36	39	0.0317096	0.0480981	0.711022	0.0911028	0.126465	0.509964	NA
a10201;144	1228	891	674	855	2.04381e-06	6.93622e-06	-0.338018	3.2636e-06	1.24168e-05	-0.311378	ephrin-A4 [Bos taurus]
a10202;105	3378	1346	1695	2031	1.49558e-12	1.00575e-11	0.397266	8.09275e-12	5.79784e-11	0.341635	Rap guanine nucleotide exchange factor (GEF) 1-like [Bos taurus]
a102035;12	746	64	15	35	2.14826e-08	9.33212e-08	-2.02845	7.57353e-05	0.000227597	-1.12259	NA
a102037;14	325	17	8	32	0.0481388	0.0694955	-1.0228	0.0642371	0.0937833	0.66066	cytochrome P450, family 2, subfamily J, polypeptide 2 [Bos taurus]
a102045;11	394	31	4	22	1.81235e-06	6.18596e-06	-2.88954	0.0308121	0.0498035	-0.746641	NA
a102048;14	472	25	20	44	0.279634	0.314559	-0.257269	0.0598604	0.088348	0.563699	ATP-dependent DNA helicase Q4 [Bos taurus]
a102051;10	318	5	12	22	0.0393427	0.0581131	1.32769	0.00207176	0.0045832	1.88563	hypothetical protein MGC45491, isoform CRA_b [Homo sapiens]
a10205;105	3042	1294	1128	2066	0.011574	0.0196235	-0.133411	1.389e-12	1.11533e-11	0.423126	prolactin regulatory element binding protein [Bos taurus]
a102062;14	356	28	12	25	0.00855073	0.0149016	-1.15773	0.146435	0.188359	-0.415375	PREDICTED: spectrin repeat containing, nuclear envelope 1 [Bos taurus]
a102065;12	446	10	27	31	0.00165513	0.00335424	1.49762	0.00294705	0.00630115	1.38039	NA
a102071;14	460	3	18	63	0.000334442	0.000771879	2.64962	2.78717e-05	9.11574e-05	4.14044	hypothetical protein LOC100137824 [Bos taurus]
a102076;14	861	89	50	34	0.00113552	0.00237535	-0.767218	1.09702e-09	6.34707e-09	-1.64015	NA
a102077;15	338	31	10	30	0.000775478	0.00167627	-1.56761	0.207082	0.250229	-0.299182	NA
a102079;16	357	18	39	15	0.00156609	0.003201	1.18014	0.152458	0.193966	-0.514911	NA
a102092;12	614	47	17	31	0.000153214	0.000379303	-1.40247	0.00492917	0.0099031	-0.852269	Dmx-like 1 [Bos taurus]
a102096;14	433	17	16	45	0.48426	0.486747	-0.0228036	0.00183976	0.00412514	1.15251	NA
a102098;18	347	29	7	42	0.000160398	0.000395186	-1.98597	0.213416	0.256705	0.28246	6720455I24Rik homolog [Bos taurus]
a102100;11	461	36	15	15	0.002641	0.00515132	-1.19838	0.000175538	0.000490197	-1.51491	NA
a102102;16	327	17	15	36	0.413834	0.43195	-0.115913	0.024208	0.0404342	0.830585	NA
a102108;13	818	34	48	62	0.0406543	0.0597245	0.562159	0.0223598	0.0377056	0.614857	NA
a10210;141	777	378	544	551	3.69272e-10	1.90424e-09	0.58988	0.00118613	0.00277774	0.291789	PREDICTED: UPF0545 protein C22orf39-like [Sus scrofa]
a102111;12	652	57	21	32	4.32421e-05	0.000118172	-1.37591	0.00025417	0.000687009	-1.08477	NA
a102112;12	1142	33	37	117	0.253434	0.289961	0.229718	1.03322e-09	5.99807e-09	1.57409	NA
a102114;16	866	68	57	68	0.233278	0.270949	-0.189914	0.153162	0.194763	-0.251877	coiled-coil and C2 domain containing 2A [Bos taurus]
a102115;17	610	79	16	39	4.29509e-11	2.41546e-10	-2.23912	1.68463e-06	6.67546e-06	-1.27026	NA
a102117;15	738	79	23	46	2.60022e-08	1.12166e-07	-1.71556	4.20355e-05	0.000132971	-1.0321	protocadherin 9-like [Bos taurus]
a10211;95	1686	697	609	975	0.0520768	0.0745203	-0.130057	0.00056507	0.00142101	0.232367	metalloreductase STEAP3-like [Bos taurus]
a102121;13	521	7	57	25	5.40953e-06	1.72614e-05	3.09019	0.00324268	0.00685373	1.58462	NA
a102123;14	725	28	66	52	1.54693e-05	4.59606e-05	1.3017	0.0284578	0.0465457	0.641208	Coiled-coil domain containing 78-like [Bos taurus]
a102124;13	1209	110	45	62	2.78122e-07	1.05861e-06	-1.22485	7.33863e-07	3.05008e-06	-1.07904	GSK-3 binding protein FRAT2-like [Bos taurus]
a10213;77	2452	769	912	970	5.22998e-06	1.67255e-05	0.310709	0.116757	0.155877	0.0831244	RecName: Full=Transmembrane and ubiquitin-like domain-containing protein 2
a102143;17	951	134	15	76	1.82084e-24	2.43695e-23	-3.09454	6.45039e-08	3.07796e-07	-1.07004	ankyrin repeat and SAM domain-containing protein 4B [Bos taurus]
a102144;15	415	47	18	14	0.000283265	0.000668063	-1.32	3.34073e-07	1.45386e-06	-1.99911	NA
a102145;13	418	51	6	16	4.3872e-10	2.24797e-09	-3.0228	2.20426e-07	9.8252e-07	-1.9243	PREDICTED: hypothetical protein [Bos taurus]
a102148;14	583	66	20	24	6.14765e-07	2.23253e-06	-1.65781	5.63283e-08	2.7044e-07	-1.71131	NA
a10214;59	3752	964	913	1417	0.418485	0.435952	-0.013759	1.98478e-07	8.8998e-07	0.303858	DNA-directed RNA polymerase I subunit RPA2 [Bos taurus]
a102150;17	384	45	12	32	8.80443e-06	2.7213e-05	-1.84223	0.0123559	0.0223555	-0.74373	PREDICTED: dedicator of cytokinesis protein 7-like [Ailuropoda melanoleuca]
a102151;16	443	20	30	38	0.0590484	0.0831829	0.649622	0.0452655	0.0694786	0.674123	NA
a102153;12	344	18	16	19	0.419237	0.436532	-0.105266	0.352221	0.383647	-0.173874	PREDICTED: calmin (calponin-like, transmembrane), partial [Bos taurus]
a102157;8	308	12	4	8	0.030305	0.0462123	-1.5203	0.101026	0.137854	-0.836839	NA
a10215;73	528	149	117	117	0.0554532	0.0787461	-0.284145	0.000353997	0.000924382	-0.600681	NA
a102161;17	391	31	33	27	0.333919	0.364221	0.154857	0.116393	0.155463	-0.451186	NA
a102165;14	811	50	50	57	0.410695	0.429056	0.0646592	0.407227	0.429134	-0.0628429	dopey family member 1 [Bos taurus]
a102179;19	323	56	6	16	2.54315e-11	1.45605e-10	-3.15773	1.5252e-08	7.81054e-08	-2.05923	WW domain-binding protein 4 [Bos taurus]
a102182;13	818	54	21	70	0.000129981	0.00032586	-1.29791	0.323831	0.358751	0.122519	NA
a102190;15	1205	67	66	121	0.431113	0.446621	0.0429642	0.00285826	0.00612504	0.600897	NA
a102191;16	438	35	24	30	0.105955	0.1383	-0.479661	0.0923489	0.127661	-0.474269	NA
a10219;177	390	231	224	263	0.439989	0.454011	0.0202651	0.307913	0.345027	-0.0647068	SEC31 homolog A [Bos taurus]
a102200;14	437	48	14	18	1.21926e-05	3.6838e-05	-1.71295	4.64954e-06	1.72888e-05	-1.66691	NA
a102206;14	435	6	32	35	1.30586e-05	3.92974e-05	2.4797	2.1778e-05	7.25879e-05	2.29244	NA
a102209;14	535	66	9	22	7.85226e-12	4.78313e-11	-2.80981	1.24327e-08	6.43521e-08	-1.83684	NA
a102214;11	581	61	5	20	2.51304e-13	1.88855e-12	-3.54415	3.25057e-08	1.60407e-07	-1.86069	NA
a102219;12	1491	65	82	80	0.0473642	0.0684749	0.399843	0.4256	0.443694	0.0476835	F-box/LRR-repeat protein 2 [Bos taurus]
a102225;11	830	67	6	42	4.24161e-14	3.49328e-13	-3.41647	0.000471771	0.00120233	-0.925649	PREDICTED: structural maintenance of chromosomes 2 [Bos taurus]
a102226;17	527	49	51	25	0.335562	0.365024	0.122375	0.000195693	0.000541417	-1.22273	NA
a102230;14	624	34	55	34	0.00746607	0.0131977	0.758556	0.233524	0.277079	-0.251877	NA
a102233;12	530	49	19	18	0.000246542	0.000587562	-1.30212	2.86408e-06	1.09776e-05	-1.69666	NA
a102236;13	399	36	9	22	3.80359e-05	0.000105286	-1.93534	0.0062163	0.0121855	-0.96237	NA
a102244;13	510	28	25	33	0.40426	0.423676	-0.0988395	0.478288	0.48359	-0.0148376	NA
a102247;12	761	44	30	45	0.0770189	0.104928	-0.487882	0.234369	0.277796	-0.219455	NA
a10224;141	729	466	468	540	0.226392	0.264062	0.0708378	0.332316	0.366539	-0.0392473	NA
a102255;14	335	2	16	42	0.000317921	0.000739815	3.06466	4.84266e-05	0.000151148	4.14044	NA
a10225;153	713	354	531	559	1.6476e-11	9.61697e-11	0.649622	1.41635e-05	4.88027e-05	0.407222	unnamed protein product [Mus musculus]
a102261;13	397	28	20	22	0.162032	0.198945	-0.420768	0.0713772	0.10266	-0.5998	NA
a102268;13	639	54	16	40	4.4936e-06	1.45108e-05	-1.69023	0.011022	0.020132	-0.684836	NA
a102269;12	439	6	41	17	9.24767e-06	2.84818e-05	2.83725	0.0316883	0.05102	1.25062	hole protein-like [Bos taurus]
a102270;14	509	10	39	41	6.94385e-06	2.17761e-05	2.02813	6.44366e-05	0.00019589	1.78375	NA
a102272;16	403	23	21	18	0.441762	0.45552	-0.0665853	0.0902181	0.125459	-0.605514	NA
a102276;16	392	41	12	30	5.11526e-05	0.00013785	-1.70793	0.0206969	0.0351944	-0.702538	NA
a102277;15	498	8	46	42	3.13934e-06	1.03523e-05	2.58822	7.50639e-06	2.69625e-05	2.14044	NA
a102280;14	388	18	27	27	0.069284	0.0957875	0.649622	0.230685	0.274108	0.333086	NA
a102281;15	566	42	28	40	0.069952	0.0965331	-0.520303	0.154673	0.196326	-0.322266	NA
a102282;12	374	28	16	14	0.0498744	0.0715563	-0.742696	0.00324639	0.00685155	-1.25188	NA
a102289;13	473	36	13	22	0.000808371	0.00174136	-1.40483	0.0062163	0.0121855	-0.96237	NA
a10228;113	1639	891	691	1020	1.7144e-05	5.03515e-05	-0.30208	0.194715	0.238897	-0.0568049	chromosome 16 open reading frame 72 [Macaca mulatta]
a102298;14	323	22	17	11	0.258655	0.294849	-0.30731	0.00802548	0.0152715	-1.25188	NA
a1022;2805	872	9000	10994	12959	0	0	0.353379	0	0	0.274081	PREDICTED: similar to SH3 domain binding glutamic acid-rich protein like 3 [Canis familiaris]
a102301;13	420	8	12	52	0.16467	0.201931	0.649622	1.32103e-06	5.31485e-06	2.44856	NA
a102304;11	369	2	16	17	0.000317921	0.000739815	3.06466	0.000817264	0.00197985	2.83559	NA
a102309;8	1170	19	26	75	0.118064	0.152033	0.517171	1.61334e-07	7.33673e-07	1.72901	NA
a102319;12	432	24	16	28	0.134168	0.169393	-0.520303	0.46468	0.473594	-0.0294843	NA
a10231;141	331	30	60	170	0.000357192	0.000820337	1.06466	2.64677e-13	2.35856e-12	2.25062	Histidine-rich glycoprotein precursor [Brugia malayi]
a102323;15	676	83	20	34	3.3939e-10	1.75568e-09	-1.98845	1.74413e-08	8.87293e-08	-1.53945	NA
a102329;11	403	3	16	35	0.000968953	0.00205262	2.4797	2.81534e-05	9.18555e-05	3.29244	NA
a102336;13	698	7	59	67	5.40952e-06	1.72676e-05	3.13995	2.44089e-06	9.47273e-06	3.00686	NA
a10233;20	629	84	25	32	1.4879e-08	6.56421e-08	-1.6838	2.9161e-09	1.61544e-08	-1.64419	protein diaphanous homolog 3 [Bos taurus]
a102346;17	549	50	44	23	0.345921	0.374543	-0.119765	4.46495e-05	0.000140569	-1.37217	PREDICTED: zinc finger protein 500-like [Ailuropoda melanoleuca]
a10234;105	1990	802	829	1212	0.0577755	0.081765	0.112429	6.8851e-08	3.27696e-07	0.343839	zinc finger protein 354B-like [Bos taurus]
a102352;12	367	10	37	14	1.70592e-05	5.01175e-05	1.95218	0.359524	0.389624	0.23355	NA
a102357;14	722	17	78	48	1.55417e-08	6.84152e-08	2.2626	0.000706593	0.00173212	1.24562	sn1-specific diacylglycerol lipase alpha [Bos taurus]
a10235;90	3471	2388	772	1252	2.39577e-175	1.06783e-173	-1.56447	7.38011e-130	2.81223e-128	-1.18345	ATP-binding cassette sub-family D member 3 [Bos taurus]
a102360;12	333	23	16	16	0.167262	0.204755	-0.458903	0.0482821	0.073441	-0.775439	NA
a102362;11	583	38	13	31	0.000369145	0.000846088	-1.48283	0.0583513	0.0864363	-0.545608	NA
a102366;12	470	14	35	25	0.000767188	0.00165908	1.38659	0.115827	0.154871	0.584625	NA
a102367;14	327	5	25	21	7.44489e-05	0.000194422	2.38659	0.00316446	0.00671369	1.81851	NA
a102368;16	374	35	28	13	0.243542	0.280835	-0.257269	7.26029e-05	0.000218679	-1.68072	NA
a10236;94	330	48	115	95	1.13533e-08	5.07509e-08	1.32519	0.00178479	0.004016	0.733016	PREDICTED: fibrosin [Rattus norvegicus]
a102370;12	370	19	3	26	0.000357694	0.000821241	-2.59831	0.330313	0.364509	0.200635	NA
a102372;17	371	31	2	50	6.75573e-08	2.77611e-07	-3.88954	0.0937368	0.129004	0.437783	NA
a102377;13	369	24	24	17	0.437362	0.451841	0.0646592	0.0496211	0.075247	-0.749376	NA
a10237;164	455	334	308	354	0.323825	0.355163	-0.0522585	0.0632322	0.0924715	-0.167975	reverse transcriptase-like [Bos taurus]
a102383;13	326	3	43	7	3.92527e-05	0.000108276	3.90596	0.179546	0.223519	0.970516	NA
a10238;143	325	116	135	255	0.0602102	0.0846303	0.283494	8.76179e-09	4.61613e-08	0.884496	PREDICTED: similar to RAB43 [Monodelphis domestica]
a102391;16	352	29	17	32	0.0544299	0.0775149	-0.705859	0.378748	0.405912	-0.109858	NA
a102392;14	346	35	8	22	2.38431e-05	6.84069e-05	-2.06462	0.00872097	0.0164544	-0.921728	NA
a102395;14	337	14	36	13	0.000510347	0.00114201	1.42723	0.256477	0.298859	-0.358792	claspin homolog [Bos taurus]
a102399;13	573	10	50	35	1.02421e-06	3.61766e-06	2.38659	0.000677995	0.00166976	1.55548	NA
a10239;65	711	279	110	237	7.01413e-17	6.86705e-16	-1.2781	6.34204e-05	0.000193028	-0.487255	NA
a102403;11	343	20	7	26	0.00867392	0.0150823	-1.44991	0.391707	0.416646	0.126635	NA
a102408;12	878	68	35	38	0.00120493	0.00250858	-0.893521	6.73304e-05	0.000204239	-1.09141	RecName: Full=Uncharacterized protein C3orf26 homolog
a102410;16	323	31	9	26	0.000362514	0.000831569	-1.71961	0.0928784	0.128047	-0.505633	NA
a102420;16	306	26	6	24	0.000260149	0.000616431	-2.05082	0.182524	0.226669	-0.367354	NA
a102421;15	408	11	19	59	0.0586704	0.0827786	0.853155	2.37348e-07	1.05293e-06	2.17133	NA
a102426;12	346	43	1	7	3.39077e-12	2.14403e-11	-5.36161	1.9204e-09	1.08377e-08	-2.87079	NA
a102430;10	662	37	34	21	0.435485	0.450452	-0.0573313	0.00286219	0.00613252	-1.06901	NA
a102432;12	576	31	4	58	1.81235e-06	6.18596e-06	-2.88954	0.0204954	0.0348934	0.651908	NA
a10243;115	1518	894	741	843	0.00199104	0.00396577	-0.206142	5.83039e-07	2.45417e-06	-0.336619	PREDICTED: ATPase, H+ transporting, lysosomal V1 subunit C1 [Oryctolagus cuniculus]
a102440;16	558	14	55	51	1.76731e-07	6.90724e-07	2.03866	3.23228e-05	0.000104138	1.61319	NA
a102445;12	598	14	48	38	2.55537e-06	8.555e-06	1.84227	0.00319107	0.00675847	1.1887	NA
a10244;184	1745	1331	1214	1525	0.117297	0.151138	-0.0680829	0.151858	0.193573	-0.0555781	PREDICTED: hypothetical protein isoform 6 [Bos taurus]
a102457;16	400	37	28	28	0.177299	0.215008	-0.337439	0.0344451	0.05489	-0.653975	NA
a102458;14	325	22	12	22	0.0587516	0.0828313	-0.80981	0.278107	0.317159	-0.251877	NA
a102464;13	303	23	4	29	0.000140997	0.00035112	-2.4589	0.425909	0.443921	0.0825423	NA
a10246;108	925	295	478	595	5.02931e-13	3.60101e-12	0.760955	1.14686e-13	1.07074e-12	0.760298	NA
a102474;16	582	13	54	57	2.25261e-07	8.65249e-07	2.11911	1.32006e-06	5.3116e-06	1.88057	NA
a102479;13	345	14	20	30	0.125608	0.160356	0.579232	0.0339129	0.0542213	0.847659	NA
a102483;12	1094	79	38	77	0.000178454	0.00043497	-0.991194	0.104838	0.142316	-0.288871	RB-associated KRAB repressor-like [Bos taurus]
a102490;11	432	45	12	2	8.80443e-06	2.7213e-05	-1.84223	7.42935e-14	7.07199e-13	-4.74373	NA
a102491;14	787	72	32	44	9.83982e-05	0.000251137	-1.10527	0.000198509	0.000548081	-0.96237	NA
a102496;14	389	21	41	18	0.00331001	0.00630501	1.02989	0.15179	0.193539	-0.474269	NA
a10249;63	5025	1606	1208	1728	1.24917e-10	6.7174e-10	-0.346192	0.00172952	0.00390452	-0.146245	NA
a102506;11	408	8	15	30	0.0612801	0.0860541	0.97155	0.00100113	0.00238105	1.65501	NA
a102507;17	461	52	26	26	0.00296473	0.00570271	-0.935341	9.88139e-05	0.000289643	-1.25188	CDK5 regulatory subunit-associated protein 1-like 1 [Bos taurus]
a102510;13	315	5	15	29	0.0102059	0.017477	1.64962	9.847e-05	0.000288712	2.28418	NA
a102514;13	397	8	24	27	0.00151982	0.00311251	1.64962	0.00318172	0.00674375	1.50301	NA
a102519;13	583	57	28	18	0.00159587	0.00324177	-0.960876	5.0434e-08	2.43593e-07	-1.91484	NA
a10251;179	1404	673	517	2345	8.69099e-05	0.000224157	-0.315783	8.81517e-14	8.33061e-13	1.54903	fructose-1,6-bisphosphatase 1 [Bos taurus]
a102522;17	333	45	7	25	4.76911e-08	1.99684e-07	-2.61984	0.000900972	0.00216337	-1.09987	PREDICTED: hypothetical protein LOC722588 [Macaca mulatta]
a102524;15	793	89	22	51	1.35187e-10	7.25062e-10	-1.95164	1.0616e-05	3.72881e-05	-1.05518	PREDICTED: similar to TRM5 tRNA methyltransferase 5 homolog (S. cerevisiae) [Equus caballus]
a102529;16	303	2	18	40	0.000134959	0.000337092	3.23458	4.84285e-05	0.00015112	4.07005	NA
a10252;221	814	739	801	941	0.00696119	0.0124131	0.180887	0.0864906	0.121064	0.0967436	bromodomain containing protein 3 [Bos taurus]
a102532;12	351	25	10	9	0.00821848	0.0143856	-1.25727	0.000556002	0.00140007	-1.72581	NA
a102537;12	352	11	17	25	0.108203	0.140888	0.69269	0.0360316	0.0571078	0.932548	NA
a102548;14	1065	59	14	128	8.67159e-08	3.52082e-07	-2.01063	4.63615e-05	0.000145368	0.86548	PREDICTED: scavenger receptor cysteine-rich domain-containing protein LOC284297 homolog [Ailuropoda melanoleuca]
a102549;19	418	51	22	31	0.000636113	0.00139697	-1.14833	0.00135636	0.00312594	-0.970106	NA
a102550;13	305	22	12	17	0.0587516	0.0828313	-0.80981	0.0893318	0.124402	-0.623846	NA
a102554;16	572	79	8	37	1.13536e-15	1.03675e-14	-3.23912	5.8269e-07	2.45323e-06	-1.3462	phosphonoformate immuno-associated protein 5-like [Bos taurus]
a102559;13	304	16	17	15	0.381061	0.4033	0.152122	0.250235	0.293188	-0.344986	NA
a102562;13	492	22	28	42	0.158561	0.195337	0.412583	0.0360221	0.0571094	0.681009	NA
a102568;13	675	25	43	47	0.00907215	0.0157294	0.847068	0.0320506	0.0515441	0.658856	NA
a102571;13	545	66	9	18	7.85226e-12	4.78313e-11	-2.80981	4.00598e-10	2.41846e-09	-2.12635	NA
a102572;14	910	120	28	26	2.19407e-14	1.84566e-13	-2.03488	5.15657e-20	6.74336e-19	-2.45833	NA
a102575;14	357	35	10	28	0.000140581	0.000350448	-1.7427	0.0576043	0.0854716	-0.573805	PREDICTED: similar to T-box transcription factor TBX18 (T-box protein 18) [Canis familiaris]
a102576;11	692	32	26	44	0.271592	0.307332	-0.234901	0.273183	0.313865	0.207555	NA
a10257;94	2430	1113	865	1153	2.25412e-06	7.60425e-06	-0.299022	0.000460831	0.00117658	-0.200938	cleavage and polyadenylation specific factor 7, 59kDa [Bos taurus]
a102582;15	316	7	38	15	5.84766e-06	1.84705e-05	2.50523	0.103575	0.140958	0.847659	NA
a102586;12	542	13	8	60	0.168399	0.205916	-0.63578	4.04303e-07	1.73558e-06	1.95457	NA
a10258;87	3465	1147	1430	1647	1.13498e-11	6.75487e-11	0.382809	5.07479e-07	2.15607e-06	0.270098	centrosomal protein 110kDa [Bos taurus]
a102595;10	395	25	10	18	0.00821848	0.0143856	-1.25727	0.0508278	0.0768113	-0.725808	NA
a102598;12	628	65	9	22	1.35724e-11	7.99483e-11	-2.78778	2.06122e-08	1.0401e-07	-1.81481	PREDICTED: hypothetical protein LOC100477423 [Ailuropoda melanoleuca]
a10259;110	1766	699	739	1193	0.0284134	0.0436237	0.144941	0	0	0.519353	RecName: Full=Nicotinate phosphoribosyltransferase; Short=NAPRTase; AltName: Full=Nicotinate phosphoribosyltransferase domain-containing protein 1
a102601;11	681	28	14	54	0.0225448	0.0355115	-0.935341	0.0184717	0.0318326	0.695656	NA
a102604;11	400	2	19	31	0.00010017	0.000254805	3.31259	4.88487e-05	0.000151805	3.70232	ovarian cancer G-protein coupled receptor 1 [Bos taurus]
a10260;102	2069	1269	634	1062	3.6167e-43	7.62425e-42	-0.936478	9.28417e-18	1.09964e-16	-0.508785	ERBB receptor feedback inhibitor 1 [Bos taurus]
a102610;17	328	22	25	31	0.27813	0.313036	0.249084	0.279654	0.31862	0.242888	NA
a102611;11	750	32	39	40	0.154976	0.191293	0.350061	0.424815	0.443016	0.0700513	NA
a102619;13	538	53	29	12	0.00719615	0.0127677	-0.80528	1.61712e-09	9.19804e-09	-2.39483	peroxisomal bifunctional enzyme [Bos taurus]
a10261;139	1815	1278	1076	1269	0.00104121	0.00219551	-0.183551	2.298e-06	8.94399e-06	-0.262073	epoxide hydrolase 1 [Bos taurus]
a102621;13	875	28	63	59	4.71173e-05	0.000128075	1.23458	0.00574732	0.0113726	0.823411	NA
a102629;13	725	16	0	110	1.11195e-05	3.37891e-05	0/unlimited	4.68515e-09	2.5462e-08	2.52948	slit homolog 1 protein-like [Bos taurus]
a102630;11	534	16	29	29	0.0188506	0.0302825	0.92264	0.0906871	0.126011	0.606104	septin 4 [Bos taurus]
a102631;12	794	24	49	64	0.000894324	0.00191551	1.09441	0.000228323	0.000621989	1.16316	NA
a102633;20	430	27	34	52	0.143273	0.179465	0.397235	0.0206158	0.0350832	0.693675	NA
a102637;15	367	38	12	20	0.000182227	0.000443649	-1.59831	0.00123141	0.00286541	-1.17788	NA
a102642;15	401	34	21	22	0.0576443	0.0815981	-0.630486	0.0121268	0.0219698	-0.879908	NA
a102647;14	305	14	22	26	0.0729677	0.099913	0.716736	0.0922405	0.127547	0.641208	NA
a102654;10	1042	48	38	56	0.194092	0.231999	-0.272376	0.454355	0.465865	-0.0294843	PREDICTED: hCG1645834-like [Oryctolagus cuniculus]
a10265;119	3034	1799	1679	1697	0.237907	0.275174	-0.0349337	2.89102e-12	2.19442e-11	-0.336085	PREDICTED: dnaJ homolog subfamily B member 12 [Callithrix jacchus]
a102662;13	536	30	27	37	0.412123	0.430429	-0.0873438	0.449196	0.461533	0.050686	PREDICTED: protein bicaudal D homolog 1-like [Ailuropoda melanoleuca]
a102667;14	336	14	10	34	0.24636	0.283276	-0.420768	0.0109803	0.0200707	1.02823	NA
a102681;12	608	21	15	68	0.197839	0.235995	-0.420768	9.84516e-06	3.47545e-05	1.44327	NA
a102684;11	684	30	19	55	0.0806393	0.109158	-0.594304	0.0281404	0.0460818	0.622592	PREDICTED: stAR-related lipid transfer protein 9-like [Ailuropoda melanoleuca]
a102687;10	777	33	32	38	0.47616	0.480346	0.0202651	0.439059	0.453747	-0.0483434	PREDICTED: copine-4-like [Pongo abelii]
a10268;84	2381	883	1007	916	6.49232e-05	0.000171051	0.254238	0.00173155	0.00390838	-0.198943	adapter protein CIKS [Bos taurus]
a102691;11	622	79	6	12	3.38035e-17	3.36582e-16	-3.65416	1.55538e-16	1.73709e-15	-2.97069	NA
a102693;11	1383	112	48	58	6.79111e-07	2.45594e-06	-1.15773	5.84135e-08	2.79849e-07	-1.20125	NA
a102707;12	535	10	30	45	0.000441705	0.000997961	1.64962	1.25609e-05	4.36142e-05	1.91805	NA
a102715;20	336	10	34	44	6.97285e-05	0.00018299	1.83019	1.89415e-05	6.37566e-05	1.88563	NA
a102718;16	315	13	18	36	0.156053	0.192438	0.534145	0.00343926	0.00720029	1.21761	NA
a102720;11	621	30	1	65	1.49457e-08	6.59038e-08	-4.84223	0.00284068	0.00609016	0.8636	NA
a102722;15	594	30	52	37	0.00426343	0.0079624	0.858208	0.449196	0.461533	0.050686	NA
a10272;70	3766	1550	958	1211	2.73002e-27	3.97549e-26	-0.629511	1.19961e-28	2.04876e-27	-0.607946	NA
a102735;15	503	16	59	15	9.79925e-08	3.9514e-07	1.9473	0.250235	0.293188	-0.344986	semaphorin 6B-like [Bos taurus]
a102736;14	529	16	30	38	0.0136478	0.0226727	0.97155	0.0090234	0.0169365	0.996051	NA
a102739;10	598	54	24	4	0.000647346	0.00141992	-1.10527	7.81271e-15	8.02142e-14	-4.00676	OTU domain containing 7A [Bos taurus]
a102744;11	644	37	22	27	0.0383045	0.0568892	-0.685363	0.0257897	0.0425923	-0.706443	NA
a102747;10	832	32	45	36	0.0472689	0.0684106	0.556512	0.402958	0.425581	-0.0819517	UDP-N-acetyl-alpha-D-galactosamine:polypeptide N-acetylgalactosaminyltransferase 8 (GalNAc-T8) [Bos taurus]
a10274;85	2000	650	1045	718	0	0	0.749651	0.0824955	0.116147	-0.108333	ankyrin repeat domain 47 [Bos taurus]
a102752;13	423	29	6	44	5.96441e-05	0.000159001	-2.20836	0.15903	0.200767	0.349574	NA
a102753;13	596	4	25	52	4.29661e-05	0.000117454	2.70852	1.58698e-05	5.41992e-05	3.44856	NA
a10275;104	5470	2133	2326	3543	5.75124e-06	1.81969e-05	0.189626	0	0	0.480211	PREDICTED: DOT1-like, histone H3 methyltransferase (S. cerevisiae) [Equus caballus]
a102761;18	338	22	22	20	0.439926	0.454003	0.0646592	0.189449	0.23368	-0.38938	NA
a102774;12	386	11	2	44	0.00812184	0.0142546	-2.39477	4.48823e-05	0.000141239	1.74812	NA
a102775;16	549	28	26	70	0.459228	0.46867	-0.042256	0.000300222	0.000798933	1.07005	PREDICTED: LOW QUALITY PROTEIN: BEN domain-containing protein 3-like [Sus scrofa]
a102776;13	449	22	14	40	0.118871	0.152924	-0.587417	0.0557369	0.0832503	0.61062	NA
a10277;142	1205	753	678	917	0.128306	0.16334	-0.0867053	0.325007	0.359826	0.0323951	dual specificity mitogen-activated protein kinase kinase 1 [Sus scrofa]
a102786;12	912	53	30	72	0.010212	0.0174719	-0.756371	0.236844	0.280317	0.190128	PREDICTED: hypothetical protein [Bos taurus]
a10278;65	4018	1038	1251	1423	1.6385e-08	7.19534e-08	0.333935	0.000270469	0.000727381	0.203252	zinc finger protein 740 [Bos taurus]
a102790;14	306	28	15	12	0.0342033	0.0514044	-0.835805	0.00102403	0.00242958	-1.47427	NA
a102794;14	472	36	14	37	0.00149683	0.00306824	-1.29791	0.262129	0.303934	-0.212348	NA
a102796;9	498	8	33	14	2.1902e-05	6.31698e-05	2.10905	0.202236	0.245118	0.555478	NA
a102797;16	572	102	9	12	9.28724e-21	1.07816e-19	-3.43784	3.76213e-23	5.44456e-22	-3.33934	NA
a102798;12	1010	83	18	60	4.88487e-11	2.73212e-10	-2.14046	0.00150207	0.00342599	-0.720026	UDP-N-acetylglucosamine/UDP-glucose/GDP-mannose transporter [Bos taurus]
a10280;76	2649	1298	659	892	2.24466e-42	4.66384e-41	-0.913281	1.11384e-37	2.30162e-36	-0.793052	Transmembrane protease, serine 11E2-like [Bos taurus]
a102811;12	323	13	10	24	0.308483	0.341052	-0.313852	0.104422	0.14191	0.632646	NA
a102818;11	305	5	14	25	0.0162167	0.0264505	1.55009	0.000564119	0.00141909	2.07005	NA
a102819;10	428	16	15	28	0.48063	0.483698	-0.0284502	0.112675	0.151231	0.555478	NA
a102823;13	470	38	21	26	0.0209959	0.0333159	-0.790951	0.014056	0.025055	-0.799365	NA
a102825;17	495	28	50	30	0.00359906	0.00681898	0.901161	0.339919	0.373136	-0.152341	NA
a102832;14	764	41	47	59	0.198337	0.236466	0.261696	0.179071	0.223015	0.273214	endophilin-A1 [Bos taurus]
a102833;13	527	11	42	55	3.89276e-06	1.26772e-05	1.99755	6.03335e-07	2.5358e-06	2.07005	NA
a102835;14	378	38	6	20	5.65359e-07	2.06348e-06	-2.59831	0.00123141	0.00286541	-1.17788	NA
a102839;13	362	30	5	27	1.1548e-05	3.4983e-05	-2.5203	0.144393	0.185969	-0.40388	MHD domain-containing death-inducing protein [Bos taurus]
a10283;145	1156	946	463	931	2.50802e-34	4.41063e-33	-0.966169	1.83459e-05	6.18642e-05	-0.274936	chromobox protein homolog 1 [Homo sapiens]
a102840;16	372	13	24	38	0.0267245	0.0413161	0.949182	0.00176771	0.00398076	1.29561	threonine aldolase 1-like [Bos taurus]
a102843;10	821	17	38	61	0.0013367	0.00275947	1.22512	7.2244e-06	2.60401e-05	1.5914	NA
a102845;13	639	74	10	25	3.92932e-13	2.86457e-12	-2.82287	2.2815e-09	1.277e-08	-1.81747	NA
a102848;12	399	8	25	25	0.000959966	0.00203499	1.70852	0.00665903	0.0129716	1.39198	NA
a102854;14	468	16	13	45	0.336167	0.365343	-0.234901	0.00104646	0.0024746	1.23998	NA
a10285;147	3483	1952	2073	3116	0.000435829	0.000985501	0.151426	0	0	0.422865	PREDICTED: plexin-B1-like [Sus scrofa]
a102861;13	418	24	24	23	0.437362	0.451841	0.0646592	0.22611	0.26963	-0.313277	PREDICTED: proprotein convertase subtilisin/kexin type 5 [Oryctolagus cuniculus]
a102866;19	366	17	26	53	0.0657842	0.0915079	0.677636	0.000130979	0.000375488	1.38858	NA
a10286;138	2497	1506	1555	1744	0.0167689	0.0272292	0.110852	0.21368	0.256935	-0.0401985	GPI transamidase component PIG-S [Bos taurus]
a102880;12	404	5	33	30	1.60403e-05	4.73464e-05	2.78713	6.49976e-05	0.000197486	2.33309	NA
a102886;13	442	20	8	31	0.0163649	0.0266551	-1.25727	0.184094	0.22814	0.380391	PREDICTED: beta-chimaerin-like [Ailuropoda melanoleuca]
a10289;123	3025	1249	1882	2161	1.25489e-12	8.54062e-12	0.656152	7.32192e-13	6.14346e-12	0.539049	HECT domain containing 3 [Bos taurus]
a1028;708	1170	2957	2227	3609	6.47755e-18	6.66871e-17	-0.344373	0.160269	0.202243	0.0355881	NA
a102905;13	405	23	28	20	0.196265	0.234405	0.348452	0.150663	0.192562	-0.453511	Integrin alpha-L precursor [Capra hircus]
a10291;73	3365	1097	1116	1259	0.0723797	0.0992171	0.0894327	0.185671	0.229475	-0.053162	vacuolar protein sorting 53 homolog [Bos taurus]
a102923;12	427	38	2	24	8.91e-10	4.43249e-09	-4.18327	0.00690353	0.0134085	-0.914842	NA
a102928;13	517	16	27	38	0.0349446	0.0523391	0.819547	0.0090234	0.0169365	0.996051	rhophilin, Rho GTPase binding protein 1 [Bos taurus]
a102931;11	357	3	0	42	0.0682924	0.094563	0/unlimited	2.78781e-05	9.11086e-05	3.55548	NA
a10293;126	952	478	468	721	0.357627	0.385192	0.0341572	2.77809e-05	9.09028e-05	0.341112	tRNA selenocysteine 1-associated protein 1 [Bos taurus]
a10294;87	1769	1166	351	609	7.19856e-95	2.48824e-93	-1.66737	5.46435e-65	1.58534e-63	-1.18893	PREDICTED: similar to capping protein (actin filament) muscle Z-line, alpha 2 [Monodelphis domestica]
a102950;13	947	55	36	73	0.0382362	0.0568015	-0.546775	0.275515	0.315147	0.156588	PREDICTED: shroom family member 4 [Bos taurus]
a102951;13	427	23	38	12	0.0183898	0.0296033	0.789025	0.00894995	0.0168189	-1.19048	NA
a102963;13	321	3	17	32	0.000564874	0.00125355	2.56716	2.92544e-05	9.50437e-05	3.16316	proline rich 14-like [Bos taurus]
a102965;17	658	64	38	53	0.00946246	0.0163166	-0.687413	0.0248661	0.0412626	-0.523956	NA
a102966;18	308	12	16	41	0.193993	0.231971	0.479697	0.000311692	0.000825609	1.52071	kappa B-ras 1 [Bos taurus]
a102968;12	773	69	31	25	0.000157849	0.000389649	-1.08967	2.70797e-08	1.34619e-07	-1.71655	NA
a102979;14	943	87	23	61	8.04287e-10	4.01902e-09	-1.85472	0.000688185	0.00169054	-0.764083	OX-2 membrane glycoprotein [Bos taurus]
a10297;186	1333	1136	891	1309	4.51761e-06	1.4584e-05	-0.285806	0.208496	0.251774	-0.0473745	translocase of inner mitochondrial membrane 50 homolog [Bos taurus]
a10298;75	1984	768	488	786	4.69129e-13	3.37671e-12	-0.589566	0.00142301	0.0032695	-0.218454	polybromo 1 isoform 2 [Bos taurus]
a102993;14	556	32	18	44	0.0351496	0.052594	-0.765416	0.273183	0.313865	0.207555	NA
a102995;13	442	19	20	37	0.381939	0.403404	0.13866	0.0403501	0.062885	0.709649	NA
a10299;140	1157	390	984	865	8.21565e-15	7.12458e-14	1.39984	2.82441e-13	2.50572e-12	0.897349	PREDICTED: transcription factor PU.1-like [Ailuropoda melanoleuca]
a1029;541	2176	7078	3293	4971	6.18719e-274	3.02993e-272	-1.03928	8.57511e-183	3.53053e-181	-0.761682	PREDICTED: astrocytic phosphoprotein PEA-15-like [Ailuropoda melanoleuca]
a103002;15	442	26	36	21	0.0750636	0.102573	0.534145	0.0920025	0.127274	-0.559999	zinc finger protein 862 [Bos taurus]
a103005;13	1192	89	50	86	0.00113552	0.00237535	-0.767218	0.0830046	0.116825	-0.301345	solute carrier family 15 member 2 [Sus scrofa]
a103007;11	764	38	18	52	0.00611569	0.0110318	-1.01334	0.261988	0.303814	0.200635	NA
a103010;13	744	25	34	66	0.0907009	0.121046	0.508266	0.000211626	0.000580058	1.14866	NA
a103014;12	478	31	25	22	0.26614	0.302158	-0.245681	0.0308121	0.0498035	-0.746641	NA
a103019;15	1084	31	98	90	1.87153e-10	9.91328e-10	1.72517	3.24475e-06	1.23499e-05	1.28578	NA
a10302;171	576	420	250	512	8.6858e-10	4.32687e-09	-0.683802	0.362126	0.39202	0.0338777	PREDICTED: myosin-10, partial [Sus scrofa]
a103032;15	387	19	28	25	0.0726676	0.0995645	0.624087	0.379423	0.406507	0.144052	NA
a103036;15	784	69	47	40	0.0362159	0.0540997	-0.489276	0.000110927	0.000321816	-1.03847	NA
a103037;17	349	12	21	39	0.0465141	0.0674604	0.872014	0.000648365	0.00161003	1.44856	NA
a10303;86	1296	546	430	628	0.00128227	0.00265363	-0.279905	0.275822	0.315469	-0.0500131	protein ARV1 [Bos taurus]
a103048;11	920	22	50	70	0.000227898	0.000546297	1.24908	9.5498e-06	3.37872e-05	1.41797	PREDICTED: collagen type VI alpha 6-like [Bos taurus]
a103054;11	705	12	44	48	3.35863e-06	1.10277e-05	1.93913	2.09757e-05	7.00564e-05	1.74812	NA
a103056;13	354	13	23	9	0.0369845	0.0551564	0.887781	0.10467	0.142141	-0.782391	NA
a103058;14	468	9	35	34	1.93056e-05	5.63614e-05	2.02402	0.000460637	0.00117624	1.66566	NA
a10305;109	1629	840	812	894	0.411973	0.430318	0.0157496	0.00972675	0.0180962	-0.161991	NA
a103064;12	725	15	30	74	0.00867302	0.0150864	1.06466	1.60121e-08	8.17549e-08	2.05069	NA
a103070;16	506	17	30	60	0.0206787	0.032846	0.884087	1.0503e-05	3.69242e-05	1.56755	NA
a103074;18	304	10	23	37	0.00860278	0.0149777	1.26629	0.000314943	0.000833412	1.63565	NA
a10307;216	1022	1117	838	1230	4.91883e-08	2.0562e-07	-0.349948	0.0291773	0.0474657	-0.112848	RecName: Full=NADH dehydrogenase [ubiquinone] iron-sulfur protein 3, mitochondrial; AltName: Full=Complex I-30kD; Short=CI-30kD; AltName: Full=NADH-ubiquinone oxidoreductase 30 kDa subunit; Flags: Precursor
a10308;148	517	189	478	270	1.05804e-13	8.35982e-13	1.40328	0.0273642	0.0449163	0.262696	prickle-like protein 3 [Bos taurus]
a103090;15	443	9	31	42	0.000127294	0.00031945	1.84893	1.76707e-05	5.97103e-05	1.97052	NA
a103098;11	647	44	24	30	0.0126534	0.0212496	-0.80981	0.00874267	0.016489	-0.804418	NA
a10309;136	1834	1022	1047	1376	0.0583105	0.08242	0.0995255	0.00144351	0.00330917	0.177209	tether containing UBX domain for GLUT4 [Bos taurus]
a103102;15	634	39	36	44	0.441239	0.455172	-0.050818	0.398897	0.422213	-0.0778474	PREDICTED: leukocyte immunoglobulin-like receptor, subfamily B, member 5 [Bos taurus]
a103105;14	506	25	42	34	0.0120826	0.0203873	0.81312	0.313532	0.350041	0.19173	PREDICTED: zinc finger protein 93-like [Bos taurus]
a10310;86	1391	617	460	629	2.50091e-05	7.15432e-05	-0.358977	0.00306055	0.00651759	-0.224087	RecName: Full=UPF0436 protein C9orf6 homolog
a103122;11	455	22	27	15	0.193348	0.231498	0.360115	0.046799	0.0716053	-0.804418	NA
a103123;16	399	26	17	52	0.113137	0.14668	-0.548318	0.0146028	0.0259515	0.748123	PREDICTED: similar to zinc finger protein 239 (predicted) isoform 4 [Canis familiaris]
a103125;13	418	9	27	35	0.000817353	0.00175978	1.64962	0.000310092	0.000822769	1.70748	NA
a103129;16	317	56	2	6	1.03983e-14	8.9557e-14	-4.7427	7.38705e-14	7.03786e-13	-3.47427	NA
a103131;14	616	53	21	39	0.000185933	0.000452078	-1.27094	0.0108363	0.0198655	-0.694395	PREDICTED: similar to predicted protein [Equus caballus]
a103134;13	678	52	20	53	0.000149268	0.000370271	-1.31385	0.210936	0.254227	-0.224396	PREDICTED: transmembrane and TPR repeat-containing protein 2-like [Pongo abelii]
a103135;10	308	34	4	14	3.34343e-07	1.2586e-06	-3.0228	0.00023178	0.000630776	-1.53198	NA
a103137;12	358	11	28	17	0.00208112	0.00413689	1.41258	0.260007	0.30198	0.376154	PREDICTED: similar to transcription factor YY1 [Strongylocentrotus purpuratus]
a10314;145	1392	1026	1153	694	8.26447e-05	0.00021453	0.233021	1.27445e-31	2.33925e-30	-0.8159	dual specificity protein phosphatase 26 [Bos taurus]
a103154;12	734	61	27	33	0.000293476	0.000686802	-1.11119	9.21242e-05	0.0002719	-1.13822	PREDICTED: hypothetical protein isoform 3 [Bos taurus]
a103156;15	486	43	25	33	0.0232308	0.0364099	-0.717749	0.0282211	0.0462016	-0.633747	NA
a103157;12	1326	67	61	81	0.392394	0.412685	-0.0706926	0.467339	0.475746	0.0218841	protein phosphatase 1, regulatory subunit 2-like [Bos taurus]
a10315;131	1450	706	868	986	3.27524e-07	1.23596e-06	0.362686	0.000591644	0.00147958	0.230043	E3 ubiquitin-protein ligase RNF25 [Bos taurus]
a103164;16	764	117	13	32	1.22399e-21	1.47244e-20	-3.10527	1.29735e-16	1.45753e-15	-2.12224	NA
a103167;14	808	98	14	36	2.01563e-16	1.91386e-15	-2.7427	6.19713e-11	4.04506e-10	-1.69666	NA
a10316;139	1578	867	795	1427	0.197097	0.235222	-0.0604179	0	0	0.467005	cytokine receptor-like factor 1 precursor [Homo sapiens]
a103170;11	724	46	24	42	0.00731249	0.0129575	-0.87394	0.105811	0.143275	-0.383121	sushi domain containing 1 [Bos taurus]
a103185;12	799	19	49	52	5.85961e-05	0.000156428	1.43144	0.000615687	0.00153634	1.20064	NA
a103188;15	311	20	22	21	0.325553	0.356839	0.202163	0.339207	0.372625	-0.181487	NA
a10318;113	3448	1760	1873	1908	0.00062876	0.00138224	0.154435	0.00226497	0.00495152	-0.135391	PREDICTED: ral guanine nucleotide dissociation stimulator-like [Bos taurus]
a103190;15	333	35	12	14	0.00061867	0.00136513	-1.47966	0.000145261	0.000412043	-1.5738	NA
a1031;974	8309	20045	68254	27136	0	0	1.83233	0	0	0.185089	fatty acid synthase [Capra hircus]
a103214;13	761	56	16	75	1.90797e-06	6.49225e-06	-1.7427	0.25651	0.298801	0.169587	NA
a103233;11	610	19	41	31	0.00126936	0.00262929	1.17428	0.143828	0.185514	0.454392	NA
a103239;13	319	7	11	9	0.154968	0.191353	0.716736	0.452744	0.46447	0.110693	NA
a10323;133	2089	914	1182	1789	2.58138e-12	1.66394e-11	0.435623	0	0	0.717011	PREDICTED: similar to RNA-specific adenosine deaminase B1 isoform DRADA2a [Canis familiaris]
a103241;14	630	79	7	36	2.0822e-16	1.9742e-15	-3.43177	3.33704e-07	1.4529e-06	-1.38573	NA
a103243;11	477	20	15	36	0.242735	0.28	-0.350378	0.0701672	0.101144	0.59612	NA
a103256;16	553	52	30	37	0.0130957	0.0218839	-0.72889	0.00792529	0.0151007	-0.742863	NA
a10325;166	978	742	616	872	0.00473409	0.00874399	-0.20383	0.395121	0.418699	-0.0189678	RecName: Full=Cyclic AMP-responsive element-binding protein 3; Short=CREB-3; Short=cAMP-responsive element-binding protein 3; AltName: Full=Luman; Contains: RecName: Full=Processed cyclic AMP-responsive element-binding protein 3
a103264;11	322	16	7	22	0.0406457	0.059736	-1.12799	0.339471	0.372765	0.207555	NA
a103265;9	626	32	13	27	0.00359434	0.00681122	-1.2349	0.092828	0.128037	-0.496989	NA
a103277;17	308	19	19	22	0.443998	0.457389	0.0646592	0.457767	0.468581	-0.0403726	NA
a103278;14	480	10	45	44	1.27655e-06	4.45656e-06	2.23458	1.89415e-05	6.37566e-05	1.88563	NA
a103281;12	336	0	33	15	2.6939e-11	1.53877e-10	0/unlimited	5.80307e-05	0.000177886	0/unlimited	NA
a10328;75	1244	498	310	510	9.56594e-10	4.74175e-09	-0.619218	0.008338	0.0157882	-0.217525	NA
a103292;14	725	42	50	39	0.147804	0.184384	0.316198	0.130612	0.171294	-0.358792	synapsin II [Bos taurus]
a103294;13	1196	88	47	84	0.000516463	0.0011541	-0.840184	0.0730806	0.104661	-0.318991	fibroblast growth factor 11 variant [Homo sapiens]
a10329;161	1942	953	1625	1831	0	0	0.834551	3.09086e-13	2.72856e-12	0.690207	interferon-related developmental regulator 2 [Bos taurus]
a103310;12	387	11	15	31	0.187797	0.226325	0.512118	0.00553084	0.0109932	1.24289	NA
a103313;8	384	19	10	12	0.0632258	0.0883532	-0.86134	0.0413503	0.0642166	-0.914842	NA
a103319;14	682	31	41	59	0.086481	0.116004	0.468015	0.0165655	0.0288825	0.67657	endoplasmic reticulum aminopeptidase 1 [Bos taurus]
a10331;110	421	151	110	233	0.0148082	0.024377	-0.392386	0.00637617	0.0124745	0.373905	NA
a103320;11	669	28	54	16	0.00104107	0.0021954	1.01219	0.00860112	0.0162513	-1.05923	NA
a103324;11	714	13	36	58	0.000264841	0.000626521	1.53414	8.84385e-07	3.6366e-06	1.90566	NA
a10333;146	1238	723	782	990	0.00842087	0.0147152	0.177832	0.00210982	0.00465858	0.201556	EH domain-binding protein 1-like protein 1 [Bos taurus]
a103340;17	713	49	65	44	0.0414741	0.0608415	0.472317	0.0863535	0.120925	-0.407155	NA
a103357;16	431	11	38	33	2.39952e-05	6.87348e-05	1.85316	0.00279729	0.00600578	1.33309	NA
a10335;97	1980	1258	463	832	1.21414e-77	3.79365e-76	-1.37739	7.7389e-41	1.70687e-39	-0.848353	elongation factor, RNA polymerase II, 2 [Bos taurus]
a103360;13	394	29	18	28	0.0754144	0.103029	-0.623397	0.212307	0.255531	-0.302503	NA
a103361;14	402	39	20	19	0.0107846	0.0183959	-0.898815	0.000493971	0.00125458	-1.28935	NA
a103376;14	634	43	41	32	0.496194	0.496862	-0.00405351	0.0214289	0.0363285	-0.678142	PREDICTED: hypothetical protein LOC100514885 [Sus scrofa]
a103377;16	763	103	18	40	2.27998e-15	2.04395e-14	-2.45192	9.36689e-11	6.00395e-10	-1.61645	NA
a103378;12	338	4	2	45	0.245325	0.282519	-0.935341	1.5877e-05	5.41955e-05	3.23998	myosin-2 [Bos taurus]
a10337;191	1089	639	1199	1066	1.9873e-13	1.51937e-12	0.972603	4.85445e-12	3.58666e-11	0.486443	cyclin-dependent kinase 5 [Mus musculus]
a103383;15	379	25	33	21	0.112329	0.145698	0.465197	0.118202	0.157061	-0.503416	NA
a103384;12	397	28	3	27	2.28098e-06	7.68852e-06	-3.15773	0.214982	0.258159	-0.304344	NA
a103386;9	439	23	23	15	0.43863	0.452813	0.0646592	0.0336308	0.0538062	-0.868548	NA
a10338;109	2042	1338	722	965	4.70586e-37	8.83572e-36	-0.825348	2.5112e-33	4.79569e-32	-0.723354	RecName: Full=Palmitoyltransferase ZDHHC9; AltName: Full=Zinc finger DHHC domain-containing protein 9; Short=DHHC-9
a103390;10	547	32	30	14	0.470857	0.476768	-0.0284502	0.000577257	0.00144662	-1.44452	ras-related and estrogen-regulated growth inhibitor-like protein [Bos taurus]
a103392;17	359	20	30	26	0.0590484	0.0831829	0.649622	0.391707	0.416646	0.126635	NA
a10339;143	867	924	232	533	5.33567e-92	1.81746e-90	-1.92911	1.51817e-42	3.43006e-41	-1.04563	unnamed protein product [Mus musculus]
a1033;1988	1414	13184	8857	16208	1.75133e-148	7.37119e-147	-0.509239	0.00324632	0.00685347	0.0460412	unnamed protein product [Mus musculus]
a103408;17	449	34	26	35	0.19797	0.236077	-0.322364	0.269927	0.311253	-0.210057	NA
a103416;14	431	46	20	15	0.00121139	0.00252048	-1.13697	1.30962e-06	5.27175e-06	-1.86855	NA
a10341;50	2271	746	290	553	5.35515e-43	1.12504e-41	-1.29846	8.99816e-18	1.06756e-16	-0.683773	myotubularin-related protein 2 [Bos taurus]
a103428;10	340	15	13	14	0.401772	0.421366	-0.141792	0.253359	0.296068	-0.351412	NA
a103429;12	367	10	39	14	6.94385e-06	2.17761e-05	2.02813	0.359524	0.389624	0.23355	NA
a10342;80	1625	645	569	635	0.0807548	0.109298	-0.116211	0.000333847	0.000876284	-0.274419	transducin-like enhancer protein 1 variant [Homo sapiens]
a103433;12	484	19	36	16	0.00707484	0.0125888	0.986657	0.152404	0.193957	-0.499804	NA
a103435;16	389	28	24	31	0.350115	0.378138	-0.157733	0.385389	0.411378	-0.105035	nephrocystin-1 [Bos taurus]
a103442;14	435	34	9	36	9.52143e-05	0.00024358	-1.85288	0.308399	0.345433	-0.169415	NA
a103444;15	691	39	29	53	0.154326	0.190829	-0.362762	0.27023	0.311558	0.190641	TBC1 domain family member 12-like [Bos taurus]
a103446;13	440	25	12	28	0.0234152	0.036665	-0.994234	0.406748	0.428943	-0.088378	AF4/FMR2 family, member 3 [Bos taurus]
a103447;13	482	70	0	7	2.04227e-21	2.4398e-20	0/unlimited	2.64747e-17	3.06984e-16	-3.5738	NA
a103451;10	347	14	21	16	0.0963609	0.12772	0.649622	0.447911	0.460584	-0.0592317	NA
a103459;13	728	36	31	58	0.337061	0.366156	-0.151069	0.078074	0.110685	0.436179	NA
a10345;55	1428	455	239	403	8.273e-15	7.17305e-14	-0.864197	7.37053e-06	2.64929e-05	-0.426963	NA
a103461;11	424	20	15	25	0.242735	0.28	-0.350378	0.443265	0.457387	0.0700513	NA
a103473;11	625	29	32	30	0.288529	0.323041	0.206678	0.291313	0.329861	-0.202967	ATP-binding cassette transporter 13-like [Bos taurus]
a10347;107	4496	2560	1735	2430	3.12044e-29	4.82739e-28	-0.496549	5.99892e-16	6.49879e-15	-0.327064	SEC14-like protein 1 [Bos taurus]
a103482;20	331	19	36	24	0.00707484	0.0125888	0.986657	0.431626	0.448377	0.0851582	Werner helicase interacting protein 1 [Bos taurus]
a103487;15	303	12	25	24	0.0118131	0.020003	1.12355	0.0724518	0.103949	0.748123	NA
a10348;106	3194	1179	2331	1203	3.64542e-12	2.29839e-11	1.04804	8.25766e-05	0.000246355	-0.222804	retinol saturase [Bos taurus]
a103494;14	768	92	16	43	6.08981e-14	4.93067e-13	-2.4589	7.30928e-08	3.46408e-07	-1.34917	PREDICTED: HEAT repeat-containing protein 1 [Sus scrofa]
a10349;74	3155	877	1196	1275	0	0	0.512228	2.43121e-06	9.44001e-06	0.287972	PREDICTED: peroxisome assembly protein 26-like [Sus scrofa]
a1034;1085	1943	10488	8526	10360	3.41675e-29	5.27582e-28	-0.234139	9.75697e-42	2.17344e-40	-0.269592	PREDICTED: 14-3-3 protein theta-like [Mus musculus]
a103501;19	306	22	26	28	0.233202	0.270889	0.305667	0.414922	0.434911	0.0960466	NA
a103504;12	525	27	8	49	0.00093988	0.00199542	-1.69023	0.0391371	0.0612228	0.607946	NA
a103508;10	1686	108	126	4	0.064494	0.0899207	0.287052	4.34858e-32	8.04799e-31	-5.00676	RecName: Full=Adiponectin; AltName: Full=30 kDa adipocyte complement-related protein; AltName: Full=Adipocyte complement-related 30 kDa protein; Short=ACRP30; AltName: Full=Adipocyte, C1q and collagen domain-containing protein; AltName: Full=Adipose most abundant gene transcript 1 protein; Short=apM-1; Flags: Precursor
a103512;14	849	12	87	58	3.13229e-07	1.18649e-06	2.92264	4.06321e-07	1.74341e-06	2.02114	NA
a10351;81	3226	1463	924	1324	8.66581e-24	1.12784e-22	-0.598306	2.23648e-13	2.0123e-12	-0.395903	PREDICTED: hypothetical protein isoform 2 [Bos taurus]
a103521;16	357	17	11	40	0.160216	0.196961	-0.563372	0.00817157	0.0155248	0.982589	NA
a103524;14	340	6	30	14	2.07908e-05	6.04709e-05	2.38659	0.0866343	0.121182	0.970516	NA
a103525;12	553	16	24	51	0.0815513	0.110334	0.649622	0.000136017	0.000388096	1.42055	NA
a103529;17	446	19	33	42	0.0181129	0.0291824	0.861126	0.0115296	0.0209916	0.892513	NA
a103531;13	648	34	55	23	0.00746607	0.0131977	0.758556	0.0173095	0.0300475	-0.815778	NA
a103539;12	637	9	39	60	4.03924e-06	1.31134e-05	2.18014	6.46182e-07	2.70374e-06	2.48509	NA
a10353;81	2922	991	1002	1324	0.106183	0.138574	0.0805848	0.00303338	0.00646253	0.166069	PREDICTED: similar to DNA-directed RNA polymerase III 47 kDa polypeptide (RNA polymerase C subunit 4) (RPC4) (RPC53) (BN51 protein) [Canis familiaris]
a103546;11	358	14	4	24	0.0123859	0.02084	-1.7427	0.144032	0.18566	0.525731	NA
a103548;15	475	8	12	58	0.16467	0.201931	0.649622	1.2624e-06	5.08981e-06	2.6061	NA
a10354;93	3230	1399	1314	1480	0.321195	0.35287	-0.0257714	0.000758406	0.00185109	-0.170676	histone acetyltransferase KAT2B [Homo sapiens]
a103557;8	369	24	2	2	4.71227e-06	1.51527e-05	-3.5203	3.37993e-07	1.46689e-06	-3.83684	NA
a103558;13	446	34	4	36	3.34343e-07	1.2586e-06	-3.0228	0.308399	0.345433	-0.169415	NA
a103560;13	749	49	45	45	0.424203	0.44102	-0.0581975	0.103338	0.140721	-0.374733	NA
a103562;12	412	21	6	34	0.00267982	0.00521297	-1.7427	0.137687	0.179031	0.443269	NA
a10356;123	2076	1190	946	1425	1.07304e-05	3.27079e-05	-0.26639	0.443899	0.457949	0.0081236	PREDICTED: sestrin-3-like [Ailuropoda melanoleuca]
a103578;11	830	38	17	69	0.0037905	0.00715286	-1.09581	0.0178092	0.0308266	0.60872	NA
a10357;152	461	298	308	261	0.168993	0.206462	0.112277	0.000142	0.000404029	-0.443139	NA
a103585;13	746	34	37	54	0.293229	0.327579	0.18665	0.0956801	0.131362	0.415548	NA
a103596;13	733	80	14	29	2.74242e-12	1.75943e-11	-2.44991	2.36804e-09	1.32264e-08	-1.71582	LMBR1 domain containing 2 [Bos taurus]
a10359;201	760	602	581	917	0.436088	0.451037	0.0134339	1.15488e-06	4.67607e-06	0.355281	RecName: Full=Nuclear receptor-binding protein 2
a103600;9	481	25	7	18	0.00101517	0.00214525	-1.77184	0.0508278	0.0768113	-0.725808	NA
a103602;17	323	28	16	24	0.0498744	0.0715563	-0.742696	0.117619	0.156751	-0.474269	cyclic AMP-regulated phosphoprotein, 21-like [Bos taurus]
a10360;80	2333	912	767	953	0.00437357	0.00815508	-0.185148	0.00240807	0.00524149	-0.188434	SDPR protein [Bos taurus]
a103610;14	515	60	10	21	7.21396e-10	3.61807e-09	-2.5203	1.16986e-07	5.41346e-07	-1.76645	NA
a103629;14	649	20	55	33	9.36568e-06	2.87839e-05	1.52409	0.128154	0.168482	0.470589	leukocyte immunoglobulin-like receptor, subfamily B, member 5-like [Bos taurus]
a103630;13	309	29	3	18	1.27822e-06	4.46081e-06	-3.20836	0.0139808	0.0249427	-0.939933	PREDICTED: hypothetical protein [Bos taurus]
a103636;17	688	108	15	42	3.47838e-18	3.63474e-17	-2.78334	3.53556e-11	2.37662e-10	-1.61445	PREDICTED: similar to Pro-Pol [Equus caballus]
a103639;17	414	15	22	53	0.101173	0.133132	0.6172	3.2374e-05	0.000104265	1.56915	NA
a103640;17	311	4	26	35	3.50566e-05	9.76638e-05	2.7651	1.72009e-05	5.8209e-05	2.87741	NA
a103651;12	357	20	12	19	0.102604	0.134527	-0.672306	0.237905	0.281437	-0.325877	NA
a10365;191	316	285	165	326	9.40716e-08	3.80736e-07	-0.723837	0.308727	0.345745	-0.0579667	NA
a103664;13	333	14	24	24	0.0403367	0.0593342	0.842267	0.144032	0.18566	0.525731	PREDICTED: similar to MAM domain containing glycosylphosphatidylinositol anchor 1 [Canis familiaris]
a103669;15	474	9	23	68	0.00470009	0.00868315	1.4183	6.41529e-07	2.68576e-06	2.66566	NA
a10366;100	4280	2167	1624	2273	4.47086e-14	3.66917e-13	-0.351488	1.21058e-05	4.21054e-05	-0.182978	PREDICTED: hypothetical protein [Bos taurus]
a103670;12	591	22	10	58	0.023894	0.0373041	-1.07284	0.000491583	0.00124899	1.14667	NA
a103672;16	356	11	27	36	0.00313554	0.0059964	1.36012	0.000961839	0.00229706	1.45862	NA
a103676;13	442	30	30	10	0.430252	0.445813	0.0646592	9.32322e-05	0.0002747	-1.83684	NA
a10367;143	1160	1002	522	886	4.71898e-31	7.6321e-30	-0.876102	5.15623e-11	3.39814e-10	-0.429381	NA
a103681;9	598	51	4	28	1.59689e-11	9.33207e-11	-3.60777	0.000381544	0.000990967	-1.11695	RecName: Full=UPF0547 protein C16orf87 homolog
a103687;13	527	12	41	56	1.32331e-05	3.97434e-05	1.83725	8.47481e-07	3.49524e-06	1.97052	NA
a10368;93	1023	775	173	352	2.74629e-86	9.09591e-85	-2.09877	1.60181e-55	4.31111e-54	-1.3905	NA
a103690;12	603	13	39	39	7.12281e-05	0.000186661	1.64962	0.00125675	0.00292001	1.33309	NA
a1036;236	4758	5791	4602	5348	2.90072e-21	3.44315e-20	-0.266892	2.74793e-41	6.09633e-40	-0.36669	ATPase, Ca++ transporting, cardiac muscle, slow twitch 2 isoform 2 [Bos taurus]
a103702;13	446	19	25	28	0.148008	0.184596	0.460588	0.243345	0.286823	0.307551	hypothetical protein [Macaca fascicularis]
a103704;13	550	39	36	27	0.441239	0.455172	-0.050818	0.0144854	0.0257666	-0.782391	PREDICTED: Acp1 protein-like [Bos taurus]
a103708;7	373	14	6	12	0.0486845	0.0701216	-1.15773	0.200066	0.243616	-0.474269	NA
a103711;12	304	4	10	14	0.0496641	0.0713181	1.38659	0.0246112	0.0409337	1.55548	NA
a103722;13	411	8	22	31	0.00371893	0.00703293	1.52409	0.000673196	0.00166178	1.70232	NA
a10373;147	2265	1422	1548	1771	0.000205175	0.00049464	0.187143	0.103935	0.141356	0.064766	HGFL protein [Bos taurus]
a103740;11	674	51	17	20	3.21837e-05	9.01305e-05	-1.5203	4.44352e-06	1.65716e-05	-1.60237	NA
a103745;11	505	57	4	16	4.29275e-13	3.11519e-12	-3.76823	8.83999e-09	4.65508e-08	-2.08477	testis expressed 10 [Bos taurus]
a103748;10	1061	34	69	51	0.00011215	0.000283692	1.08572	0.151544	0.193301	0.333086	NA
a103753;13	356	16	18	24	0.318887	0.350797	0.234584	0.244688	0.287626	0.333086	NA
a103756;16	362	13	21	47	0.0683958	0.0946408	0.756537	6.88608e-05	0.00020845	1.60227	NA
a103758;15	314	37	8	18	9.05079e-06	2.7949e-05	-2.14479	0.000660531	0.00163417	-1.29141	NA
a10375;104	1418	818	551	684	7.29103e-11	4.01166e-10	-0.505389	3.9284e-12	2.93245e-11	-0.509981	PREDICTED: NCK adaptor protein 1 [Oryctolagus cuniculus]
a103768;13	1168	85	61	59	0.0435104	0.0635724	-0.413994	0.000653097	0.00161973	-0.778625	MAX gene associated isoform 1 [Bos taurus]
a103773;16	473	38	24	38	0.0557988	0.0791511	-0.598306	0.221242	0.264612	-0.251877	NA
a103775;12	613	35	38	27	0.29398	0.328269	0.183304	0.0443032	0.0683648	-0.626272	ubinuclein-2 [Bos taurus]
a10377;98	2142	1283	723	951	2.41975e-31	3.94337e-30	-0.762794	3.31155e-29	5.72332e-28	-0.683881	M-phase phosphoprotein 8 [Bos taurus]
a103782;14	382	0	11	48	0.000186014	0.00045204	0/unlimited	1.05804e-13	9.92055e-13	0/unlimited	NA
a103783;13	508	16	14	50	0.408033	0.426638	-0.127986	0.000193198	0.000535012	1.39198	MEF2 activating motif and SAP domain containing transcriptional regulator isoform 1 [Bos taurus]
a103787;16	404	27	31	42	0.244152	0.281439	0.263968	0.14252	0.184267	0.385553	NA
a10378;32	1338	330	87	163	1.47431e-32	2.48167e-31	-1.85872	9.28192e-22	1.281e-20	-1.26947	NA
a103791;16	990	95	60	55	0.00564385	0.0102558	-0.598306	7.04921e-06	2.54665e-05	-1.04037	G protein-coupled receptor, family C, group 5, member A [Bos taurus]
a103792;13	553	33	17	34	0.0180293	0.0290668	-0.892272	0.273976	0.314342	-0.208808	NA
a10379;101	1349	892	521	467	5.12739e-20	5.77366e-19	-0.711101	5.50171e-50	1.39224e-48	-1.1855	NA
a103801;13	750	60	23	38	4.79473e-05	0.000130104	-1.31867	0.00101284	0.00240518	-0.91084	queuine tRNA-ribosyltransferase subunit QTRTD1 [Bos taurus]
a103804;12	692	39	39	42	0.420818	0.437909	0.0646592	0.322361	0.357449	-0.144962	PREDICTED: hypothetical protein [Bos taurus]
a103811;12	584	41	13	43	0.000109255	0.000276625	-1.59245	0.277672	0.316792	-0.183164	NA
a103829;16	341	16	15	21	0.48063	0.483698	-0.0284502	0.393431	0.417923	0.140441	NA
a10383;112	4845	2274	2146	3268	0.331656	0.362304	-0.0189229	0	0	0.271299	PREDICTED: ankyrin repeat and FYVE domain containing 1 [Bos taurus]
a103840;13	422	20	47	2	0.000233769	0.000559142	1.29732	5.67758e-06	2.07888e-05	-3.5738	cysteine-rich secretory protein 3 [Capra hircus]
a103844;15	657	74	16	41	4.91881e-10	2.50365e-09	-2.14479	2.90867e-05	9.45864e-05	-1.10378	PREDICTED: thyroid hormone receptor interactor 11 [Bos taurus]
a103846;13	632	5	70	40	1.54163e-05	4.58503e-05	3.87201	9.1559e-06	3.25012e-05	2.74812	NA
a10384;148	379	259	230	242	0.207775	0.245833	-0.106659	0.00331808	0.00697976	-0.349822	NA
a10386;144	558	263	422	345	1.19694e-11	7.09954e-11	0.746839	0.119192	0.158114	0.139657	DDB1- and CUL4-associated factor 11 [Bos taurus]
a103870;12	1086	46	63	72	0.0315815	0.0479134	0.518377	0.0745051	0.106314	0.394486	NA
a103875;11	394	28	6	15	9.79675e-05	0.000250219	-2.15773	0.00539281	0.0107495	-1.15234	NA
a10387;88	4646	2001	1495	2356	2.10032e-13	1.60167e-12	-0.355916	0.354814	0.385945	-0.0162584	poly(ADP-ribose) glycohydrolase [Bos taurus]
a103882;14	621	60	5	45	4.55545e-13	3.28592e-12	-3.5203	0.00918859	0.0172281	-0.666914	NA
a103890;14	889	9	93	52	1.7808e-06	6.0984e-06	3.43389	8.41846e-07	3.47288e-06	2.27864	G protein-coupled receptor 83 [Bos taurus]
a103892;12	585	25	25	35	0.43612	0.451037	0.0646592	0.274371	0.314722	0.23355	swine leucocyte antigen 2/2(SLA-2/2) [Sus scrofa]
a103903;12	468	13	14	44	0.379025	0.402437	0.171574	0.000211647	0.000579986	1.50712	NA
a103905;15	547	39	9	49	9.27393e-06	2.85573e-05	-2.05082	0.406592	0.42882	0.0774309	NA
a103908;13	793	36	32	77	0.384248	0.405332	-0.105266	0.00153878	0.00350427	0.844985	NA
a10390;88	756	108	427	407	0	0	2.04786	0	0	1.66212	NA
a103914;11	391	25	13	18	0.0364676	0.0544442	-0.878757	0.0508278	0.0768113	-0.725808	NA
a103927;17	357	8	21	35	0.00573983	0.0104081	1.45698	0.000131447	0.000376577	1.87741	NA
a103932;14	312	2	18	39	0.000134959	0.000337092	3.23458	4.84306e-05	0.000151108	4.03353	NA
a103938;15	307	14	23	22	0.0545729	0.077588	0.780866	0.21595	0.259144	0.4002	NA
a103939;13	450	24	37	11	0.0335184	0.0505103	0.68915	0.00337829	0.00709396	-1.37741	PREDICTED: similar to Zinc finger MYND domain-containing protein 17 [Equus caballus]
a103956;13	520	40	21	28	0.0121135	0.020431	-0.864951	0.0148943	0.0263898	-0.76645	PREDICTED: neurotrophin-3-like [Pongo abelii]
a10396;108	1819	701	842	1287	3.89553e-06	1.26842e-05	0.329065	4.67404e-13	4.03656e-12	0.624649	TNFAIP3 interacting protein 2-like [Bos taurus]
a10397;65	1967	1044	246	400	4.34826e-110	1.61069e-108	-2.02073	8.26909e-94	2.85627e-92	-1.63593	NA
a103987;13	568	56	10	21	5.74945e-09	2.6478e-08	-2.42077	8.25038e-07	3.40597e-06	-1.66691	NA
a103991;14	405	28	14	32	0.0225448	0.0355115	-0.935341	0.431729	0.448005	-0.0592317	NA
a103994;14	304	12	13	17	0.377963	0.401618	0.180136	0.332806	0.366861	0.250624	NA
a103996;11	673	48	25	34	0.00618968	0.0111538	-0.876447	0.00977008	0.0181624	-0.749376	NA
a103;8024	1550	67679	50601	55591	0	0	-0.354883	0	0	-0.535734	tumor protein, translationally-controlled 1 [Homo sapiens]
a104002;18	408	38	28	34	0.149471	0.186031	-0.375913	0.112036	0.15056	-0.412341	NA
a104009;12	818	26	37	61	0.059835	0.0841969	0.573673	0.00147712	0.00337952	0.978421	NA
a10400;86	4885	2634	1563	1705	2.47057e-52	5.98665e-51	-0.688278	2.46333e-88	8.31573e-87	-0.87936	myosin-Ib isoform 2 [Homo sapiens]
a104013;13	594	63	36	17	0.00636243	0.0114399	-0.742696	8.22136e-10	4.82313e-09	-2.14169	NA
a104017;13	798	75	37	38	0.000374667	0.000857664	-0.954706	4.89658e-06	1.80944e-05	-1.23277	unnamed protein product [Homo sapiens]
a104019;12	520	8	30	43	8.89658e-05	0.000229195	1.97155	5.24974e-06	1.92999e-05	2.17439	PREDICTED: similar to LINE-1 reverse transcriptase homolog [Canis familiaris]
a10401;81	2015	755	541	908	1.30027e-07	5.16094e-07	-0.416189	0.421171	0.439917	0.0143389	PREDICTED: transcription factor 7-like 2-like [Rattus norvegicus]
a104023;10	465	13	22	16	0.0505998	0.0725102	0.823651	0.47389	0.480136	0.0476835	NA
a10403;100	2504	946	981	1514	0.0374441	0.0557716	0.117072	0	0	0.426576	RecName: Full=Nuclear factor of activated T-cells, cytoplasmic 1; Short=NF-ATc1; Short=NFATc1; AltName: Full=NFAT transcription complex cytosolic component; Short=NF-ATc; Short=NFATc
a104043;16	324	37	11	18	0.000130515	0.000326948	-1.68536	0.000660531	0.00163417	-1.29141	NA
a104044;13	634	65	11	35	1.78824e-10	9.48079e-10	-2.49828	5.2343e-05	0.000161712	-1.14496	Dmx-like 1 [Bos taurus]
a104056;11	532	27	31	21	0.244152	0.281439	0.263968	0.0707418	0.101887	-0.614447	NA
a104057;10	618	40	14	30	0.000327511	0.000757966	-1.44991	0.0271432	0.0445975	-0.666914	NA
a104059;12	1122	34	79	75	3.30055e-06	1.08486e-05	1.28098	0.00114328	0.00268649	0.889479	matrilin 4-like [Bos taurus]
a104063;13	1111	109	16	71	7.85132e-18	8.05769e-17	-2.70353	3.08159e-05	9.97637e-05	-0.870314	NA
a10406;154	480	250	182	276	0.00248818	0.00487123	-0.39333	0.192181	0.236414	-0.109137	hypothetical protein [Leishmania infantum JPCM5]
a104072;17	698	39	48	68	0.121004	0.155132	0.36422	0.0284462	0.0465306	0.550184	KIAA1388 protein [Homo sapiens]
a104076;11	543	23	38	17	0.0183898	0.0296033	0.789025	0.0670198	0.0973007	-0.687976	PREDICTED: T-cell activation Rho GTPase-activating protein-like [Bos taurus]
a10407;132	2803	1622	1690	1900	0.00673104	0.0120254	0.123909	0.313231	0.349785	-0.0236512	low density lipoprotein receptor adapter protein 1 [Bos taurus]
a104081;10	1089	63	36	52	0.00636243	0.0114399	-0.742696	0.0248285	0.0412364	-0.528717	NA
a104085;15	399	42	13	20	7.20642e-05	0.000188485	-1.62722	0.00024417	0.000662147	-1.32227	protein tyrosine phosphatase, receptor type, B [Bos taurus]
a104094;16	522	42	37	38	0.360306	0.387318	-0.118205	0.109018	0.147171	-0.396267	NA
a104102;10	479	19	13	36	0.180018	0.218098	-0.482829	0.0508123	0.0768103	0.670121	NA
a104122;22	621	37	63	75	0.00237039	0.00466854	0.832486	0.00358313	0.00747695	0.767489	NA
a104126;19	325	13	20	43	0.0912807	0.121726	0.686148	0.000305103	0.000810977	1.47395	NA
a104135;12	400	20	28	18	0.0966692	0.128103	0.550086	0.192695	0.236952	-0.40388	NA
a104139;8	607	15	6	36	0.033292	0.0502662	-1.25727	0.00995781	0.0184747	1.01116	NA
a10413;134	3082	2278	1974	1593	0.000680547	0.00148328	-0.141987	3.6325e-61	1.02306e-59	-0.767898	PREDICTED: similar to Cegp1 protein isoform 6 [Canis familiaris]
a104141;10	494	27	22	26	0.292052	0.32642	-0.230797	0.2177	0.260973	-0.306325	NA
a104144;13	500	16	40	39	0.000347491	0.000799684	1.38659	0.00674675	0.0131255	1.03353	NA
a104147;14	903	109	12	35	2.39638e-20	2.73956e-19	-3.11856	1.2297e-13	1.14503e-12	-1.89078	PREDICTED: zinc finger protein 268-like [Ailuropoda melanoleuca]
a104148;11	1725	46	122	94	2.23926e-10	1.17785e-09	1.47183	0.00112234	0.00264424	0.77915	PREDICTED: p2X purinoceptor 5-like [Sus scrofa]
a104155;16	306	21	15	14	0.197839	0.235995	-0.420768	0.0451587	0.0693581	-0.836839	NA
a10415;102	3294	2322	944	1440	1.11195e-119	4.2636e-118	-1.23385	2.16596e-87	7.28682e-86	-0.941176	PREDICTED: similar to DNA topoisomerase I [Canis familiaris]
a104160;14	404	26	23	24	0.395703	0.415675	-0.112219	0.182524	0.226669	-0.367354	NA
a104161;16	340	23	20	24	0.38127	0.403339	-0.136975	0.321551	0.356716	-0.190476	NA
a10416;196	1105	538	992	1381	2.86215e-13	2.13312e-12	0.947393	9.99201e-16	1.06925e-14	1.10816	serine/arginine repetitive matrix 2, isoform CRA_c [Homo sapiens]
a104172;14	331	20	37	8	0.00785491	0.0138224	0.952185	0.00322909	0.00683192	-1.5738	NA
a104175;12	434	26	28	18	0.331337	0.362024	0.171574	0.0374451	0.0589884	-0.782391	PREDICTED: rod cGMP-specific 3',5'-cyclic phosphodiesterase subunit alpha-like [Ailuropoda melanoleuca]
a104183;15	1028	107	40	62	4.69981e-08	1.969e-07	-1.35488	2.06376e-06	8.07872e-06	-1.03915	NA
a104190;13	492	34	13	44	0.00172741	0.00348104	-1.32236	0.363439	0.39328	0.120092	NA
a10419;108	1201	523	435	846	0.015781	0.0258304	-0.201136	1.361e-08	7.01024e-08	0.44197	NA
a104203;15	849	26	50	93	0.0015854	0.00322778	1.00808	4.03833e-08	1.97054e-07	1.58684	NA
a10420;107	2325	1435	750	1319	3.07601e-43	6.4928e-42	-0.871429	5.59085e-12	4.10726e-11	-0.373483	CXXC-type zinc finger protein 5 [Bos taurus]
a104216;11	399	3	24	25	4.7531e-05	0.000129099	3.06466	7.97953e-05	0.000238994	2.80702	NA
a104217;9	361	8	5	23	0.237431	0.274785	-0.613413	0.0135293	0.024185	1.27169	NA
a10422;70	2996	904	794	1221	0.0403938	0.0593977	-0.122525	0.00200987	0.00446155	0.181792	kismet-like [Bos taurus]
a104238;13	429	35	6	25	2.764e-06	9.20983e-06	-2.47966	0.024713	0.0410592	-0.737304	NA
a10423;161	829	1171	241	394	2.55901e-138	1.04657e-136	-2.21598	4.45673e-122	1.67872e-120	-1.82335	NA
a104245;18	518	53	49	26	0.434106	0.449196	-0.0485514	6.60953e-05	0.000200703	-1.27936	PREDICTED: hypothetical protein [Bos taurus]
a104256;13	712	43	39	34	0.407498	0.426224	-0.0762033	0.0365819	0.0578093	-0.590679	NA
a104265;14	831	67	31	49	0.000295174	0.000690645	-1.04723	0.00451337	0.0091958	-0.703256	zinc finger protein 642 [Bos taurus]
a104269;13	376	10	48	4	1.06055e-06	3.73433e-06	2.32769	0.028639	0.0467984	-1.5738	long-chain specific acyl-CoA dehydrogenase, mitochondrial [Bos taurus]
a104289;13	453	18	17	34	0.487672	0.489696	-0.0178029	0.0570986	0.0849548	0.665661	NA
a104293;14	403	21	24	30	0.276113	0.311329	0.257304	0.267827	0.309314	0.262696	NA
a104299;10	385	5	10	31	0.0895512	0.119657	1.06466	4.38697e-05	0.000138323	2.38039	PREDICTED: hypothetical protein [Bos taurus]
a104307;12	493	47	10	22	5.27306e-07	1.93444e-06	-2.168	9.05383e-05	0.000267895	-1.34703	coiled-coil domain containing 39-like [Bos taurus]
a10430;110	2470	1562	907	1297	2.81457e-34	4.93912e-33	-0.719561	3.15791e-22	4.42919e-21	-0.520093	ubiquitin carboxyl-terminal hydrolase 14 [Bos taurus]
a104310;17	598	98	20	33	2.65199e-13	1.98719e-12	-2.22812	6.6393e-12	4.82696e-11	-1.82219	NA
a104323;17	375	31	16	24	0.0214501	0.0339636	-0.889537	0.0558381	0.0833305	-0.621111	methyltransferase-like protein 21B [Bos taurus]
a104324;13	539	20	8	62	0.0163649	0.0266551	-1.25727	4.10885e-05	0.000130122	1.38039	dihydropyrimidinase [Bos taurus]
a104326;13	595	45	31	35	0.0805379	0.109046	-0.472998	0.0288057	0.0469568	-0.614447	PREDICTED: similar to Roundabout homolog 2 [Equus caballus]
a10432;82	3894	1768	1218	1376	3.62348e-19	3.94193e-18	-0.472945	6.69262e-33	1.26531e-31	-0.613515	tyrosine-protein kinase BAZ1B [Bos taurus]
a104332;17	385	28	25	26	0.40426	0.423676	-0.0988395	0.178965	0.22296	-0.358792	NA
a104338;18	356	14	16	27	0.314168	0.346467	0.257304	0.0727734	0.10432	0.695656	transposase-like protein
a10433;95	898	820	153	202	5.67339e-105	2.05809e-103	-2.35743	1.70108e-114	6.2728e-113	-2.27315	NA
a104340;13	700	70	36	16	0.00102545	0.00216553	-0.894699	5.53476e-12	4.0694e-11	-2.38116	NA
a10434;111	1711	817	767	1043	0.358001	0.38557	-0.0264503	0.0682253	0.0988289	0.100454	phosphatidate cytidylyltransferase 2 [Bos taurus]
a104361;15	343	18	29	19	0.0402874	0.0593319	0.752715	0.352221	0.383647	-0.173874	NA
a10436;111	8195	5720	2462	4840	1.79534e-261	8.6966e-260	-1.15153	3.9658e-69	1.19066e-67	-0.492885	utrophin-like [Bos taurus]
a104372;13	1002	91	38	40	4.06434e-06	1.31801e-05	-1.19521	2.02634e-08	1.02313e-07	-1.43774	PREDICTED: similar to THO complex subunit 1 (Tho1) (Nuclear matrix protein p84) isoform 7 [Canis familiaris]
a104382;11	432	27	20	15	0.196384	0.234479	-0.3683	0.00794867	0.0151374	-1.09987	NA
a104392;13	508	20	42	22	0.0014689	0.00301231	1.13505	0.393325	0.417978	-0.114373	ubiquitin-associated and SH3 domain-containing protein A [Bos taurus]
a104395;13	505	32	35	24	0.291552	0.325909	0.193942	0.0426341	0.0660673	-0.666914	NA
a1043;1832	657	9031	1998	3974	0	0	-2.11167	0	0	-1.43617	Keratin 77-like [Bos taurus]
a10440;84	2829	1081	950	1344	0.0288997	0.04429	-0.121708	0.145718	0.187508	0.0622899	polycystin-2 [Bos taurus]
a104414;12	337	10	4	15	0.0702091	0.0965461	-1.25727	0.296966	0.334873	0.333086	NA
a104415;15	341	7	24	32	0.000692431	0.00150597	1.84227	0.000186268	0.000516957	1.94077	PREDICTED: class II transactivator isoform 1 [Bos taurus]
a10441;64	450	22	163	150	7.17786e-10	3.60585e-09	2.95396	6.11196e-11	3.99504e-10	2.51751	NA
a10442;91	2380	915	1012	1107	0.000702988	0.00152758	0.210025	0.361969	0.391863	0.0229348	anaphase-promoting complex subunit 7 [Bos taurus]
a104430;13	913	64	37	40	0.00691307	0.012334	-0.725887	0.00058878	0.00147294	-0.929949	PREDICTED: zinc finger protein 792-like [Bos taurus]
a104433;12	336	34	8	14	3.84417e-05	0.000106292	-2.0228	0.00023178	0.000630776	-1.53198	NA
a104443;12	320	13	25	24	0.0191017	0.0306488	1.00808	0.104422	0.14191	0.632646	NA
a104447;13	419	43	6	26	3.77811e-08	1.5975e-07	-2.77664	0.00280493	0.00601706	-0.977702	NA
a10444;116	1393	782	560	837	7.51696e-08	3.0694e-07	-0.417083	0.0160135	0.0281243	-0.153818	PREDICTED: similar to zinc finger CCCH-type containing 18 [Equus caballus]
a104451;17	328	2	27	47	6.03419e-05	0.000160032	3.81955	4.84257e-05	0.00015127	4.30271	NA
a10445;110	1243	808	373	712	1.08189e-33	1.86654e-32	-1.05052	2.23873e-09	1.25484e-08	-0.434355	NA
a104469;12	316	9	26	12	0.00128101	0.00265186	1.59517	0.410923	0.431516	0.163161	NA
a10446;66	2856	1284	590	763	6.96254e-53	1.69973e-51	-1.0572	1.4887e-54	3.96755e-53	-1.00277	PREDICTED: hypothetical protein [Bos taurus]
a10447;148	3277	1893	1904	2961	0.0594322	0.0836852	0.0730183	0	0	0.393533	mitogen-activated protein kinase kinase kinase 11 [Bos taurus]
a104483;13	394	15	2	52	0.000898598	0.00192114	-2.84223	4.6984e-05	0.000147188	1.54167	NA
a10448;40	474	44	30	51	0.0770189	0.104928	-0.487882	0.443525	0.457592	-0.038883	PAOX protein [Bos taurus]
a104495;13	327	5	17	27	0.00391037	0.00735406	1.83019	0.000234088	0.000636124	2.18108	NA
a104497;15	334	27	25	10	0.456032	0.46662	-0.0463721	0.000427278	0.00109834	-1.68484	NA
a1044;902	1207	4363	4515	6215	9.77757e-05	0.000249846	0.114065	1.52418e-11	1.05652e-10	0.258557	ATP synthase subunit b, mitochondrial precursor [Bos taurus]
a104501;12	839	45	33	46	0.12468	0.159306	-0.3828	0.231229	0.274671	-0.220168	NA
a104508;13	329	40	2	12	2.55776e-10	1.339e-09	-4.25727	2.50949e-06	9.71287e-06	-1.98884	NA
a10451;151	2265	1106	2195	1448	1.15841e-12	7.92131e-12	1.05353	0.00873247	0.0164723	0.136833	PREDICTED: LOW QUALITY PROTEIN: epidermis-type lipoxygenase 3-like [Macaca mulatta]
a104522;17	486	31	27	32	0.364132	0.390776	-0.13465	0.282405	0.321434	-0.206073	NA
a104538;11	610	66	13	6	1.06534e-09	5.26141e-09	-2.2793	7.17095e-17	8.15047e-16	-3.71131	NA
a104548;14	426	12	22	37	0.0335839	0.0505911	0.939128	0.00132193	0.003058	1.37261	NA
a104554;18	374	36	21	27	0.0353383	0.0528522	-0.712948	0.0339579	0.054273	-0.666914	amyotrophic lateral sclerosis 2 (juvenile) chromosome region, candidate 4 [Bos taurus]
a104559;15	493	42	26	39	0.0403465	0.0593326	-0.627218	0.130612	0.171294	-0.358792	MGC143399 protein [Bos taurus]
a10456;152	827	476	691	596	1.46105e-12	9.83606e-12	0.602383	0.207842	0.251052	0.072474	apoptosis-associated speck-like protein containing a CARD [Bos taurus]
a104591;13	311	8	4	35	0.151814	0.188255	-0.935341	0.000131447	0.000376577	1.87741	NA
a104594;17	526	54	21	42	0.000129981	0.00032586	-1.29791	0.0187626	0.0322914	-0.614447	NA
a10459;162	467	192	509	401	0	0	1.47122	2.54585e-11	1.73147e-10	0.810619	NA
a104603;15	326	45	2	12	1.10957e-11	6.61406e-11	-4.42719	1.61225e-07	7.33313e-07	-2.15877	NA
a104615;12	431	39	7	21	1.11835e-06	3.92716e-06	-2.41339	0.00135334	0.0031203	-1.14496	NA
a104619;17	378	32	9	39	0.000233462	0.000558571	-1.76542	0.466959	0.475488	0.0335255	NA
a104623;12	504	0	32	40	5.51127e-11	3.06225e-10	0/unlimited	1.39432e-11	9.69236e-11	0/unlimited	RecName: Full=Elongation factor 2; Short=EF-2
a104629;11	329	9	10	25	0.372926	0.397728	0.216662	0.0125517	0.0226776	1.22205	NA
a10463;109	1078	392	651	584	0	0	0.796463	0.000282983	0.000759	0.323238	U7 snRNA-associated Sm-like protein LSm10 [Bos taurus]
a104645;8	667	11	32	28	0.000374282	0.000857042	1.60523	0.0146145	0.0259657	1.09605	NA
a104646;14	373	11	37	29	3.82657e-05	0.000105859	1.81468	0.0106476	0.0195696	1.14667	NA
a104658;10	528	42	16	15	0.000539655	0.00120239	-1.32766	9.94055e-06	3.50522e-05	-1.7373	NA
a10465;111	7091	3597	3466	4047	0.372727	0.397689	0.0111367	0.00667181	0.0129913	-0.0818181	hypothetical protein BOS_18607 [Bos taurus]
a104665;17	522	27	16	71	0.0648587	0.0903689	-0.690228	0.000133956	0.000382805	1.14298	NA
a104666;11	555	31	34	27	0.290617	0.324953	0.197926	0.116393	0.155463	-0.451186	polymerase (DNA directed), epsilon [Bos taurus]
a10466;98	1899	752	728	1123	0.405616	0.424436	0.017865	6.74501e-07	2.81551e-06	0.326677	CUE domain-containing protein 1 [Bos taurus]
a104670;11	446	34	7	23	1.41318e-05	4.23105e-05	-2.21545	0.0173095	0.0300475	-0.815778	microtubule associated serine/threonine kinase 1 [Bos taurus]
a104675;13	350	27	14	21	0.0305004	0.0464526	-0.882873	0.0707418	0.101887	-0.614447	NA
a10467;61	2035	638	504	463	0.000661176	0.00144664	-0.275473	1.46319e-16	1.63636e-15	-0.714421	DNA-(apurinic or apyrimidinic site) lyase 2 [Bos taurus]
a104682;13	318	28	4	23	9.55101e-06	2.92993e-05	-2.7427	0.092612	0.127915	-0.53567	NA
a104688;12	418	18	8	52	0.0339942	0.0511292	-1.10527	0.000344197	0.000900875	1.27864	NA
a104689;10	768	33	36	39	0.292421	0.32675	0.19019	0.481959	0.486835	-0.0108687	NA
a104694;15	364	23	9	38	0.00959322	0.0165122	-1.28898	0.10996	0.148282	0.472489	NA
a10469;115	2637	1433	1361	1486	0.42965	0.44526	-0.0097123	9.4624e-05	0.000278358	-0.199481	PREDICTED: similar to ring finger protein 3 [Canis familiaris]
a1046;164	393	192	134	288	0.00247116	0.00483936	-0.454214	0.00645715	0.0126224	0.333086	NA
a10470;115	481	290	197	199	9.63051e-05	0.000246255	-0.493198	7.18285e-10	4.2303e-09	-0.795161	NA
a104717;17	512	62	33	19	0.0028714	0.00554447	-0.845143	8.47538e-09	4.47147e-08	-1.95815	LOC504404 protein [Bos taurus]
a104728;16	595	59	22	40	3.79846e-05	0.000105185	-1.35855	0.00274058	0.00589098	-0.812592	NA
a104737;14	335	29	26	2	0.408271	0.426733	-0.092882	9.3672e-09	4.91899e-08	-4.10986	NA
a10473;160	3854	2692	2380	3570	0.00266505	0.00519535	-0.113058	1.18563e-05	4.13313e-05	0.155369	PREDICTED: transmembrane 9 superfamily member 4 isoform 1 [Callithrix jacchus]
a104744;16	365	49	14	16	7.91976e-06	2.46782e-05	-1.7427	6.23518e-07	2.61637e-06	-1.86659	NA
a104747;16	732	30	80	51	2.08147e-07	8.04103e-07	1.4797	0.0614064	0.0901692	0.513658	KIAA0319-like [Bos taurus]
a10475;75	1539	1017	219	442	4.64567e-116	1.76205e-114	-2.15066	3.89488e-77	1.23824e-75	-1.45408	MKI67 FHA domain-interacting nucleolar phosphoprotein [Bos taurus]
a104763;14	392	18	18	28	0.445425	0.458153	0.0646592	0.193939	0.238281	0.385553	NA
a104767;12	520	49	3	26	7.82889e-12	4.77185e-11	-3.96509	0.000319044	0.000841905	-1.16615	PREDICTED: coiled-coil domain-containing protein 93-like [Macaca mulatta]
a10476;138	1185	835	616	729	4.65316e-07	1.71639e-06	-0.374187	4.32695e-10	2.60327e-09	-0.447734	NA
a10477;73	6649	2455	2012	2492	1.40046e-07	5.53491e-07	-0.222433	1.0088e-08	5.26906e-08	-0.230296	myosin-Va-like [Bos taurus]
a104784;14	387	23	15	22	0.126639	0.161341	-0.552012	0.228999	0.272553	-0.316007	NA
a104795;11	301	12	6	10	0.0996424	0.131512	-0.935341	0.200835	0.24389	-0.514911	NA
a10479;86	339	11	238	108	5.63112e-07	2.05918e-06	4.50005	1.61956e-07	7.36195e-07	3.04358	hypothetical protein, unlikely [Trypanosoma brucei gambiense DAL972]
a1047;1817	889	9944	4673	7069	0	0	-1.02482	9.16201e-246	3.97895e-244	-0.744197	psoriasis susceptibility 1 candidate gene 2 protein [Bos taurus]
a104804;11	360	21	18	10	0.370317	0.39568	-0.157733	0.00708883	0.0137166	-1.32227	NA
a104817;12	329	9	14	19	0.128998	0.163893	0.702089	0.080388	0.113673	0.826126	adenomatosis polyposis coli 2 [Bos taurus]
a10482;136	2349	1059	1327	2106	2.36997e-11	1.36023e-10	0.390125	2.11497e-12	1.6458e-11	0.739926	cyclic AMP-responsive element-binding protein 3-like protein 1 [Bos taurus]
a104839;18	304	25	24	22	0.4928	0.493936	0.00576556	0.149165	0.191053	-0.436301	NA
a10484;143	2641	1363	1834	2179	3.0268e-12	1.92978e-11	0.492867	1.89604e-12	1.48722e-11	0.425004	C2 domain-containing protein 2 [Bos taurus]
a104850;12	487	28	16	35	0.0498744	0.0715563	-0.742696	0.430417	0.447476	0.0700513	NA
a10485;88	1527	831	632	432	6.72293e-06	2.1115e-05	-0.330265	2.52785e-47	6.12848e-46	-1.19569	NA
a104863;16	317	33	22	7	0.0960096	0.127301	-0.520303	9.8944e-07	4.04001e-06	-2.48892	acyl-coenzyme A synthetase ACSM2, mitochondrial-like [Bos taurus]
a10486;91	664	190	245	369	0.000952417	0.00201981	0.431442	1.15201e-08	5.98144e-08	0.705745	NA
a104872;12	476	5	29	42	2.16971e-05	6.28984e-05	2.60071	8.87785e-06	3.15667e-05	2.81851	NA
a104883;14	743	17	62	67	5.45637e-08	2.26194e-07	1.93139	7.19415e-07	2.99155e-06	1.72675	NA
a104887;11	489	26	13	29	0.0268976	0.0415536	-0.935341	0.399372	0.422621	-0.0943355	interleukin-17B [Bos taurus]
a10488;88	1281	531	448	604	0.025495	0.0395872	-0.180554	0.220017	0.263343	-0.0660401	acyl-CoA-binding domain-containing protein 6 [Bos taurus]
a10489;128	1358	933	700	762	5.59504e-07	2.04721e-06	-0.349863	4.65332e-15	4.83626e-14	-0.543963	PREDICTED: ubiquitin-like protein 7-like isoform 2 [Pongo abelii]
a1048;553	1894	3889	3245	7669	4.79155e-09	2.22681e-08	-0.196522	2.51232e-12	1.92632e-11	0.727762	corneodesmosin [Bos taurus]
a104913;14	398	10	35	33	4.35558e-05	0.000118834	1.87201	0.00142973	0.0032831	1.47059	NA
a104918;13	322	16	10	28	0.149462	0.186135	-0.613413	0.112675	0.151231	0.555478	NA
a104920;11	319	11	13	14	0.304351	0.337128	0.305667	0.44483	0.458227	0.0960466	NA
a104923;11	386	19	18	24	0.490893	0.492236	-0.0133433	0.431626	0.448377	0.0851582	NA
a104929;13	551	44	22	27	0.00575123	0.0104176	-0.935341	0.00296898	0.00634348	-0.956421	Gcn2-like [Bos taurus]
a104939;11	671	37	3	50	1.14029e-08	5.09541e-08	-3.55983	0.284789	0.323821	0.182526	PREDICTED: myelin proteolipid protein-like isoform 9 [Macaca mulatta]
a10494;103	1719	924	671	834	2.47949e-08	1.07094e-07	-0.396921	3.1959e-09	1.76378e-08	-0.399722	PREDICTED: protein yippee-like 1-like [Danio rerio]
a10495;99	493	369	98	170	6.45504e-36	1.17953e-34	-1.84811	6.72872e-27	1.09911e-25	-1.36996	NA
a104966;15	324	16	10	38	0.149462	0.186135	-0.613413	0.0090234	0.0169365	0.996051	NA
a104977;12	741	12	33	70	0.000486173	0.00109195	1.52409	8.20739e-08	3.86622e-07	2.29244	NA
a10497;109	1184	423	733	654	8.35998e-14	6.67141e-13	0.857815	1.25952e-05	4.37147e-05	0.376756	RING finger protein 166 [Bos taurus]
a1049;1540	6338	45460	35752	57448	1.53637e-169	6.76196e-168	-0.281914	4.77435e-11	3.15791e-10	0.0857822	PREDICTED: periplakin [Bos taurus]
a104;7618	1236	30924	47978	52552	9.03863e-11	4.92467e-10	0.698305	8.74409e-11	5.6231e-10	0.513142	unnamed protein product [Mus musculus]
a105002;14	389	12	10	47	0.379372	0.402406	-0.198375	3.11894e-05	0.000100926	1.71775	NA
a105003;11	414	24	4	41	8.30406e-05	0.00021537	-2.5203	0.0814254	0.114988	0.520713	guanylate binding protein family, member 6-like [Bos taurus]
a10500;109	944	279	568	576	1.08025e-13	8.52502e-13	1.09029	0	0	0.793927	PREDICTED: b-cell lymphoma/leukemia 11B-like [Pongo abelii]
a105017;14	713	54	34	52	0.0276804	0.0426697	-0.602765	0.136144	0.177333	-0.306325	NA
a105018;10	358	24	9	13	0.00654714	0.0117291	-1.35038	0.00985594	0.0183002	-1.1364	NA
a10501;133	2803	2968	934	1355	3.56776e-225	1.67856e-223	-1.60334	8.91562e-205	3.77515e-203	-1.38307	PREDICTED: premature ovarian failure, 1B [Oryctolagus cuniculus]
a105026;15	459	6	54	24	9.22558e-06	2.84467e-05	3.23458	0.00216034	0.00475389	1.74812	NA
a10504;140	1350	1045	755	764	1.8251e-09	8.81814e-09	-0.404295	2.66878e-25	4.16275e-24	-0.703735	serine/threonine protein kinase pim-3-like [Bos taurus]
a105058;17	435	23	37	30	0.024246	0.037802	0.750551	0.378335	0.405668	0.131452	NA
a10505;65	3244	1163	756	1068	3.54522e-17	3.52641e-16	-0.556734	4.29351e-10	2.5841e-09	-0.374816	PREDICTED: similar to Serine/threonine-protein kinase ULK2 (Unc-51-like kinase 2) [Equus caballus]
a105061;11	456	11	23	14	0.0147701	0.0243233	1.12879	0.44483	0.458227	0.0960466	NA
a105063;13	643	22	21	44	0.499604	0.499701	-0.00245495	0.0227011	0.0381874	0.748123	PREDICTED: voltage-dependent calcium channel subunit alpha-2/delta-2-like [Ailuropoda melanoleuca]
a10506;58	687	97	256	74	1.56541e-14	1.33073e-13	1.46475	0.00186169	0.00416585	-0.642336	NA
a105071;18	551	25	71	37	3.1991e-07	1.209e-06	1.57055	0.205454	0.248544	0.31372	NA
a10507;90	1535	920	492	476	9.70314e-27	1.3895e-25	-0.838316	1.24677e-52	3.2522e-51	-1.20255	small subunit of serine palmitoyltransferase B [Bos taurus]
a105090;12	374	26	12	17	0.0168889	0.0273923	-1.05082	0.0262062	0.0432344	-0.864854	O-sialoglycoprotein endopeptidase-like 1 [Bos taurus]
a105094;11	575	15	31	33	0.0061054	0.0110195	1.11196	0.0231788	0.0388997	0.885627	NA
a105095;10	324	20	13	15	0.142179	0.178218	-0.556829	0.0870044	0.121571	-0.666914	NA
a105096;9	726	47	18	21	0.000283265	0.000668063	-1.32	5.10564e-05	0.000157966	-1.41415	NA
a105110;13	745	68	19	49	1.19434e-07	4.76669e-07	-1.77488	0.00346317	0.00724525	-0.72463	alpha-kinase 1 [Bos taurus]
a105112;19	356	33	33	33	0.426966	0.443494	0.0646592	0.236765	0.280274	-0.251877	NA
a10511;92	2889	1408	1005	1418	5.27606e-13	3.76835e-12	-0.421793	4.28065e-06	1.59928e-05	-0.241667	myelin protein zero-like protein 1 precursor [Bos taurus]
a105125;14	416	26	7	47	0.000646119	0.00141783	-1.82843	0.0437339	0.0675563	0.602272	tyrosyl-DNA phosphodiesterase 1 [Bos taurus]
a10512;157	1310	1064	643	1143	5.92683e-21	6.94949e-20	-0.661948	0.00782679	0.0149238	-0.148549	Junction-mediating and -regulatory protein-like [Bos taurus]
a10513;163	2643	1680	2088	2167	9.1227e-13	6.33073e-12	0.37832	0.00691937	0.0134345	0.115361	PREDICTED: interleukin 17A receptor [Bos taurus]
a105144;14	487	26	26	37	0.434903	0.44993	0.0646592	0.248718	0.291658	0.257137	M-phase inducer phosphatase 1 [Bos taurus]
a105150;9	641	36	12	34	0.000413995	0.00094022	-1.5203	0.164813	0.207322	-0.334339	PREDICTED: SHC SH2 domain-binding protein 1-like, partial [Sus scrofa]
a105158;11	805	47	42	36	0.376917	0.400689	-0.0976122	0.0226282	0.0381124	-0.636541	NA
a105169;12	668	23	10	68	0.0169038	0.0273979	-1.13697	3.56981e-05	0.000114099	1.31202	NA
a10516;153	947	484	663	801	7.18622e-10	3.60655e-09	0.518661	3.78862e-09	2.07365e-08	0.474918	probable cysteinyl-tRNA synthetase, mitochondrial precursor [Bos taurus]
a10517;156	2069	1297	1209	1975	0.262466	0.298753	-0.036705	2.07168e-12	1.61467e-11	0.354797	WD repeat-containing protein 46 [Bos taurus]
a105180;10	468	15	23	30	0.0773508	0.10532	0.681331	0.0505406	0.0764337	0.748123	NA
a10518;190	1611	1434	1581	1345	4.65783e-05	0.00012668	0.205452	1.59885e-10	1.00016e-09	-0.344316	heme oxygenase 1 [Bos taurus]
a10519;79	1487	837	382	422	1.12553e-35	2.04983e-34	-1.067	2.34242e-50	5.95831e-49	-1.23986	NA
a1051;731	3203	11227	11181	11312	0.00115504	0.00241356	0.058736	2.5258e-36	5.12442e-35	-0.240995	eukaryotic translation initiation factor 3, subunit 5 epsilon, 47kDa-like isoform 1 [Bos taurus]
a10520;107	3355	1069	1538	2471	5.79758e-13	4.11779e-12	0.589453	1.55465e-12	1.23742e-11	0.956956	DEAH (Asp-Glu-Ala-His) box polypeptide 16 [Bos taurus]
a105211;13	439	18	13	43	0.224879	0.262435	-0.404826	0.00557024	0.0110597	1.00446	NA
a105249;12	413	37	8	24	9.05079e-06	2.7949e-05	-2.14479	0.00956315	0.0178189	-0.876368	NA
a10524;86	2234	927	574	1173	5.83299e-17	5.74273e-16	-0.626859	0.0835426	0.11752	0.087685	ETS translocation-like [Bos taurus]
a105251;12	370	31	18	6	0.0457419	0.0665753	-0.719612	1.05406e-06	4.28605e-06	-2.62111	NA
a105263;9	1431	98	18	57	2.92821e-14	2.44128e-13	-2.38013	5.73883e-06	2.09966e-05	-1.0337	ubiquitin specific peptidase 40 [Bos taurus]
a10526;188	362	393	153	212	1.66533e-23	2.15031e-22	-1.29634	6.8136e-22	9.43797e-21	-1.14234	deoxynucleotidyltransferase terminal-interacting protein 2 [Bos taurus]
a105274;12	353	30	11	16	0.00228314	0.00450637	-1.3828	0.00400125	0.00827596	-1.15877	NA
a10527;121	887	418	552	543	2.80368e-07	1.06678e-06	0.465825	0.0908728	0.126241	0.125573	NA
a105282;11	388	33	10	12	0.000334065	0.000771534	-1.65781	9.40407e-05	0.000276758	-1.71131	NA
a105288;14	337	33	11	12	0.000694928	0.0015106	-1.5203	9.40407e-05	0.000276758	-1.71131	NA
a105290;14	372	8	32	21	3.44568e-05	9.61155e-05	2.06466	0.0265837	0.0438079	1.14044	NA
a105292;17	322	62	0	15	4.37894e-19	4.74748e-18	0/unlimited	2.01597e-10	1.25231e-09	-2.29918	NA
a105298;13	322	9	20	18	0.0158449	0.025916	1.21666	0.105663	0.143238	0.748123	NA
a105299;13	335	21	3	20	0.000119785	0.00030194	-2.7427	0.234898	0.278276	-0.322266	NA
a1052;1963	2396	19066	20557	25895	0	0	0.173287	0	0	0.189795	PKM2 protein [Bos taurus]
a105305;9	407	13	23	13	0.0369845	0.0551564	0.887781	0.323648	0.358685	-0.251877	NA
a10530;75	1811	1134	292	455	1.21137e-109	4.47033e-108	-1.89272	7.65078e-96	2.67087e-94	-1.56936	NA
a105316;16	885	50	36	105	0.0978915	0.129627	-0.409272	0.000373096	0.00097018	0.818513	LRRN2 protein [Bos taurus]
a105328;12	393	23	7	28	0.00245323	0.00480655	-1.65155	0.475454	0.481205	0.0319162	BMX non-receptor tyrosine kinase [Bos taurus]
a10532;74	2026	1037	434	599	7.67274e-52	1.84559e-50	-1.19199	2.3402e-47	5.67634e-46	-1.04366	pleckstrin homology domain-containing family F member 2 [Bos taurus]
a105330;11	1003	64	57	33	0.349909	0.378011	-0.102451	2.95658e-05	9.60109e-05	-1.20748	TRPC2 protein [Bos taurus]
a105331;14	635	50	0	72	1.37484e-15	1.24789e-14	0/unlimited	0.153386	0.19502	0.274192	melanoma antigen recognized by T-cells 1 [Bos taurus]
a105346;13	634	53	18	34	2.88469e-05	8.12537e-05	-1.49334	0.00218447	0.00479539	-0.892334	THAP domain containing 9 [Bos taurus]
a105349;16	639	68	35	41	0.00120493	0.00250858	-0.893521	0.000232989	0.000633681	-0.981788	NA
a105356;11	603	17	29	37	0.028032	0.0430987	0.835177	0.0186325	0.0320956	0.870114	NA
a10535;153	1117	861	574	939	7.25834e-12	4.4409e-11	-0.520303	0.0312422	0.0504042	-0.126765	AMP-activated protein kinase gamma2 subunit-like [Bos taurus]
a105361;15	369	7	35	29	7.70269e-06	2.40537e-05	2.38659	0.000652443	0.00161864	1.79875	NA
a105368;13	342	13	34	6	0.00061697	0.00136184	1.45168	0.0246069	0.0409841	-1.36735	PREDICTED: LOW QUALITY PROTEIN: WD repeat-containing protein 93-like [Sus scrofa]
a10537;175	1027	961	605	940	1.8313e-16	1.74321e-15	-0.602942	9.05882e-06	3.21729e-05	-0.283752	diphosphoinositol polyphosphate phosphohydrolase 1 [Bos taurus]
a105396;13	360	48	0	11	5.26095e-15	4.61772e-14	0/unlimited	1.04658e-08	5.45942e-08	-2.37741	NA
a105400;16	392	16	10	50	0.149462	0.186135	-0.613413	0.000193198	0.000535012	1.39198	NA
a105403;12	695	58	22	31	5.48649e-05	0.00014732	-1.33389	0.000111785	0.000324057	-1.15566	NA
a105417;11	480	19	18	31	0.490893	0.492236	-0.0133433	0.143828	0.185514	0.454392	probable histone-lysine N-methyltransferase ASH1L [Bos taurus]
a105428;15	332	4	39	20	2.50661e-05	7.1523e-05	3.35006	0.00191119	0.00426438	2.07005	NA
a10543;149	777	424	611	572	2.97204e-11	1.69194e-10	0.591767	0.0256903	0.0424624	0.180074	MAX dimerization protein 4, isoform CRA_a [Homo sapiens]
a105467;13	650	39	29	40	0.154326	0.190829	-0.362762	0.251123	0.29398	-0.215351	hypothetical protein LOC534917 [Bos taurus]
a10546;99	1359	618	590	693	0.489623	0.491198	-0.00223264	0.138449	0.179718	-0.0866282	NA
a105476;8	601	11	32	24	0.000374282	0.000857042	1.60523	0.0478436	0.0728564	0.873654	NA
a10547;89	933	354	427	355	0.00060063	0.00132987	0.335146	0.0110742	0.0202187	-0.247807	NA
a105481;11	628	78	12	6	6.60929e-13	4.66698e-12	-2.63578	1.49007e-20	1.98184e-19	-3.95232	NA
a105484;16	697	9	83	63	1.7808e-06	6.0984e-06	3.26977	6.42559e-07	2.68938e-06	2.55548	NA
a1054;1914	1842	15643	17026	17415	0	0	0.186882	5.17846e-10	3.0936e-09	-0.0970635	alpha-enolase [Bos taurus]
a105502;14	437	10	33	33	0.000111375	0.000281797	1.78713	0.00142973	0.0032831	1.47059	NA
a105504;15	521	11	47	36	8.26952e-07	2.95319e-06	2.15982	0.000961839	0.00229706	1.45862	NA
a105510;18	429	28	37	47	0.0984183	0.130287	0.466758	0.0762214	0.108621	0.495357	NA
a105519;11	431	33	10	17	0.000334065	0.000771534	-1.65781	0.00200148	0.00444444	-1.20881	NA
a105525;17	325	47	6	20	4.14213e-09	1.93627e-08	-2.90497	2.78961e-05	9.11341e-05	-1.48454	NA
a10552;116	2333	1284	1066	1465	0.000320725	0.000743504	-0.203779	0.13163	0.172415	-0.0616213	integrator complex subunit 10 [Bos taurus]
a10554;112	2127	1508	522	1441	1.53498e-101	5.4793e-100	-1.46586	1.16585e-09	6.72036e-09	-0.317443	NA
a105553;21	391	19	23	54	0.224546	0.262124	0.340294	0.000323634	0.000852278	1.25508	Y+L amino acid transporter 2 [Bos taurus]
a10555;96	3655	1457	1689	1846	3.44284e-08	1.46336e-07	0.277828	0.0383271	0.0601858	0.0895249	EH domain-binding protein 1-like protein 1 [Bos taurus]
a105564;13	362	4	42	25	2.5063e-05	7.15765e-05	3.45698	0.000202457	0.000557884	2.39198	NA
a10556;73	980	444	190	371	2.13283e-22	2.64279e-21	-1.1599	2.21242e-07	9.85755e-07	-0.511017	NA
a10558;124	2391	1697	1146	1332	2.28726e-20	2.61817e-19	-0.50172	1.32518e-30	2.37209e-29	-0.601269	calcium uptake protein 1, mitochondrial [Bos taurus]
a105594;17	312	19	7	33	0.0129725	0.0216947	-1.37591	0.0971074	0.133047	0.54459	NA
a10559;61	1092	310	197	256	2.93811e-06	9.73451e-06	-0.589413	6.89256e-06	2.49254e-05	-0.528001	nuclear fragile X mental retardation protein interacting protein 2 isoform 2 [Bos taurus]
a105604;14	1924	149	91	148	0.000328599	0.000760287	-0.646715	0.0587701	0.0868798	-0.261592	Dedicator of cytokinesis 5-like [Bos taurus]
a105605;9	654	23	21	33	0.441762	0.45552	-0.0665853	0.252397	0.295316	0.268955	NA
a105606;12	351	8	7	33	0.437359	0.452043	-0.127986	0.000299931	0.000798483	1.79252	NA
a10560;111	1102	637	440	626	6.35669e-08	2.62024e-07	-0.469131	0.000322746	0.000850099	-0.277007	protein LSM12 homolog [Homo sapiens]
a105615;14	334	16	29	9	0.0188506	0.0302825	0.92264	0.0340843	0.0543989	-1.08195	NA
a105640;16	696	14	82	56	9.5339e-08	3.85579e-07	2.61486	4.62053e-06	1.71855e-05	1.74812	PREDICTED: myosin-binding protein C, fast-type-like [Sus scrofa]
a105642;11	453	32	6	26	1.30832e-05	3.93377e-05	-2.35038	0.073038	0.104628	-0.551437	NA
a105646;17	431	57	23	18	0.00013957	0.000348096	-1.24467	5.0434e-08	2.43593e-07	-1.91484	NA
a10565;117	473	214	167	353	0.024439	0.0380836	-0.293103	7.36957e-05	0.000221665	0.470181	cytochrome c oxidase assembly protein COX16 homolog, mitochondrial precursor [Bos taurus]
a105666;15	484	16	8	65	0.0672946	0.0934158	-0.935341	6.91198e-07	2.88019e-06	1.77049	PREDICTED: collagen type VI alpha 6-like [Bos taurus]
a10568;125	2441	1926	957	1409	2.4942e-65	7.0611e-64	-0.944358	7.40646e-45	1.73151e-43	-0.702813	NA
a105695;9	1310	53	50	51	0.474121	0.478854	-0.019405	0.137596	0.178982	-0.307372	NA
a105696;12	469	31	27	27	0.364132	0.390776	-0.13465	0.116393	0.155463	-0.451186	fms-related tyrosine kinase 4 [Bos taurus]
a105699;13	936	61	20	79	4.75687e-06	1.52741e-05	-1.54415	0.315021	0.351584	0.121167	PREDICTED: FERM, RhoGEF and pleckstrin domain protein 2 [Equus caballus]
a10569;151	1509	1107	1293	844	4.90491e-07	1.80586e-06	0.288726	4.88694e-23	7.04127e-22	-0.643217	PREDICTED: hypothetical protein LOC100511339 [Sus scrofa]
a105706;19	461	32	55	26	0.00375418	0.00709372	0.846019	0.073038	0.104628	-0.551437	NA
a10570;129	923	373	475	784	1.61233e-05	4.75785e-05	0.413411	1.15574e-13	1.07852e-12	0.819801	PREDICTED: similar to Hypothetical UPF0172 protein CG3501 [Canis familiaris]
a105716;11	473	50	3	16	4.23248e-12	2.65235e-11	-3.99423	3.71533e-07	1.60402e-06	-1.89573	NA
a10571;103	2335	1817	469	1105	6.23918e-174	2.77085e-172	-1.88924	3.02167e-72	9.31691e-71	-0.969389	serum paraoxonase/lactonase 3 [Bos taurus]
a105727;11	366	0	45	0	5.10703e-15	4.48582e-14	0/unlimited	0.456464	0.467568	0/unlimited	2-acylglycerol O-acyltransferase 1 [Bos taurus]
a105740;8	325	9	13	10	0.173263	0.210667	0.595174	0.431649	0.448145	-0.0998737	NA
a10576;88	4087	1456	1510	2056	0.0134813	0.0224443	0.117197	2.92997e-07	1.28541e-06	0.245953	homeodomain-interacting protein kinase 1 [Bos taurus]
a105770;13	364	15	16	23	0.38054	0.40297	0.157769	0.230521	0.273979	0.364795	PREDICTED: hypothetical protein LOC100403757 [Callithrix jacchus]
a105774;11	345	3	18	21	0.000334442	0.000771879	2.64962	0.000411318	0.0010605	2.55548	NA
a10577;102	2291	1105	701	1461	4.14423e-18	4.31263e-17	-0.591901	0.00428492	0.00878262	0.151033	mesoderm-specific transcript homolog protein [Bos taurus]
a105788;14	381	18	14	27	0.285762	0.320275	-0.297911	0.230685	0.274108	0.333086	NA
a10578;55	3075	991	647	777	1.22276e-14	1.04743e-13	-0.55046	9.54889e-19	1.18321e-17	-0.602847	WD repeat-containing protein mio [Bos taurus]
a1057;1018	1771	7281	9823	8002	1.15767e-11	6.88074e-11	0.496686	3.77614e-07	1.62813e-06	-0.115653	dynactin subunit 2 [Bos taurus]
a105803;9	462	12	12	29	0.454949	0.465774	0.0646592	0.0180145	0.0311217	1.02114	NA
a105806;10	334	3	19	20	0.000204023	0.000492273	2.72762	0.000653218	0.00161897	2.48509	NA
a10580;131	1013	419	649	899	0	0	0.695927	0	0	0.849494	PREDICTED: similar to CG34228 CG34228-PA [Equus caballus]
a10581;99	1702	629	902	844	4.44755e-13	3.21163e-12	0.584727	0.0116234	0.0211318	0.172306	hypoxia-inducible factor prolyl 4-hydroxylase [Bos taurus]
a105823;14	424	44	12	30	1.37585e-05	4.12507e-05	-1.80981	0.00874267	0.016489	-0.804418	NA
a105829;12	488	59	9	12	3.4849e-10	1.80038e-09	-2.64806	4.47129e-11	2.97166e-10	-2.54956	NA
a10584;38	502	124	27	42	1.24514e-15	1.13404e-14	-2.13465	1.58744e-14	1.60107e-13	-1.81376	NA
a10585;108	903	407	384	527	0.426028	0.442655	-0.0192632	0.102508	0.139632	0.120897	growth arrest and DNA damage-inducible proteins-interacting protein 1 [Bos taurus]
a105881;9	751	40	24	26	0.0350079	0.0524116	-0.672306	0.00755532	0.0144719	-0.873365	PREDICTED: putative RhoGAP protein-like [Bos taurus]
a10589;114	1293	741	648	713	0.0484509	0.0698588	-0.12882	2.42612e-05	8.01548e-05	-0.307448	NA
a1058;817	3488	13182	12064	14867	0.000252931	0.000600922	-0.0632017	2.86191e-06	1.09719e-05	-0.0783325	tumor necrosis factor receptor superfamily member 1A [Ovis aries]
a10591;86	2012	631	680	1035	0.0152078	0.024945	0.172554	7.42775e-11	4.81568e-10	0.462042	KIAA0881 protein [Homo sapiens]
a105923;13	443	27	26	24	0.488213	0.490024	0.0102115	0.147397	0.189312	-0.421802	NA
a105939;13	485	36	24	39	0.0862528	0.115714	-0.520303	0.337632	0.371115	-0.1364	hydroxysteroid 11-beta-dehydrogenase 1-like protein precursor [Bos taurus]
a10593;112	1609	909	720	882	7.75597e-05	0.000202336	-0.271624	7.4005e-06	2.65967e-05	-0.295378	transmembrane protein 179B [Bos taurus]
a10594;76	2881	1426	809	886	6.69457e-34	1.16274e-32	-0.753103	3.05429e-54	8.11361e-53	-0.938472	RUN and FYVE domain containing 1 [Bos taurus]
a10595;83	1425	751	398	504	1.02011e-22	1.28115e-21	-0.851385	3.43674e-24	5.15753e-23	-0.827266	PREDICTED: Obg-like ATPase 1 isoform 2 [Pan troglodytes]
a10596;167	679	413	495	625	0.000340883	0.000785232	0.325946	7.20496e-05	0.000217152	0.345838	cpG-binding protein [Bos taurus]
a105974;11	303	12	12	11	0.454949	0.465774	0.0646592	0.262608	0.30427	-0.377408	NA
a10597;146	2178	2327	839	1292	2.36904e-146	9.92008e-145	-1.40707	7.30284e-113	2.67887e-111	-1.10074	PREDICTED: bromodomain-containing protein 7 isoform 1 [Callithrix jacchus]
a105992;5	344	9	4	6	0.10425	0.136315	-1.10527	0.135264	0.176408	-0.836839	NA
a10599;135	1837	1062	907	1524	0.0062131	0.0111896	-0.16295	1.3827e-06	5.54684e-06	0.269202	TBC1 domain family, member 22A [Bos taurus]
a1059;1008	2313	10442	11203	11888	0	0	0.166146	0.000409608	0.00105662	-0.0647688	RAS-related C3 botulinum substrate 1, isoform CRA_b [Mus musculus]
a10601;158	322	151	249	334	4.05445e-08	1.70765e-07	0.786256	3.80768e-11	2.55116e-10	0.893423	PREDICTED: uncharacterized protein FLJ36031-like [Sus scrofa]
a106022;12	572	42	25	29	0.0296802	0.0453638	-0.683802	0.0114163	0.0208026	-0.786213	NA
a106025;12	385	23	11	29	0.0279488	0.042993	-0.999471	0.425909	0.443921	0.0825423	NA
a106033;13	345	51	4	1	1.59689e-11	9.33207e-11	-3.60777	5.69288e-17	6.50437e-16	-5.9243	NA
a106034;10	467	20	14	30	0.189156	0.227511	-0.449914	0.217909	0.26103	0.333086	NA
a106043;15	354	21	18	29	0.370317	0.39568	-0.157733	0.309749	0.346768	0.213787	NA
a106049;12	570	29	22	33	0.209398	0.247131	-0.33389	0.424185	0.442495	-0.0654636	NA
a106050;15	377	12	37	24	8.32058e-05	0.000215628	1.68915	0.0724518	0.103949	0.748123	NA
a106051;11	630	23	38	37	0.0183898	0.0296033	0.789025	0.131784	0.172596	0.434015	NA
a10606;89	2838	1128	907	1457	4.96235e-05	0.000134181	-0.249933	0.0201037	0.0343414	0.117357	E3 SUMO-protein ligase PIAS3 [Bos taurus]
a106082;16	616	55	31	41	0.00867649	0.0150809	-0.762504	0.011199	0.0204347	-0.675684	PREDICTED: similar to SNF1-like kinase 2 [Canis familiaris]
a106087;10	965	49	21	57	0.000742169	0.00160898	-1.15773	0.448099	0.460604	-0.0336966	ATP/GTP binding protein 1 [Bos taurus]
a106091;13	620	29	25	53	0.354979	0.38284	-0.149466	0.031395	0.0506332	0.618063	PREDICTED: LOW QUALITY PROTEIN: BAI1-associated protein 3-like [Sus scrofa]
a1060;1195	750	3171	3908	4929	0	0	0.366152	0	0	0.38448	selenoprotein W, 1 [Bos taurus]
a106103;18	345	59	13	16	3.28543e-08	1.40179e-07	-2.11754	2.93894e-09	1.62727e-08	-2.13452	NA
a106107;15	423	15	43	30	5.14424e-05	0.000138547	1.58403	0.0505406	0.0764337	0.748123	NA
a10610;93	2007	1142	679	760	1.19591e-23	1.55152e-22	-0.68542	1.27639e-36	2.60356e-35	-0.839368	syntaxin-12 [Bos taurus]
a106110;11	301	9	21	14	0.0106785	0.0182332	1.28705	0.277295	0.316704	0.385553	NA
a106143;16	391	53	7	22	6.14037e-10	3.09956e-09	-2.85591	6.54383e-06	2.37534e-05	-1.52037	NA
a10614;116	3472	2154	1408	2079	1.78777e-29	2.78414e-28	-0.548712	4.24328e-12	3.15647e-11	-0.303005	PREDICTED: CDW92 antigen isoform 2 [Bos taurus]
a10615;95	3801	1327	1506	2299	2.60426e-06	8.69586e-06	0.247213	9.51461e-14	8.96057e-13	0.540961	probable cation-transporting ATPase 13A2 [Bos taurus]
a10617;112	1279	766	415	818	8.5102e-22	1.02931e-20	-0.819574	0.0151416	0.0268048	-0.15712	DNA polymerase beta [Bos taurus]
a10619;91	2270	1088	921	890	0.00323552	0.00617006	-0.175746	3.86382e-17	4.44769e-16	-0.541678	mini-chromosome maintenance complex-binding protein [Bos taurus]
a1061;1601	1507	14204	5314	13153	0	0	-1.35377	2.84857e-96	9.97263e-95	-0.362782	cornulin-like [Bos taurus]
a106203;14	508	18	45	27	0.00015839	0.000390846	1.38659	0.230685	0.274108	0.333086	PREDICTED: ring finger protein 150 [Bos taurus]
a106207;13	416	2	69	1	6.01021e-05	0.000159971	5.17318	0.250148	0.293198	-1.25188	NA
a10620;166	1613	918	1094	1679	4.10894e-07	1.52538e-06	0.317706	5.44231e-13	4.6522e-12	0.619159	GDP-mannose pyrophosphorylase A [Bos taurus]
a10621;113	1035	514	500	723	0.391794	0.412071	0.024819	0.00189669	0.00423539	0.240351	shroom family member 3 [Bos taurus]
a106220;14	458	13	15	52	0.311324	0.343663	0.27111	9.83216e-06	3.47186e-05	1.74812	NA
a10622;118	1189	753	510	633	6.7336e-10	3.38978e-09	-0.497493	4.78709e-11	3.16506e-10	-0.502321	DNA-directed RNA polymerase III subunit RPC9 [Bos taurus]
a106237;11	438	115	144	130	0.0153413	0.0251467	0.389094	0.340057	0.373258	-0.074999	fibroblast growth factor receptor 4 [Bos taurus]
a10623;132	967	581	457	606	0.000874754	0.00187601	-0.281685	0.0112552	0.0205293	-0.191097	aminopeptidase N [Bos taurus]
a106244;10	801	46	25	42	0.0107052	0.0182747	-0.815047	0.105811	0.143275	-0.383121	transmembrane protein 107 [Bos taurus]
a10624;122	888	499	433	527	0.0698132	0.0963578	-0.140014	0.0273049	0.0448279	-0.173114	PREDICTED: similar to snRNP core protein SMX5d [Ornithorhynchus anatinus]
a10625;79	3443	987	1188	1696	4.23884e-08	1.78256e-07	0.332072	1.55098e-12	1.2351e-11	0.529137	leucine-rich repeats and immunoglobulin-like domains 2-like [Bos taurus]
a10627;86	2008	972	648	789	3.61088e-13	2.64873e-12	-0.520303	5.06523e-16	5.49578e-15	-0.552808	PREDICTED: ribosomal protein S6 kinase alpha-3-like [Sus scrofa]
a106294;18	383	24	16	41	0.134168	0.169393	-0.520303	0.0814254	0.114988	0.520713	C12orf51 protein [Homo sapiens]
a106298;11	936	69	22	46	7.81075e-07	2.79607e-06	-1.58443	0.0010319	0.00244482	-0.836839	NA
a10629;112	2927	1615	1423	1553	0.0122538	0.0206393	-0.117939	9.08969e-10	5.30435e-09	-0.308353	charged multivesicular body protein 7 [Bos taurus]
a106300;15	313	19	3	34	0.000357694	0.000821241	-2.59831	0.0788448	0.111718	0.587659	NA
a106302;12	323	18	18	9	0.445425	0.458153	0.0646592	0.0148755	0.0263703	-1.25188	NA
a106304;12	783	63	24	40	2.91502e-05	8.20563e-05	-1.32766	0.000809633	0.00196383	-0.907229	NA
a10630;83	1344	278	375	931	6.15851e-06	1.94068e-05	0.496465	0	0	1.49182	integrator complex subunit 1 [Bos taurus]
a106310;10	817	42	53	22	0.0896588	0.119735	0.400262	0.000688088	0.00169047	-1.18476	NA
a106311;17	304	36	23	11	0.0656479	0.0913519	-0.581704	9.03456e-06	3.20937e-05	-1.96237	NA
a106313;14	539	37	26	35	0.115632	0.149344	-0.444354	0.163087	0.205334	-0.332047	xylulose kinase [Bos taurus]
a106315;17	379	29	19	42	0.101327	0.133292	-0.545394	0.213416	0.256705	0.28246	NA
a106316;14	666	51	45	50	0.349119	0.377552	-0.115913	0.162996	0.205249	-0.280446	zinc finger protein 383 [Bos taurus]
a106323;13	429	29	23	21	0.254622	0.29113	-0.26976	0.0403925	0.0629232	-0.71754	NA
a106324;14	350	6	19	28	0.0033558	0.00638604	1.72762	0.000402326	0.00103945	1.97052	NA
a106329;14	465	21	30	36	0.0790973	0.107357	0.579232	0.0941474	0.129528	0.525731	NA
a106330;14	309	8	36	13	7.04922e-06	2.20889e-05	2.23458	0.256273	0.298826	0.448563	NA
a106332;10	326	27	6	16	0.000160083	0.000394647	-2.10527	0.0124214	0.0224641	-1.00676	NA
a106335;11	614	16	52	29	1.94649e-06	6.61508e-06	1.7651	0.0906871	0.126011	0.606104	NA
a10633;62	5831	1641	1543	1981	0.318455	0.350605	-0.0241779	0.341356	0.374257	0.0197769	PREDICTED: hypothetical protein [Bos taurus]
a106342;12	612	40	19	44	0.00517786	0.00946066	-1.00934	0.354671	0.385833	-0.114373	PREDICTED: similar to gamma tubulin ring complex protein (76p gene) [Canis familiaris]
a106349;15	405	31	39	4	0.127432	0.162288	0.395865	7.199e-08	3.41527e-07	-3.20607	LOC536930 protein [Bos taurus]
a106352;14	553	57	16	29	1.23661e-06	4.32666e-06	-1.76823	6.23718e-05	0.000190001	-1.22679	NA
a106355;10	429	22	11	20	0.0385098	0.0570243	-0.935341	0.189449	0.23368	-0.38938	NA
a10635;129	1873	1205	796	1389	1.49163e-16	1.42624e-15	-0.533534	0.20415	0.247207	-0.0468633	far upstream element-binding protein 3 [Bos taurus]
a106366;15	410	2	35	46	6.01034e-05	0.000159792	4.19394	4.84258e-05	0.000151194	4.27169	NA
a106367;13	741	45	26	60	0.0196886	0.0314482	-0.726754	0.287624	0.326493	0.163161	kelch repeat and BTB domain-containing protein 8 [Bos taurus]
a10636;124	514	262	274	296	0.1498	0.186379	0.129268	0.266414	0.307783	-0.0758464	NA
a106373;18	322	4	45	24	2.50625e-05	7.15938e-05	3.55651	0.000315548	0.000834159	2.33309	NA
a106374;14	497	60	15	19	1.3724e-07	5.43297e-07	-1.93534	2.41647e-08	1.20739e-07	-1.91084	NA
a106376;16	370	40	20	6	0.00804402	0.014142	-0.935341	3.40424e-09	1.87349e-08	-2.98884	PREDICTED: hypothetical protein [Bos taurus]
a106384;16	732	64	59	34	0.421214	0.438298	-0.0526977	4.77611e-05	0.000149389	-1.16441	PREDICTED: microtubule-actin cross-linking factor 1, isoform 4-like [Sus scrofa]
a106385;11	338	16	7	24	0.0406457	0.059736	-1.12799	0.244688	0.287626	0.333086	P protein-like [Bos taurus]
a106389;13	1170	36	113	70	1.0273e-11	6.15203e-11	1.71491	0.00779572	0.0148723	0.707481	C-X-C chemokine receptor type 6 [Bos taurus]
a106397;11	436	43	6	9	3.77811e-08	1.5975e-07	-2.77664	2.26563e-08	1.13612e-07	-2.50822	NA
a106399;13	620	34	21	60	0.0576443	0.0815981	-0.630486	0.0331192	0.0530776	0.567551	NA
a10639;97	2059	542	913	1251	2.41585e-13	1.82248e-12	0.816981	0	0	0.95484	F-box and leucine-rich repeat protein 6 [Bos taurus]
a106401;13	819	77	26	38	5.22982e-07	1.91965e-06	-1.50169	2.22949e-06	8.68698e-06	-1.27074	NA
a106407;11	644	32	46	12	0.0377898	0.0562209	0.588221	0.000153905	0.000433794	-1.66691	NA
a106413;13	344	1	40	10	0.000285733	0.000673463	5.38659	0.00765592	0.0146301	3.07005	NA
a106414;11	1216	31	20	128	0.0858175	0.115224	-0.567609	3.25195e-12	2.45096e-11	1.79393	prostaglandin G/H synthase 2 [Ovis aries]
a106415;9	682	28	19	38	0.126105	0.160721	-0.494768	0.305807	0.343031	0.188696	NA
a106418;14	1002	107	23	52	7.54984e-14	6.05541e-13	-2.15325	2.04033e-08	1.02998e-07	-1.2929	DumPY : shorter than wild-type family member (dpy-19)-like [Bos taurus]
a106422;12	445	24	0	44	5.18596e-08	2.16133e-07	0/unlimited	0.0444255	0.0685287	0.622592	slit homolog 1 protein-like [Bos taurus]
a106425;18	440	57	17	34	2.73054e-06	9.10514e-06	-1.68077	0.000588071	0.00147162	-0.997304	PREDICTED: hypothetical protein LOC100505564 [Homo sapiens]
a106426;10	849	60	20	35	7.08749e-06	2.21996e-05	-1.5203	0.000315694	0.000834073	-1.02948	NA
a106431;13	837	75	28	53	4.00547e-06	1.30137e-05	-1.3568	0.00168372	0.00380558	-0.752775	PREDICTED: solute carrier family 22 (extraneuronal monoamine transporter), member 3, partial [Bos taurus]
a106432;12	309	18	3	29	0.00061314	0.00135439	-2.5203	0.16157	0.203604	0.436179	KIAA1565 protein [Homo sapiens]
a10643;69	2126	983	359	691	7.43878e-62	2.02425e-60	-1.38855	4.14684e-27	6.81903e-26	-0.760382	PREDICTED: similar to Formin-binding protein 3 (Huntingtin yeast partner A) (Huntingtin-interacting protein HYPA/FBP11) (Fas-ligand associated factor 1) (NY-REN-6 antigen) isoform 2 [Canis familiaris]
a106441;14	325	22	11	22	0.0385098	0.0570243	-0.935341	0.278107	0.317159	-0.251877	NA
a106446;12	437	32	25	19	0.227302	0.26502	-0.291485	0.00735749	0.0141249	-1.00395	NA
a106449;10	366	29	14	10	0.0165146	0.0268491	-0.985967	0.000156027	0.000439245	-1.78793	NA
a106457;16	389	21	25	35	0.230525	0.268198	0.316198	0.114286	0.153125	0.485089	PREDICTED: bullous pemphigoid antigen 1, isoforms 6/9/10-like [Macaca mulatta]
a106458;15	308	20	18	16	0.429039	0.44488	-0.0873438	0.116857	0.155968	-0.573805	ataxia telangiectasia mutated-like [Bos taurus]
a10645;178	312	477	253	160	4.58551e-15	4.04002e-14	-0.850193	3.85768e-51	9.88427e-50	-1.82779	PREDICTED: caldesmon-like [Sus scrofa]
a106462;11	377	2	36	17	6.01028e-05	0.000159821	4.23458	0.000817264	0.00197985	2.83559	NA
a106464;15	463	18	28	45	0.0531045	0.0758781	0.702089	0.00310715	0.00660165	1.07005	PREDICTED: alpha 3 type VI collagen, partial [Bos taurus]
a106467;13	321	36	3	10	2.07187e-08	9.01463e-08	-3.5203	3.70711e-06	1.39626e-05	-2.09987	NA
a106469;12	383	40	4	16	1.06229e-08	4.76812e-08	-3.25727	5.27593e-05	0.000162896	-1.5738	DNA-directed DNA polymerase delta 1-like [Bos taurus]
a106475;10	487	12	19	34	0.085915	0.115305	0.727624	0.00369255	0.00768666	1.25062	NA
a10647;89	3188	1881	847	1331	7.2407e-80	2.30193e-78	-1.08641	5.31576e-49	1.32471e-47	-0.750866	protein CASC4 [Bos taurus]
a106480;14	369	21	15	29	0.197839	0.235995	-0.420768	0.309749	0.346768	0.213787	proline rich Gla (G-carboxyglutamic acid) 1-like [Bos taurus]
a106483;12	517	26	20	39	0.235583	0.272948	-0.313852	0.185327	0.229477	0.333086	NA
a106484;14	684	63	28	38	0.000251338	0.000597325	-1.10527	0.000380932	0.000989587	-0.981229	NA
a106493;11	471	39	13	22	0.000247325	0.0005884	-1.5203	0.00214116	0.00472057	-1.07785	NA
a106498;13	427	21	30	32	0.0790973	0.107357	0.579232	0.195198	0.239412	0.355806	NA
a106508;16	385	25	33	21	0.112329	0.145698	0.465197	0.118202	0.157061	-0.503416	low density lipoprotein receptor-related protein 8 [Bos taurus]
a106511;9	936	52	41	30	0.179493	0.217577	-0.278228	0.000639157	0.00159002	-1.04543	NA
a106514;9	451	24	16	14	0.134168	0.169393	-0.520303	0.0156604	0.0275553	-1.02948	tubby like protein 2 [Bos taurus]
a106516;9	544	29	14	24	0.0165146	0.0268491	-0.985967	0.092778	0.128004	-0.524895	NA
a106521;11	881	68	27	42	2.76007e-05	7.82845e-05	-1.26792	0.000341984	0.000896157	-0.947022	PREDICTED: pecanex-like protein C14orf135-like [Sus scrofa]
a106522;10	401	17	16	21	0.48426	0.486747	-0.0228036	0.463261	0.472378	0.0529778	NA
a106526;11	365	2	28	25	6.02272e-05	0.000159888	3.87201	5.96575e-05	0.000182355	3.39198	NA
a10652;104	2889	2015	832	1420	2.97789e-101	1.06145e-99	-1.21147	4.91725e-53	1.28882e-51	-0.756766	ensconsin [Bos taurus]
a106533;17	396	34	11	44	0.000461472	0.0010403	-1.56337	0.363439	0.39328	0.120092	melanocyte protein PMEL precursor [Bos taurus]
a106537;14	330	7	18	22	0.010794	0.0184017	1.42723	0.0100785	0.0186475	1.4002	hypothetical protein LOC100302527 [Bos taurus]
a106542;12	451	14	9	46	0.181389	0.219421	-0.572771	0.000206835	0.000568863	1.46433	NA
a106547;9	520	22	9	36	0.0139268	0.0230466	-1.22485	0.123005	0.162452	0.458617	solute carrier family 6 (neurotransmitter transporter), member 17, isoform CRA_c [Mus musculus]
a106549;19	371	67	16	16	1.35887e-08	6.01225e-08	-2.00143	3.16821e-11	2.13685e-10	-2.31797	NA
a10654;100	4426	1549	2134	2610	1.11144e-12	7.6288e-12	0.526882	4.5397e-13	3.93057e-12	0.500836	non-receptor tyrosine-protein kinase TYK2 [Bos taurus]
a106550;14	306	5	38	13	1.54486e-05	4.59033e-05	2.99066	0.0698664	0.10082	1.12663	NA
a106553;12	634	36	31	24	0.337061	0.366156	-0.151069	0.0131343	0.0235832	-0.836839	exocyst complex component 3-like protein [Bos taurus]
a106554;14	369	10	35	16	4.35558e-05	0.000118834	1.87201	0.241713	0.285142	0.426195	NA
a106555;17	534	39	37	43	0.487861	0.489746	-0.0112896	0.360151	0.390023	-0.111014	NA
a106558;10	429	12	18	16	0.114409	0.147883	0.649622	0.393942	0.417702	0.163161	NA
a106559;13	311	15	18	15	0.259439	0.295623	0.327694	0.312188	0.348846	-0.251877	NA
a10655;106	4454	2579	1429	2792	3.02668e-64	8.44685e-63	-0.787147	0.000245862	0.000666239	-0.13739	basonuclin 1 [Bos taurus]
a106560;10	668	55	14	26	5.49449e-07	2.01124e-06	-1.90935	2.90958e-05	9.4591e-05	-1.3328	LOC407241 protein [Bos taurus]
a106567;12	627	67	21	15	8.55162e-07	3.0505e-06	-1.60911	1.09419e-11	7.71746e-11	-2.41108	PREDICTED: inhibitor of nuclear factor kappa-B kinase-interacting protein-like [Pongo abelii]
a10656;83	2466	1223	729	973	5.66153e-25	7.70954e-24	-0.681774	2.09555e-21	2.86711e-20	-0.581789	discoidin, CUB and LCCL domain-containing protein 2-like [Bos taurus]
a106570;18	462	16	28	69	0.0257924	0.0400079	0.872014	1.40643e-07	6.45979e-07	1.85665	phosphoinositide-3-kinase, catalytic, delta polypeptide [Bos taurus]
a106574;13	393	36	8	27	1.47218e-05	4.39444e-05	-2.10527	0.0339579	0.054273	-0.666914	NA
a106575;16	380	26	21	31	0.285983	0.320424	-0.243463	0.495825	0.496705	0.00187984	NA
a106579;15	594	52	16	50	1.04255e-05	3.18596e-05	-1.63578	0.139064	0.180411	-0.30846	solute carrier family 22 (extraneuronal monoamine transporter), member 3 [Bos taurus]
a10657;141	990	273	858	758	2.42362e-13	1.82708e-12	1.71674	0	0	1.22142	NA
a106582;13	490	11	36	34	6.09069e-05	0.000161365	1.77515	0.00197099	0.00438834	1.37615	NA
a106584;9	788	34	16	42	0.00855021	0.0149063	-1.0228	0.442451	0.456681	0.0529778	NA
a106590;16	302	17	15	24	0.413834	0.43195	-0.115913	0.303745	0.34115	0.245623	NA
a10659;100	3948	1607	1830	2159	1.54271e-07	6.0756e-07	0.252133	0.000121063	0.000349027	0.174117	glycine-, glutamate-, thienylcyclohexylpiperidine-binding protein-like [Bos taurus]
a106600;13	391	2	36	34	6.01028e-05	0.000159821	4.23458	4.85058e-05	0.000151146	3.83559	NA
a106604;10	539	17	25	28	0.085576	0.114939	0.621053	0.150184	0.192037	0.468015	Notch homolog 4-like [Bos taurus]
a106606;12	448	38	8	16	5.54143e-06	1.76131e-05	-2.18327	0.000132889	0.000380065	-1.4998	NA
a106609;11	594	55	22	14	0.000161174	0.000396809	-1.25727	4.01784e-09	2.19618e-08	-2.22588	retinoblastoma 1 [Bos taurus]
a106611;12	307	17	24	0	0.110059	0.143134	0.562159	7.40135e-07	3.07472e-06	0/unlimited	NA
a106612;12	309	19	2	23	9.05344e-05	0.000232607	-3.18327	0.486196	0.490042	0.0237577	NA
a106613;16	532	17	65	39	2.45537e-08	1.06113e-07	1.99956	0.010823	0.0198467	0.946063	NA
a106616;15	365	29	16	27	0.0379882	0.0564861	-0.793322	0.177179	0.220973	-0.35497	hCG22909-like [Bos taurus]
a106617;15	401	25	37	18	0.0452738	0.0659624	0.630256	0.0508278	0.0768113	-0.725808	Meis homeobox 2 isoform 2 [Bos taurus]
a10661;117	2693	1345	1358	1788	0.0784848	0.106601	0.0785366	0.00112408	0.00264808	0.158864	solute carrier family 15 member 4 [Bos taurus]
a106621;12	773	31	36	55	0.214396	0.252148	0.280388	0.0376902	0.0593317	0.575287	NA
a106622;12	587	42	13	38	7.20642e-05	0.000188485	-1.62722	0.109018	0.147171	-0.396267	NA
a106624;13	422	15	20	22	0.166554	0.204018	0.479697	0.275219	0.315124	0.300664	purinergic receptor P2Y, G-protein coupled, 10 [Bos taurus]
a106625;16	447	30	18	45	0.0590029	0.0831463	-0.672306	0.167302	0.210151	0.333086	NA
a106631;13	514	22	30	38	0.103322	0.13537	0.512118	0.0839736	0.118018	0.536619	NA
a106632;11	638	38	28	24	0.149471	0.186031	-0.375913	0.00690353	0.0134085	-0.914842	NA
a106636;12	345	8	37	8	5.43241e-06	1.73159e-05	2.27411	0.357546	0.388255	-0.251877	NA
a106637;13	794	61	54	23	0.341676	0.3704	-0.111191	3.07117e-07	1.34328e-06	-1.65905	NA
a106638;10	323	4	27	4	3.06178e-05	8.59977e-05	2.81955	0.39392	0.418072	-0.251877	NA
a106641;17	331	8	23	41	0.00238753	0.00468727	1.58822	1.10069e-05	3.85687e-05	2.10568	NA
a106643;10	456	37	5	16	2.60637e-07	9.94173e-07	-2.82287	0.000208834	0.000573558	-1.46133	NA
a106645;8	894	60	26	22	0.000247032	0.00058853	-1.14179	2.44304e-07	1.08174e-06	-1.69934	NA
a106647;13	491	60	8	19	5.26089e-11	2.93192e-10	-2.84223	2.41647e-08	1.20739e-07	-1.91084	NA
a106648;11	328	17	22	1	0.175577	0.213133	0.436628	7.97928e-06	2.85193e-05	-4.33934	PREDICTED: probable sodium-coupled neutral amino acid transporter 6-like [Sus scrofa]
a10664;56	492	69	125	202	6.86355e-06	2.15304e-05	0.921919	4.08307e-12	3.04305e-11	1.29781	PREDICTED: hypothetical protein [Bos taurus]
a106650;16	487	9	52	39	1.78272e-06	6.09966e-06	2.59517	6.11409e-05	0.000186471	1.8636	NA
a106652;13	343	32	16	18	0.015913	0.0260096	-0.935341	0.00475657	0.00961137	-1.08195	NA
a106657;19	430	21	26	59	0.190243	0.228602	0.372782	0.000205924	0.000566738	1.23845	adenomatosis polyposis coli 2 [Bos taurus]
a106659;12	443	16	32	25	0.0069651	0.0124187	1.06466	0.204529	0.247577	0.391979	NA
a10665;84	4222	2039	1155	1826	7.68065e-48	1.73372e-46	-0.75531	4.3028e-19	5.40662e-18	-0.411052	NA
a106660;15	743	27	63	59	2.7418e-05	7.77887e-05	1.28705	0.00386477	0.00801781	0.875879	NA
a106663;10	609	24	8	48	0.00336144	0.00639257	-1.5203	0.0181865	0.0313956	0.748123	ATP-dependent helicase ATRX isoform 2 [Bos taurus]
a106667;15	328	15	13	31	0.401772	0.421366	-0.141792	0.0392781	0.0613896	0.795429	NA
a106676;16	395	8	74	0	3.12287e-06	1.03153e-05	3.27411	0.000860311	0.00207426	0/unlimited	NA
a106678;14	312	15	20	14	0.166554	0.204018	0.479697	0.253359	0.296068	-0.351412	NA
a10667;161	456	259	572	157	1.82077e-13	1.39837e-12	1.20772	5.37462e-12	3.95551e-11	-0.974064	RecName: Full=Protein S100-A9; AltName: Full=BEE22; AltName: Full=Calgranulin-B; AltName: Full=Neutrophil cytosolic 23 kDa protein; Short=p23; AltName: Full=S100 calcium-binding protein A9
a106680;12	398	23	10	27	0.0169038	0.0273979	-1.13697	0.473712	0.480174	-0.0205512	NA
a106683;15	524	67	17	22	3.38604e-08	1.44102e-07	-1.91397	7.47307e-09	3.96182e-08	-1.85853	NA
a10668;171	575	643	320	381	4.85519e-23	6.17017e-22	-0.942088	1.6745e-28	2.84891e-27	-1.0069	NA
a106699;12	546	19	27	42	0.0931274	0.123877	0.571619	0.0115296	0.0209916	0.892513	NA
a10669;107	4401	2221	2332	2323	0.000796563	0.00171709	0.135018	6.286e-06	2.28691e-05	-0.187097	KIAA0770 protein-like [Bos taurus]
a1066;1355	1550	9513	7817	10952	1.3121e-23	1.70092e-22	-0.218626	0.0080633	0.015336	-0.0486547	KIAA0120 [Homo sapiens]
a106702;13	388	37	16	15	0.00318598	0.00608528	-1.14479	0.00011051	0.000320796	-1.55444	NA
a106705;15	419	17	39	27	0.00091799	0.00195894	1.2626	0.181685	0.225761	0.415548	FYVE, RhoGEF and PH domain-containing protein 2 [Bos taurus]
a106707;16	732	84	21	58	5.35198e-10	2.71597e-09	-1.93534	0.000635306	0.00158168	-0.786213	NA
a10670;85	2818	1150	1186	1314	0.0337694	0.0508238	0.109129	0.152985	0.194566	-0.0595453	NA
a106711;11	316	27	9	6	0.00197874	0.00394535	-1.5203	1.21046e-05	4.21251e-05	-2.4218	NA
a106712;6	332	9	7	7	0.348482	0.377054	-0.297911	0.198227	0.242112	-0.614447	zinc finger protein 420 [Bos taurus]
a106713;10	313	9	14	12	0.128998	0.163893	0.702089	0.410923	0.431516	0.163161	zinc finger protein 774 [Bos taurus]
a106714;10	816	69	14	27	7.06102e-10	3.54952e-09	-2.23651	1.09645e-07	5.09103e-07	-1.60551	mineralocorticoid receptor [Bos taurus]
a106716;15	417	25	14	34	0.0542404	0.0773336	-0.771842	0.313532	0.350041	0.19173	Zinc finger protein 606-like [Bos taurus]
a10671;124	1168	529	639	829	3.36988e-05	9.40678e-05	0.337207	3.29871e-07	1.43729e-06	0.396228	type-1 angiotensin II receptor-associated protein [Bos taurus]
a106726;12	907	27	58	64	0.000169419	0.000414305	1.16775	0.00102003	0.00242131	0.993236	NA
a106730;9	457	1	17	42	0.000311607	0.000726809	4.15212	0.000292737	0.000782491	5.14044	NA
a106734;14	520	12	38	50	5.28094e-05	0.000142038	1.72762	9.40665e-06	3.33179e-05	1.80702	NA
a106736;11	662	40	21	33	0.0121135	0.020431	-0.864951	0.0586325	0.086709	-0.529411	NA
a106744;12	516	41	26	22	0.0505454	0.0724566	-0.592453	0.0010119	0.00240382	-1.15	NA
a106748;11	321	8	25	16	0.000959966	0.00203499	1.70852	0.120482	0.159553	0.748123	synaptotagmin-17 [Bos taurus]
a106749;13	310	22	14	24	0.118871	0.152924	-0.587417	0.378374	0.405591	-0.126346	PREDICTED: platelet-activating factor acetylhydrolase 2, cytoplasmic-like [Macaca mulatta]
a106752;13	489	30	42	14	0.0550458	0.0782128	0.550086	0.00139291	0.00320334	-1.35141	NA
a106756;13	416	33	17	24	0.0180293	0.0290668	-0.892272	0.0322236	0.0517512	-0.711308	AT-rich interactive domain-containing protein 3B [Bos taurus]
a106759;15	380	7	29	36	6.13011e-05	0.000162226	2.11529	3.4449e-05	0.000110293	2.11069	NA
a106762;10	648	63	10	18	1.48624e-10	7.93577e-10	-2.59069	2.06879e-09	1.16344e-08	-2.05923	NA
a106764;10	427	35	0	19	3.23112e-11	1.83189e-10	0/unlimited	0.00242849	0.00528044	-1.13323	NA
a106765;10	459	6	22	33	0.000784718	0.00169286	1.93913	4.7585e-05	0.000148938	2.20755	G-protein coupled receptor 39 [Bos taurus]
a106770;11	332	26	10	13	0.00565405	0.0102696	-1.31385	0.00437985	0.00895515	-1.25188	NA
a106776;14	312	21	12	26	0.0781062	0.10621	-0.742696	0.454427	0.465865	0.0562455	NA
a10677;49	1710	342	425	430	0.000148259	0.000367861	0.378126	0.227651	0.271323	0.0784636	NA
a106784;17	318	13	31	18	0.00208438	0.00413901	1.31842	0.349206	0.381022	0.217609	NA
a106785;16	301	12	36	10	0.000130467	0.000326928	1.64962	0.200835	0.24389	-0.514911	NA
a106789;13	553	28	51	17	0.00266232	0.00519054	0.92973	0.0132171	0.0237137	-0.971769	NA
a10678;138	4368	2148	2894	3446	0	0	0.49473	0	0	0.430052	integrator complex subunit 3 [Bos taurus]
a106790;14	301	6	41	6	9.24767e-06	2.84818e-05	2.83725	0.374234	0.40225	-0.251877	NA
a106792;18	484	32	38	38	0.183784	0.221921	0.312587	0.489966	0.492231	-0.00394924	zinc finger protein 553 [Bos taurus]
a106796;15	442	32	22	35	0.118282	0.152276	-0.475909	0.360065	0.389982	-0.122594	NA
a1067;1366	558	5504	811	3798	0	0	-2.69805	6.47306e-151	2.55376e-149	-0.787117	NA
a10680;86	3994	2479	955	1441	3.97201e-140	1.63125e-138	-1.31153	1.08871e-108	3.9407e-107	-1.03456	structural maintenance of chromosomes protein 3 [Homo sapiens]
a106812;11	813	73	13	28	3.0876e-11	1.75458e-10	-2.42473	3.3189e-08	1.63672e-07	-1.63435	PREDICTED: hypothetical protein LOC100423481 [Macaca mulatta]
a106821;13	553	63	14	26	1.30577e-08	5.80161e-08	-2.10527	8.97922e-07	3.68964e-06	-1.52872	NA
a106823;12	623	12	51	45	4.03827e-07	1.50051e-06	2.15212	6.82547e-05	0.000206749	1.65501	NA
a106831;12	329	13	22	4	0.0505998	0.0725102	0.823651	0.00575008	0.0113712	-1.95232	PREDICTED: pleckstrin homology domain containing, family H (with MyTH4 domain) member 1 [Equus caballus]
a106842;11	725	32	59	32	0.00115486	0.00241329	0.947302	0.240078	0.283724	-0.251877	PREDICTED: similar to TRAF-interacting protein (RING finger protein 206) [Equus caballus]
a106843;12	502	13	23	37	0.0369845	0.0551564	0.887781	0.00247276	0.00537123	1.25714	NA
a106844;13	401	17	16	31	0.48426	0.486747	-0.0228036	0.0804363	0.113691	0.614857	disintegrin and metalloproteinase domain-containing protein 19 [Bos taurus]
a106848;11	349	6	18	27	0.00535943	0.00976625	1.64962	0.000616583	0.00153787	1.91805	plexin B3-like [Bos taurus]
a106849;12	321	16	22	11	0.135417	0.170821	0.524091	0.0793275	0.112329	-0.792445	separin [Bos taurus]
a106850;22	406	67	38	17	0.00462285	0.00857141	-0.753502	8.73843e-11	5.62388e-10	-2.2305	allograft inflammatory factor 1 [Bos taurus]
a106851;12	523	23	39	23	0.0138391	0.0229227	0.8265	0.273831	0.314253	-0.251877	NA
a106852;18	336	36	16	32	0.00445861	0.00829805	-1.10527	0.113432	0.152143	-0.421802	NA
a106854;11	546	25	32	19	0.137827	0.17352	0.420803	0.0691409	0.100036	-0.647805	sialic acid binding Ig-like lectin 1, sialoadhesin [Bos taurus]
a106857;13	766	24	30	65	0.164682	0.201855	0.386587	0.000167555	0.000469774	1.18553	NA
a106858;11	546	8	34	40	1.43213e-05	4.28387e-05	2.15212	1.64168e-05	5.57784e-05	2.07005	NA
a106861;11	531	51	15	12	7.39959e-06	2.31351e-05	-1.70088	5.21957e-09	2.81622e-08	-2.33934	NA
a106864;12	562	29	37	24	0.122779	0.157112	0.416132	0.092778	0.128004	-0.524895	NA
a106865;10	510	16	18	44	0.318887	0.350797	0.234584	0.00144665	0.00331583	1.20755	NA
a106870;12	417	25	18	26	0.182381	0.220412	-0.409272	0.310808	0.347569	-0.195293	NA
a106877;9	525	19	11	31	0.0941067	0.12506	-0.723837	0.143828	0.185514	0.454392	NA
a106885;11	304	14	8	23	0.126005	0.160706	-0.742696	0.177297	0.221058	0.46433	NA
a106889;12	1083	121	37	19	2.77474e-11	1.58329e-10	-1.64475	4.73551e-24	7.07417e-23	-2.92281	reverse transcriptase related protein
a10688;89	1412	810	388	598	3.65647e-31	5.93322e-30	-0.997206	2.11436e-19	2.69259e-18	-0.689653	NA
a106890;11	408	33	8	29	6.16862e-05	0.000163095	-1.97973	0.115319	0.154261	-0.43829	NA
a106892;11	375	35	8	11	2.38431e-05	6.84069e-05	-2.06462	1.53783e-05	5.27333e-05	-1.92173	NA
a106893;15	349	15	20	32	0.166554	0.204018	0.479697	0.0302871	0.0490542	0.841233	NA
a106894;14	423	34	18	27	0.0202386	0.0322183	-0.852879	0.0572541	0.0851552	-0.584452	carboxypeptidase E precursor [Bos taurus]
a106895;14	422	24	8	43	0.00336144	0.00639257	-1.5203	0.0547144	0.0818313	0.589426	NA
a106898;13	723	33	48	43	0.0312693	0.0475102	0.605228	0.354296	0.385489	0.129994	NA
a1068;586	2400	4548	7514	8320	1.39297e-11	8.19498e-11	0.789008	1.32551e-11	9.25464e-11	0.619475	PREDICTED: transcription elongation factor B (SIII), polypeptide 2-like [Oryctolagus cuniculus]
a106909;14	590	47	11	61	1.41904e-06	4.91229e-06	-2.0305	0.33324	0.367121	0.124272	PREDICTED: fibronectin type III domain containing 1 [Bos taurus]
a106912;9	1162	37	54	66	0.0232508	0.0364244	0.610093	0.0240673	0.0402526	0.583064	NA
a106915;17	402	17	23	48	0.139873	0.175594	0.500758	0.000706593	0.00173212	1.24562	rotatin-like [Bos taurus]
a106917;11	381	8	19	17	0.0132634	0.0221262	1.31259	0.0911327	0.126437	0.835586	NA
a106919;17	449	53	18	29	2.88469e-05	8.12537e-05	-1.49334	0.000286863	0.000767729	-1.12182	NA
a106923;10	563	11	32	29	0.000374282	0.000857042	1.60523	0.0106476	0.0195696	1.14667	NA
a106929;14	361	0	61	12	1.11022e-16	1.07198e-15	0/unlimited	0.000361387	0.000942677	0/unlimited	NA
a10692;108	1942	1266	625	1058	2.44532e-44	5.24266e-43	-0.95369	7.75244e-18	9.2401e-17	-0.510815	probable saccharopine dehydrogenase [Bos taurus]
a106931;13	457	74	0	6	1.39472e-22	1.74138e-21	0/unlimited	2.55574e-19	3.23789e-18	-3.87637	NA
a106932;8	567	18	30	12	0.0302634	0.0461869	0.801625	0.05858	0.0866927	-0.836839	NA
a106935;16	581	83	12	32	4.52091e-14	3.70777e-13	-2.72542	4.66476e-09	2.53638e-08	-1.62692	NA
a106936;11	361	28	12	14	0.00855073	0.0149016	-1.15773	0.00324639	0.00685155	-1.25188	NA
a106938;7	334	7	19	3	0.00698964	0.0124526	1.50523	0.0664403	0.0965707	-1.47427	NA
a10693;72	3267	1215	821	1260	4.62986e-15	4.07763e-14	-0.500843	0.000294819	0.000786109	-0.199409	dihydropyrimidine dehydrogenase [Bos taurus]
a106940;13	384	16	19	28	0.262905	0.299152	0.312587	0.112675	0.151231	0.555478	RecName: Full=Arylsulfatase K; Short=ASK; Flags: Precursor
a10694;88	1881	1425	327	524	4.20989e-153	1.79342e-151	-2.05894	8.0441e-134	3.07479e-132	-1.6952	hCG2033193 [Homo sapiens]
a106952;14	645	34	25	60	0.161453	0.198403	-0.378947	0.0331192	0.0530776	0.567551	NA
a106954;12	347	13	4	32	0.0194925	0.0312015	-1.63578	0.0120955	0.0219219	1.04768	NA
a106956;13	876	98	26	36	7.98535e-11	4.37457e-10	-1.84961	6.19713e-11	4.04506e-10	-1.69666	PREDICTED: LOW QUALITY PROTEIN: cullin-5-like [Ailuropoda melanoleuca]
a10695;128	1972	1159	1102	1364	0.447202	0.459552	-0.0080971	0.383742	0.409798	-0.0169137	leucine-rich repeats and calponin homology (CH) domain containing 4 [Bos taurus]
a106961;11	529	28	30	22	0.332554	0.363087	0.164195	0.0713772	0.10266	-0.5998	NA
a106963;15	557	28	52	35	0.00195789	0.00390838	0.957744	0.430417	0.447476	0.0700513	NA
a10696;138	828	476	501	660	0.0667639	0.0927748	0.138508	0.00560512	0.0111242	0.219628	adrenodoxin-like protein, mitochondrial precursor [Bos taurus]
a106974;11	592	14	28	43	0.0108163	0.0184282	1.06466	0.000598803	0.0014966	1.36703	NA
a106985;12	861	34	32	82	0.476092	0.480346	-0.0228036	0.000177326	0.000494277	1.01821	NA
a106986;10	339	9	10	16	0.372926	0.397728	0.216662	0.175919	0.219663	0.578198	Thrombospondin type-1 domain-containing protein 7A-like [Bos taurus]
a10698;74	1040	274	355	418	7.43642e-05	0.000194257	0.438302	0.00067786	0.00166985	0.35745	NA
a106992;10	334	0	10	37	0.000380554	0.000870045	0/unlimited	8.68332e-11	5.59134e-10	0/unlimited	NA
a106999;15	555	64	13	28	2.87291e-09	1.36604e-08	-2.2349	1.9762e-06	7.76194e-06	-1.44452	homeobox A7-like [Bos taurus]
a10699;164	3476	2592	2296	3294	0.00381171	0.00718819	-0.110284	0.0065676	0.0128204	0.0938981	immunoglobulin superfamily, member 8 [Bos taurus]
a106;4582	2446	52123	60483	77710	4.52399e-11	2.53577e-10	0.279269	2.56541e-11	1.74405e-10	0.324303	reverse transcriptase-like [Bos taurus]
a107008;12	1305	33	52	133	0.0118207	0.0200103	0.720705	2.4033e-12	1.85082e-11	1.75901	11 beta-hydroxysteroid dehydrogenase type 2 [Ovis aries]
a10700;114	2114	823	637	1857	2.94448e-05	8.28286e-05	-0.30494	3.01426e-13	2.66501e-12	0.922133	THO complex 6 homolog [Bos taurus]
a107015;17	381	6	21	50	0.00128249	0.00265319	1.87201	4.67155e-06	1.73391e-05	2.80702	NA
a107017;11	678	80	9	16	3.1569e-15	2.81009e-14	-3.08734	1.41712e-14	1.43488e-13	-2.5738	PREDICTED: hypothetical protein [Bos taurus]
a107021;11	413	10	37	22	1.70592e-05	5.01175e-05	1.95218	0.0537587	0.080698	0.885627	Nose Resistant to Fluoxetine family member (nrf-6)-like [Bos taurus]
a107024;17	454	27	7	66	0.000408546	0.000928575	-1.88287	0.00058185	0.0014569	1.03763	NA
a107025;12	331	11	15	23	0.187797	0.226325	0.512118	0.0629351	0.092074	0.812254	BTB/POZ KELCH domain protein-like [Bos taurus]
a107027;15	388	3	41	27	3.92528e-05	0.000108267	3.83725	4.65659e-05	0.000145967	2.91805	NA
a107036;10	745	77	12	19	1.12494e-12	7.71769e-12	-2.61716	2.20462e-12	1.71312e-11	-2.27074	carbonic anhydrase 5B, mitochondrial [Bos taurus]
a107038;18	487	41	26	46	0.0505454	0.0724566	-0.592453	0.386861	0.412657	-0.0858668	PREDICTED: UPF0489 protein C5orf22-like [Sus scrofa]
a107039;14	1052	55	44	102	0.190567	0.228656	-0.257269	0.00370383	0.0077072	0.639189	NA
a10703;120	571	206	201	409	0.418631	0.436095	0.0292104	4.84539e-10	2.90416e-09	0.73758	PREDICTED: arginine-glutamic acid dipeptide repeats protein-like [Sus scrofa]
a107041;13	401	10	11	48	0.374988	0.399446	0.202163	3.72797e-06	1.40314e-05	2.01116	NA
a10704;91	1883	917	739	730	0.000264562	0.000626102	-0.246688	1.78545e-16	1.98411e-15	-0.580902	GTP:AMP phosphotransferase, mitochondrial [Bos taurus]
a107054;11	604	28	24	39	0.350115	0.378138	-0.157733	0.269086	0.310403	0.226171	myosin-binding protein H [Bos taurus]
a107055;10	1447	50	97	60	1.55192e-05	4.59976e-05	1.02072	0.488387	0.491066	0.0111577	villin-1 [Bos taurus]
a10705;126	2343	1128	1361	1652	3.51642e-09	1.65678e-08	0.335559	3.62141e-08	1.77948e-07	0.29857	rab GTPase-binding effector protein 2 [Bos taurus]
a107060;11	491	10	22	36	0.0126852	0.021291	1.20216	0.000463227	0.00118209	1.59612	NA
a107066;19	343	22	30	31	0.103322	0.13537	0.512118	0.279654	0.31862	0.242888	NA
a107067;13	544	37	22	19	0.0383045	0.0568892	-0.685363	0.00111219	0.00262127	-1.2134	poly [ADP-ribose] polymerase 8 [Mus musculus]
a107083;11	626	49	25	23	0.00466488	0.00862849	-0.906194	6.81212e-05	0.000206389	-1.34302	NA
a107085;11	429	5	28	20	2.64916e-05	7.52865e-05	2.55009	0.00480253	0.00968571	1.74812	MDN1, midasin homolog-like [Bos taurus]
a107089;14	412	4	12	50	0.0197102	0.0314669	1.64962	1.58702e-05	5.41893e-05	3.39198	NA
a10708;102	2328	1310	988	1038	7.84062e-09	3.56292e-08	-0.342325	3.57899e-23	5.18716e-22	-0.587637	family with sequence similarity 57, member A [Bos taurus]
a107092;11	479	4	23	45	8.17231e-05	0.000212278	2.58822	1.5877e-05	5.41955e-05	3.23998	G protein-coupled receptor 161 [Bos taurus]
a107097;15	477	44	8	38	2.70183e-07	1.02931e-06	-2.39477	0.0727724	0.104343	-0.463381	transmembrane protein 108 precursor [Bos taurus]
a10709;118	3876	3818	1007	1689	0	0	-1.85809	6.36312e-276	2.83358e-274	-1.42852	golgi autoantigen, golgin subfamily a, 4 [Bos taurus]
a1070;1801	2024	15731	16433	19846	0	0	0.127645	3.01293e-08	1.49152e-07	0.0833611	annexin A8 [Bos taurus]
a107104;14	367	24	25	20	0.381925	0.403484	0.123553	0.118205	0.157004	-0.514911	chromosome 1 open reading frame 150 [Homo sapiens]
a107106;11	346	23	16	14	0.167262	0.204755	-0.458903	0.0225721	0.0380316	-0.968084	ADP-ribosylation factor-like protein 6 [Bos taurus]
a107116;11	761	30	16	64	0.0286712	0.0439659	-0.842231	0.00364524	0.00759494	0.841233	protocadherin 18 precursor [Bos taurus]
a107117;13	609	29	31	48	0.333065	0.363496	0.160875	0.0819455	0.115536	0.475105	NA
a10711;132	1617	985	979	1136	0.195421	0.233488	0.0558444	0.230826	0.274235	-0.0461095	PREDICTED: dystonin [Bos taurus]
a107122;10	474	21	17	24	0.308903	0.341278	-0.240195	0.439292	0.453907	-0.0592317	NA
a107128;11	1311	94	19	77	6.53132e-13	4.61624e-12	-2.242	0.00729623	0.0140248	-0.539679	MAX gene-associated protein [Bos taurus]
a10712;138	1067	438	819	765	3.73812e-13	2.73839e-12	0.967592	4.6007e-11	3.05251e-10	0.552652	apolipoprotein A-I preproprotein [Bos taurus]
a107131;13	305	20	9	15	0.0284783	0.0437083	-1.08734	0.0870044	0.121571	-0.666914	PREDICTED: hypothetical protein [Bos taurus]
a107133;10	397	15	14	19	0.476748	0.480717	-0.0348764	0.437877	0.45273	0.0891602	NA
a10713;133	1111	1019	387	669	3.06713e-60	8.19202e-59	-1.33209	3.8867e-34	7.56367e-33	-0.858953	RecName: Full=Keratin-associated protein 15-1; AltName: Full=Keratin-associated protein 15.1
a107141;14	303	11	6	35	0.13906	0.174779	-0.80981	0.00138071	0.00317796	1.41797	PREDICTED: hypothetical protein [Bos taurus]
a107142;14	544	64	16	17	5.42398e-08	2.25041e-07	-1.93534	4.71516e-10	2.83042e-09	-2.16441	NA
a107143;12	363	1	30	28	0.000285737	0.000672714	4.97155	0.000293035	0.000782159	4.55548	NA
a107145;12	865	51	13	75	1.39709e-06	4.84895e-06	-1.90733	0.124273	0.163957	0.304517	distal-less homeobox 1, isoform CRA_f [Homo sapiens]
a107148;12	391	10	15	42	0.136682	0.172226	0.649622	4.29446e-05	0.000135698	1.81851	NA
a10714;76	3492	1864	730	1207	5.05857e-103	1.81894e-101	-1.28777	4.39088e-63	1.25099e-61	-0.878853	PREDICTED: isoleucyl-tRNA synthetase 2, mitochondrial [Equus caballus]
a107150;14	336	22	15	22	0.15924	0.196068	-0.487882	0.278107	0.317159	-0.251877	ubiquitin specific protease 16-like [Bos taurus]
a107151;10	315	3	17	17	0.000564874	0.00125355	2.56716	0.00265554	0.0057256	2.25062	NA
a107154;16	329	12	23	31	0.0239661	0.0373906	1.00326	0.00975723	0.0181461	1.11736	NA
a107155;14	661	50	34	43	0.0627153	0.0879049	-0.491734	0.05823	0.0862853	-0.469468	NA
a107156;16	431	35	21	37	0.0453165	0.0660139	-0.672306	0.303659	0.341131	-0.171706	PREDICTED: hypothetical protein [Bos taurus]
a107158;12	338	22	2	25	1.55148e-05	4.60332e-05	-3.39477	0.430651	0.447591	-0.0674522	TBC1 domain family, member 8 (with GRAM domain) isoform 1 [Bos taurus]
a10715;118	1855	1115	1105	844	0.199343	0.237538	0.0516619	8.3247e-24	1.23309e-22	-0.653606	prostatic acid phosphatase precursor [Bos taurus]
a107160;14	402	34	27	16	0.238297	0.275543	-0.267916	0.000776554	0.00189121	-1.33934	NA
a107161;17	448	44	16	37	0.000254778	0.000605076	-1.39477	0.0587806	0.0868888	-0.501855	NA
a107173;10	322	6	6	27	0.467189	0.474345	0.0646592	0.000616583	0.00153787	1.91805	Lim1-like [Bos taurus]
a107174;10	304	0	23	5	3.46012e-08	1.47007e-07	0/unlimited	0.0257853	0.0425958	0/unlimited	NA
a107175;11	545	10	42	35	2.29737e-06	7.73979e-06	2.13505	0.000677995	0.00166976	1.55548	NA
a107178;16	381	25	28	21	0.283285	0.318072	0.228158	0.118202	0.157061	-0.503416	NA
a107180;10	518	23	19	24	0.322204	0.353879	-0.210975	0.321551	0.356716	-0.190476	PREDICTED: probable ribonuclease ZC3H12C-like [Pongo abelii]
a107181;11	480	10	10	50	0.458619	0.468306	0.0646592	1.75145e-06	6.92655e-06	2.07005	TATA binding protein associated factor 4b-like [Bos taurus]
a107188;13	396	12	25	23	0.0118131	0.020003	1.12355	0.093118	0.128241	0.686723	NA
a107196;15	478	31	31	30	0.429139	0.444876	0.0646592	0.207082	0.250229	-0.299182	NA
a107202;15	576	42	27	48	0.0536703	0.0765874	-0.572771	0.418715	0.438311	-0.0592317	NA
a107205;14	315	7	45	6	5.41771e-06	1.72735e-05	2.74916	0.274933	0.315109	-0.474269	PREDICTED: 5-hydroxytryptamine (serotonin) receptor 6-like, partial [Bos taurus]
a107213;12	439	18	28	21	0.0531045	0.0758781	0.702089	0.467677	0.475898	-0.0294843	NA
a10721;103	1888	1005	559	1043	5.80808e-26	8.1115e-25	-0.781616	0.00093769	0.00224309	-0.198333	unnamed protein product [Mus musculus]
a107226;16	431	21	19	45	0.433515	0.448754	-0.0797307	0.012094	0.0219261	0.847659	NA
a107230;13	413	32	3	27	2.21432e-07	8.51207e-07	-3.35038	0.092828	0.128037	-0.496989	NA
a107231;12	1059	35	66	63	0.000455733	0.00102812	0.97977	0.0245073	0.0408494	0.59612	NA
a107236;16	450	49	12	35	1.4194e-06	4.91266e-06	-1.96509	0.0100022	0.0185262	-0.737304	transient receptor potential cation channel, subfamily V, member 4 isoform 2 [Bos taurus]
a107241;10	428	12	19	25	0.085915	0.115305	0.727624	0.0558273	0.0833473	0.807017	NA
a107242;13	578	27	35	34	0.117758	0.151697	0.439055	0.420615	0.439443	0.0806986	NA
a107245;13	422	24	35	13	0.0552495	0.0784739	0.60898	0.00985594	0.0183002	-1.1364	NA
a10724;115	1048	379	642	695	0	0	0.825035	3.09197e-12	2.33684e-11	0.622938	GTP cyclohydrolase 1 feedback regulatory protein [Bos taurus]
a107250;12	344	11	21	24	0.0301478	0.0460233	0.997545	0.0478436	0.0728564	0.873654	NA
a107254;11	361	17	19	12	0.320852	0.352584	0.225124	0.0817148	0.115277	-0.754377	NA
a107255;10	417	12	16	29	0.193993	0.231971	0.479697	0.0180145	0.0311217	1.02114	NA
a10725;152	1233	998	685	849	8.33883e-12	5.0585e-11	-0.478277	2.6245e-13	2.34127e-12	-0.485152	small cell adhesion glycoprotein [Bos taurus]
a107262;13	921	105	17	44	2.38749e-16	2.25473e-15	-2.56212	5.01746e-10	3.00034e-09	-1.50669	PREDICTED: similar to Adapter-related protein complex 4 epsilon 1 subunit (Epsilon subunit of AP-4) (AP-4 adapter complex epsilon subunit) [Canis familiaris]
a107264;13	313	6	21	18	0.00128249	0.00265319	1.87201	0.0221606	0.037412	1.33309	NA
a107274;18	342	25	14	33	0.0542404	0.0773336	-0.771842	0.355561	0.386565	0.148661	NA
a107276;10	430	26	7	23	0.000646119	0.00141783	-1.82843	0.14831	0.190387	-0.428755	NA
a10727;121	2233	930	1174	1667	1.05528e-10	5.71858e-10	0.400789	0	0	0.590075	PREDICTED: bifunctional polynucleotide phosphatase/kinase-like [Sus scrofa]
a107284;10	1085	48	46	63	0.494436	0.495268	0.0032587	0.31016	0.346959	0.140441	NA
a10728;95	2073	631	1029	1104	0	0	0.77019	0	0	0.555152	RecName: Full=Cytosolic Fe-S cluster assembly factor NARFL; AltName: Full=Iron-only hydrogenase-like protein 1; Short=IOP1; AltName: Full=Nuclear prelamin A recognition factor-like protein
a107291;14	388	29	6	27	5.96441e-05	0.000159001	-2.20836	0.177179	0.220973	-0.35497	echinoderm microtubule associated protein like 5 [Bos taurus]
a107295;17	332	40	10	14	1.47658e-05	4.40343e-05	-1.93534	1.27305e-05	4.41391e-05	-1.76645	PREDICTED: hypothetical protein [Bos taurus]
a107299;12	537	30	24	37	0.260488	0.296681	-0.257269	0.449196	0.461533	0.050686	NA
a10729;62	5801	2495	662	1977	2.80031e-231	1.32894e-229	-1.84948	2.39255e-42	5.38576e-41	-0.587604	PREDICTED: target of Nesh-SH3-like isoform 2 [Macaca mulatta]
a1072;1406	677	4547	2477	6110	1.53404e-117	5.84554e-116	-0.811662	3.0881e-10	1.88167e-09	0.174381	microsomal glutathione S-transferase 3 [Capra hircus]
a107303;12	457	27	20	28	0.196384	0.234479	-0.3683	0.300757	0.338417	-0.199409	nebulin [Bos taurus]
a107305;12	607	49	19	24	0.000246542	0.000587562	-1.30212	0.000117021	0.000338486	-1.28162	PREDICTED: similar to LOC526343 protein [Equus caballus]
a107308;18	409	28	35	31	0.145819	0.182069	0.386587	0.385389	0.411378	-0.105035	NA
a107314;13	417	53	11	7	7.85604e-08	3.20466e-07	-2.20383	2.76975e-12	2.10758e-11	-3.17244	NA
a107315;12	453	14	12	43	0.394976	0.415062	-0.157733	0.000598803	0.0014966	1.36703	Nance-Horan syndrome (congenital cataracts and dental anomalies) [Bos taurus]
a107317;10	460	16	21	23	0.171231	0.208843	0.456977	0.289739	0.3284	0.271685	NA
a10731;71	2594	806	744	1007	0.244481	0.281762	-0.050818	0.155136	0.196807	0.0693352	smoothelin-like [Bos taurus]
a107320;13	468	40	31	8	0.192073	0.230162	-0.303073	4.41778e-08	2.14748e-07	-2.5738	NA
a107325;16	326	24	8	30	0.00336144	0.00639257	-1.5203	0.436516	0.451789	0.0700513	NA
a107327;18	474	56	20	37	3.36215e-05	9.38707e-05	-1.42077	0.00246865	0.00536409	-0.849778	NA
a107329;13	320	32	2	22	3.65606e-08	1.54989e-07	-3.93534	0.0228021	0.0383264	-0.792445	NA
a107335;10	500	18	16	12	0.419237	0.436532	-0.105266	0.05858	0.0866927	-0.836839	NA
a107338;10	348	14	14	13	0.451562	0.463305	0.0646592	0.256477	0.298859	-0.358792	PREDICTED: hypothetical protein isoform 4 [Bos taurus]
a10733;82	7083	2946	1799	3663	1.8664e-52	4.5271e-51	-0.646903	0.0403001	0.0628121	0.0623915	PREDICTED: collagen alpha-1(XIV) chain [Sus scrofa]
a107349;13	728	33	30	73	0.422833	0.439791	-0.0728443	0.00126329	0.00293458	0.893554	teneurin-4 [Rattus norvegicus]
a107351;13	331	7	16	37	0.0248598	0.038697	1.2573	2.29108e-05	7.59231e-05	2.15022	NA
a107353;14	393	28	5	44	3.30046e-05	9.23242e-05	-2.42077	0.128322	0.168647	0.4002	NA
a107356;14	346	24	2	33	4.71227e-06	1.51527e-05	-3.5203	0.302501	0.33994	0.207555	NA
a107357;12	349	28	6	12	9.79675e-05	0.000250219	-2.15773	0.00102403	0.00242958	-1.47427	NA
a107359;11	335	10	20	14	0.0266936	0.0412898	1.06466	0.359524	0.389624	0.23355	NA
a10735;128	2621	1654	1172	1876	1.4056e-15	1.27451e-14	-0.432327	0.0745003	0.10631	-0.0701762	MLLT1 [Bos taurus]
a107362;14	815	40	67	52	0.00224052	0.00442687	0.80882	0.343351	0.37592	0.126635	NA
a10736;138	326	128	109	290	0.187814	0.226273	-0.167156	1.94398e-10	1.20943e-09	0.928032	chromodomain-helicase-DNA-binding protein 3 isoform 3 [Homo sapiens]
a107371;16	352	15	19	36	0.209377	0.247189	0.405696	0.00995781	0.0184747	1.01116	PREDICTED: hypothetical protein LOC100522891 [Sus scrofa]
a107376;18	384	25	40	17	0.0209717	0.0332855	0.742731	0.0362787	0.0574615	-0.80827	MEX3A protein-like [Bos taurus]
a107378;11	412	10	21	25	0.0185062	0.0297741	1.13505	0.0219666	0.0371356	1.07005	NA
a107381;10	1109	48	47	56	0.452975	0.464251	0.0342856	0.454355	0.465865	-0.0294843	interleukin-1 receptor-associated kinase-like 2 [Bos taurus]
a107382;11	304	17	12	13	0.215088	0.252862	-0.437841	0.113748	0.152508	-0.6389	NA
a107388;18	383	35	19	36	0.0225324	0.0355056	-0.816696	0.265979	0.307382	-0.211235	NA
a107394;9	845	26	59	27	7.0357e-05	0.000184516	1.24686	0.305702	0.342983	-0.197429	NA
a10739;136	391	477	132	85	6.04901e-44	1.28956e-42	-1.78879	1.58806e-83	5.24209e-82	-2.74033	NA
a1073;838	891	4038	2046	3968	5.00585e-128	1.96545e-126	-0.916176	4.37772e-18	5.2741e-17	-0.277106	mCG146274 [Mus musculus]
a107400;7	976	43	36	17	0.280485	0.315361	-0.191681	2.52187e-05	8.31421e-05	-1.59068	Thrombospondin type-1 domain-containing protein 7A-like [Bos taurus]
a107417;12	447	55	0	16	4.79973e-17	4.74257e-16	0/unlimited	2.62203e-08	1.30538e-07	-2.03324	NA
a10741;99	2002	654	1024	1141	4.96048e-13	3.5564e-12	0.711512	5.0171e-13	4.30596e-12	0.55106	Chromosome 7 open reading frame 26 ortholog [Bos taurus]
a107422;13	322	15	4	30	0.00778415	0.0137141	-1.84223	0.0505406	0.0764337	0.748123	NA
a107423;14	685	92	22	10	3.40128e-11	1.92404e-10	-1.99947	1.23029e-21	1.69223e-20	-3.45351	PREDICTED: DENN/MADD domain containing 4C [Bos taurus]
a107425;15	330	7	46	10	5.4141e-06	1.72648e-05	2.78087	0.370253	0.398835	0.262696	PREDICTED: similar to hCG1987119 [Equus caballus]
a107426;11	444	20	20	28	0.442608	0.456182	0.0646592	0.29747	0.335183	0.23355	NA
a107430;13	630	53	24	31	0.00089295	0.00191273	-1.0783	0.000684514	0.00168413	-1.0256	NA
a107437;16	753	49	23	93	0.00196799	0.00392607	-1.02649	0.0037581	0.00781252	0.672572	polymerase (DNA directed), epsilon [Bos taurus]
a107439;16	440	24	25	39	0.381925	0.403484	0.123553	0.118008	0.157109	0.448563	NA
a10743;24	468	48	27	52	0.0129651	0.0216923	-0.765416	0.315326	0.351888	-0.1364	NA
a107443;11	840	40	14	76	0.000327511	0.000757966	-1.44991	0.00782339	0.0149205	0.674123	NA
a107446;10	500	11	12	47	0.376638	0.400574	0.19019	1.33703e-05	4.62595e-05	1.84328	NA
a107447;11	490	17	18	36	0.381455	0.403343	0.147121	0.024208	0.0404342	0.830585	NA
a107448;8	307	14	8	5	0.126005	0.160706	-0.742696	0.00756803	0.0144855	-1.7373	NA
a10744;89	1281	434	470	645	0.0306734	0.0467023	0.179625	0.000167617	0.000469921	0.319727	cell adhesion molecule 4 [Bos taurus]
a10745;187	898	1130	378	850	2.261e-80	7.22549e-79	-1.51521	1.19224e-24	1.82091e-23	-0.662665	SCAN domain-containing protein 1 [Bos taurus]
a107461;12	364	7	33	19	1.21841e-05	3.68226e-05	2.3017	0.0291008	0.0473773	1.1887	NA
a107464;18	469	25	24	60	0.4928	0.493936	0.00576556	0.00122891	0.00286013	1.01116	PREDICTED: hypothetical protein [Bos taurus]
a10746;90	949	619	240	363	3.62438e-36	6.66251e-35	-1.30225	3.8314e-28	6.46037e-27	-1.02185	ubiquitin-conjugating enzyme E2B, RAD6 homolog (S. cerevisiae), isoform CRA_a [Rattus norvegicus]
a107473;12	436	36	9	12	3.80359e-05	0.000105286	-1.93534	2.06172e-05	6.89434e-05	-1.83684	NA
a107478;11	338	6	18	21	0.00535943	0.00976625	1.64962	0.00716698	0.0138278	1.55548	NA
a107479;12	366	10	22	23	0.0126852	0.021291	1.20216	0.0402643	0.0627692	0.949757	sperm associated antigen 8 [Bos taurus]
a107480;10	422	20	23	10	0.273918	0.309152	0.266293	0.0109079	0.0199584	-1.25188	PREDICTED: paired box protein Pax-9-like [Ailuropoda melanoleuca]
a107486;15	561	29	40	44	0.06633	0.0922188	0.528606	0.15903	0.200767	0.349574	kinesin-like protein KIF2C [Bos taurus]
a107487;11	408	15	24	20	0.0584291	0.0824808	0.742731	0.379441	0.406419	0.163161	NA
a10748;69	370	95	91	89	0.494245	0.495112	0.00259828	0.0516227	0.0779322	-0.345999	iroquois homeobox protein 1-like [Bos taurus]
a107492;14	426	52	6	22	2.49077e-10	1.30581e-09	-3.05082	1.02738e-05	3.61676e-05	-1.49288	NA
a107493;11	604	41	23	26	0.0194981	0.0311779	-0.769331	0.00547214	0.0108966	-0.908989	NA
a107494;14	543	49	13	32	3.45102e-06	1.13099e-05	-1.84961	0.00375952	0.00781399	-0.866587	NA
a107495;10	473	21	8	31	0.0111735	0.0189821	-1.32766	0.229606	0.273106	0.310002	NA
a107499;14	563	54	19	42	3.79447e-05	0.000105099	-1.4423	0.0187626	0.0322914	-0.614447	PREDICTED: hypothetical protein [Bos taurus]
a10749;125	2575	982	1599	1954	0	0	0.768034	8.73968e-13	7.24088e-12	0.740759	procollagen-lysine,2-oxoglutarate 5-dioxygenase 3 [Bos taurus]
a107505;15	375	7	23	40	0.00111678	0.00233844	1.78087	7.68203e-06	2.75642e-05	2.2627	Myb protein P42POP-like [Bos taurus]
a107512;13	459	11	36	31	6.09069e-05	0.000161365	1.77515	0.00553084	0.0109932	1.24289	NA
a107513;11	318	9	27	19	0.000817353	0.00175978	1.64962	0.080388	0.113673	0.826126	NA
a107514;14	352	24	14	23	0.0712342	0.0977437	-0.712948	0.22611	0.26963	-0.313277	NA
a10751;102	6355	3299	2372	3453	8.46284e-27	1.21437e-25	-0.411266	5.99455e-08	2.87035e-07	-0.186055	SET domain containing 5 [Bos taurus]
a107520;15	1098	62	71	92	0.149845	0.18643	0.26021	0.0912574	0.126389	0.317489	kinesin family member 26B-like [Bos taurus]
a107529;12	467	13	22	32	0.0505998	0.0725102	0.823651	0.0120955	0.0219219	1.04768	PREDICTED: regulation of nuclear pre-mRNA domain-containing protein 2-like, partial [Callithrix jacchus]
a107532;15	726	79	26	38	2.37831e-07	9.10151e-07	-1.53868	9.99374e-07	4.07854e-06	-1.30773	NA
a107536;13	334	38	6	17	5.65359e-07	2.06348e-06	-2.59831	0.000245044	0.000664224	-1.41234	family with sequence similarity 98, member B, isoform CRA_c [Homo sapiens]
a10753;91	1233	532	640	331	4.38006e-05	0.000119436	0.331305	2.1181e-21	2.89635e-20	-0.936472	RNA-binding protein with multiple splicing isoform A [Homo sapiens]
a107541;13	731	29	45	56	0.02035	0.0323846	0.698531	0.016559	0.0288743	0.697497	NA
a107543;10	571	26	12	34	0.0168889	0.0273923	-1.05082	0.36625	0.395347	0.135146	NA
a107547;11	325	7	11	24	0.154968	0.191353	0.716736	0.00476694	0.0096252	1.52573	NA
a107552;14	602	19	24	70	0.183403	0.221532	0.401694	1.111e-06	4.50564e-06	1.62948	NA
a107557;14	417	13	24	34	0.0267245	0.0413161	0.949182	0.00653373	0.0127606	1.13515	NA
a107559;14	319	25	16	18	0.106423	0.138859	-0.579197	0.0508278	0.0768113	-0.725808	NA
a10755;61	3916	1023	1005	1363	0.270972	0.307027	0.0390486	0.00326679	0.00688987	0.162103	N-acetyltransferase 10 [Bos taurus]
a107561;9	546	24	10	33	0.0118415	0.0200355	-1.19838	0.302501	0.33994	0.207555	lactation elevated protein 1 [Bos taurus]
a10756;75	2742	615	1038	1125	2.07501e-13	1.58274e-12	0.819807	0	0	0.61939	PREDICTED: LOW QUALITY PROTEIN: membrane-associated phosphatidylinositol transfer protein 1-like [Sus scrofa]
a107572;10	598	44	20	22	0.00233265	0.0045979	-1.07284	0.000311677	0.000825792	-1.25188	NA
a107573;14	826	49	64	41	0.0499471	0.0716387	0.449949	0.0471758	0.0719811	-0.509035	NA
a107583;13	466	30	12	29	0.00418691	0.00782753	-1.25727	0.209674	0.252796	-0.300786	NA
a107584;16	343	5	31	38	1.74111e-05	5.10963e-05	2.69693	9.90306e-06	3.49363e-05	2.67412	NA
a107588;16	393	43	7	33	1.38127e-07	5.465e-07	-2.55425	0.0282211	0.0462016	-0.633747	sugarbabe-like [Bos taurus]
a10758;169	1360	1308	1224	813	0.294117	0.328395	-0.0310997	7.0658e-50	1.77887e-48	-0.937912	class V alcohol dehydrogenase [Bos taurus]
a107596;11	654	35	27	40	0.203379	0.241536	-0.309736	0.424931	0.443071	-0.0592317	PREDICTED: hypothetical protein [Bos taurus]
a107597;11	501	16	33	25	0.00491331	0.00902277	1.10905	0.204529	0.247577	0.391979	B-cell antigen receptor complex-associated protein alpha chain [Bos taurus]
a107599;14	320	17	6	28	0.0149895	0.0246362	-1.43784	0.150184	0.192037	0.468015	PREDICTED: similar to solute carrier family 38, member 4 isoform 4 [Canis familiaris]
a10759;103	2548	1099	1057	1557	0.445733	0.458282	0.00844323	4.78044e-06	1.77011e-05	0.250701	G-protein signaling modulator 1 [Bos taurus]
a1075;1390	889	3442	7088	6525	0	0	1.10679	3.18479e-12	2.40403e-11	0.670854	glutathione peroxidase 1 [Bos taurus]
a107601;9	684	31	24	30	0.221533	0.258877	-0.304575	0.207082	0.250229	-0.299182	PREDICTED: similar to CXXC finger 6 [Canis familiaris]
a107602;12	361	3	36	20	3.92571e-05	0.000108221	3.64962	0.000653218	0.00161897	2.48509	NA
a10760;86	627	154	182	320	0.0263574	0.0407974	0.305667	2.96011e-09	1.63807e-08	0.803265	NA
a107611;14	442	28	36	16	0.120317	0.154483	0.427229	0.00860112	0.0162513	-1.05923	NA
a107613;15	538	48	22	30	0.00168991	0.00341655	-1.06087	0.00249534	0.00541513	-0.929949	hypothetical protein LOC100124497 [Bos taurus]
a107618;12	636	51	24	31	0.00167342	0.00338662	-1.0228	0.00135636	0.00312594	-0.970106	NA
a10761;79	2645	1038	905	1028	0.0211815	0.033586	-0.133158	1.41463e-05	4.87469e-05	-0.265843	ephexin-1 [Bos taurus]
a107620;13	507	19	29	35	0.0561147	0.0795556	0.674713	0.0635298	0.0928611	0.629479	NA
a107623;10	658	26	49	7	0.00218132	0.00432007	0.978929	6.01131e-05	0.000183485	-2.14496	hypothetical protein CRE_14428 [Caenorhabditis remanei]
a107629;9	389	6	12	14	0.06946	0.0959417	1.06466	0.0866343	0.121182	0.970516	solute carrier family 13 member 4 [Bos taurus]
a107634;13	515	45	8	28	1.6143e-07	6.34025e-07	-2.42719	0.00313146	0.00665043	-0.936375	NA
a107635;15	506	60	12	26	7.14283e-09	3.25985e-08	-2.25727	3.42551e-06	1.29891e-05	-1.45833	NA
a107639;11	721	36	66	16	0.000683504	0.00148939	0.939128	0.000325914	0.000857684	-1.4218	NA
a10763;94	3205	1138	1453	1687	1.31217e-12	8.9021e-12	0.417193	4.64569e-09	2.52699e-08	0.316083	F-box protein 42 [Bos taurus]
a107643;14	338	8	30	24	8.89658e-05	0.000229195	1.97155	0.00952909	0.0177716	1.33309	NA
a10764;104	4207	1590	1832	2799	2.53755e-08	1.09544e-07	0.269052	8.79297e-13	7.28012e-12	0.564008	general transcription factor 3C polypeptide 1 [Bos taurus]
a107655;10	316	12	10	22	0.379372	0.402406	-0.198375	0.118466	0.157248	0.622592	NA
a107661;11	921	56	39	34	0.0644288	0.0898413	-0.457293	0.000823697	0.00199356	-0.971769	RecName: Full=Regulator of microtubule dynamics protein 2; Short=RMD-2; AltName: Full=Protein FAM82A1
a107664;14	357	10	11	46	0.374988	0.399446	0.202163	8.3389e-06	2.97419e-05	1.94976	unnamed protein product [Mus musculus]
a107668;16	351	18	18	36	0.445425	0.458153	0.0646592	0.0356687	0.0566588	0.748123	proproteinase E [Bos taurus]
a10766;80	883	315	321	359	0.210847	0.248647	0.0918807	0.283819	0.322812	-0.0632447	ATP synthase subunit s, mitochondrial precursor [Bos taurus]
a107673;16	318	20	17	30	0.36435	0.390903	-0.169806	0.217909	0.26103	0.333086	NA
a107688;11	482	33	25	10	0.192407	0.230498	-0.335879	1.91018e-05	6.4239e-05	-1.97434	hypoxia-inducible protein 2 [Bos taurus]
a10768;74	3904	1079	1144	1791	0.00744153	0.0131574	0.149051	1.66989e-12	1.32027e-11	0.479194	amyloid beta A4 precursor protein-binding family B member 3 [Bos taurus]
a107694;12	303	15	1	26	0.000191816	0.000465173	-3.84223	0.127281	0.167444	0.541672	NA
a107696;12	305	0	16	34	5.19026e-06	1.66087e-05	0/unlimited	5.40756e-10	3.22438e-09	0/unlimited	Histidine-rich glycoprotein precursor [Brugia malayi]
a107698;11	608	23	38	26	0.0183898	0.0296033	0.789025	0.422364	0.441064	-0.074999	solute carrier family 39 (metal ion transporter), member 5 [Bos taurus]
a10769;72	2178	1254	588	332	1.79592e-49	4.15898e-48	-1.02799	4.47274e-164	1.80075e-162	-2.16916	NA
a1076;1208	2006	12848	5950	14991	0	0	-1.04592	0.045432	0.0697135	-0.0293239	RecName: Full=RNA-binding protein FUS; AltName: Full=Protein pigpen
a107702;14	356	41	4	20	5.93328e-09	2.72888e-08	-3.29289	0.00036976	0.00096176	-1.2875	NA
a107705;18	419	58	32	12	0.00571439	0.0103683	-0.793322	8.18868e-11	5.28704e-10	-2.5249	NA
a107708;13	341	11	29	15	0.00137023	0.00282335	1.46321	0.377335	0.40495	0.195582	NA
a107709;17	408	32	38	22	0.183784	0.221921	0.312587	0.0228021	0.0383264	-0.792445	NA
a10770;202	1406	1072	1365	1605	2.11042e-12	1.38231e-11	0.413255	2.6045e-09	1.44912e-08	0.330392	inhibin beta B subunit [Ovis aries]
a107719;14	489	6	51	36	9.22563e-06	2.84362e-05	3.15212	1.54118e-05	5.28076e-05	2.33309	PREDICTED: RNA-binding protein Nova-2-like [Sus scrofa]
a10771;105	1603	797	618	903	4.41054e-05	0.00012024	-0.302314	0.152706	0.194236	-0.0717305	5'-AMP-activated protein kinase subunit gamma-1 [Bos taurus]
a107724;11	335	9	7	30	0.348482	0.377054	-0.297911	0.00213006	0.0047001	1.48509	PREDICTED: transcription factor E2F2-like [Ailuropoda melanoleuca]
a107727;13	344	8	29	10	0.000143988	0.000358015	1.92264	0.471135	0.47846	0.0700513	PREDICTED: similar to sperm associated antigen 4 isoform 2 [Canis familiaris]
a107728;11	419	17	24	16	0.110059	0.143134	0.562159	0.247119	0.290039	-0.33934	NA
a10772;65	1279	557	200	396	7.96788e-37	1.48414e-35	-1.41302	1.21936e-15	1.30116e-14	-0.744054	NA
a107734;12	390	19	12	30	0.133101	0.168331	-0.598306	0.17288	0.216383	0.407086	unc-5 homolog C [Bos taurus]
a107738;14	309	0	42	14	4.30767e-14	3.54383e-13	0/unlimited	0.000106765	0.000310788	0/unlimited	NA
a10773;107	2927	1295	1311	1718	0.0724737	0.0993404	0.0823748	0.00163852	0.0037117	0.155901	PREDICTED: retrograde Golgi transport protein RGP1 homolog, partial [Sus scrofa]
a107747;11	461	34	11	23	0.000461472	0.0010403	-1.56337	0.0173095	0.0300475	-0.815778	hepatic lipase [Bos grunniens]
a107748;13	396	23	22	18	0.497756	0.498096	0.000528907	0.0902181	0.125459	-0.605514	NA
a10774;149	1314	1306	606	818	1.23778e-52	3.00828e-51	-1.04311	7.35658e-49	1.82865e-47	-0.926859	RAB13 protein [Homo sapiens]
a107753;11	471	24	8	25	0.00336144	0.00639257	-1.5203	0.316087	0.352421	-0.192983	NA
a107757;12	432	44	12	13	1.37585e-05	4.12507e-05	-1.80981	6.98664e-07	2.90995e-06	-2.01087	NA
a10775;112	2357	1230	966	1469	2.21622e-06	7.48925e-06	-0.283904	0.470167	0.478159	0.00429933	G protein-coupled receptor 153-like [Bos taurus]
a107762;13	382	41	7	17	3.95487e-07	1.47202e-06	-2.48554	6.38092e-05	0.000194109	-1.52197	NA
a107765;14	398	24	20	25	0.328339	0.359276	-0.198375	0.316087	0.352421	-0.192983	PREDICTED: zinc finger protein 45-like [Sus scrofa]
a107771;15	763	25	70	52	4.88809e-07	1.80027e-06	1.55009	0.0101006	0.0186793	0.804707	NA
a107778;13	376	49	4	13	5.27842e-11	2.93952e-10	-3.55005	4.4662e-08	2.16823e-07	-2.16615	NA
a10777;137	653	263	575	382	2.10831e-13	1.60726e-12	1.19316	0.00646049	0.0126254	0.286633	leukotriene C4 synthase [Bos taurus]
a107783;14	465	6	52	22	9.2256e-06	2.84396e-05	3.18014	0.00483934	0.00974594	1.62259	NA
a107789;12	384	15	13	33	0.401772	0.421366	-0.141792	0.0231788	0.0388997	0.885627	mesothelin [Bos taurus]
a10778;41	2639	849	179	449	6.17036e-99	2.17883e-97	-2.18115	8.84231e-47	2.129e-45	-1.17093	NA
a107792;12	478	38	12	24	0.000182227	0.000443649	-1.59831	0.00690353	0.0134085	-0.914842	NA
a107795;18	396	27	45	29	0.0105446	0.0180162	0.801625	0.345771	0.378051	-0.148783	transmembrane and coiled-coil domains protein 2 [Bos taurus]
a107807;14	420	39	30	9	0.187261	0.22579	-0.313852	2.4648e-07	1.09024e-06	-2.36735	NA
a107809;10	574	30	30	19	0.430252	0.445813	0.0646592	0.0147117	0.026119	-0.91084	NA
a10780;67	3134	1056	935	921	0.0434515	0.0634929	-0.110912	2.30166e-12	1.7798e-11	-0.449214	PREDICTED: hypothetical protein LOC100423740 [Macaca mulatta]
a107811;14	801	28	56	65	0.000541704	0.0012066	1.06466	0.00121985	0.00284545	0.963136	NA
a107813;12	320	12	11	28	0.46315	0.471365	-0.0608716	0.0242012	0.0404345	0.970516	NA
a107829;10	476	35	17	10	0.00987692	0.0169711	-0.977161	6.43865e-06	2.34011e-05	-2.05923	synaptotagmin-like protein 2 isoform c [Homo sapiens]
a107832;12	448	25	14	38	0.0542404	0.0773336	-0.771842	0.175852	0.219686	0.352195	NA
a107839;15	361	20	18	28	0.429039	0.44488	-0.0873438	0.29747	0.335183	0.23355	lysophosphatidylcholine acyltransferase 2 [Bos taurus]
a107848;14	386	19	8	38	0.0237188	0.0370701	-1.18327	0.0318203	0.0511897	0.748123	PREDICTED: UHRF1-binding protein 1-like [Ailuropoda melanoleuca]
a107854;15	409	32	13	38	0.00359434	0.00681122	-1.2349	0.489966	0.492231	-0.00394924	NA
a107855;12	384	34	4	23	3.34343e-07	1.2586e-06	-3.0228	0.0173095	0.0300475	-0.815778	zinc finger protein 184 [Bos taurus]
a107865;13	402	26	12	32	0.0168889	0.0273923	-1.05082	0.456678	0.467661	0.0476835	PREDICTED: late secretory pathway protein AVL9 homolog [Callithrix jacchus]
a107870;12	314	16	17	13	0.381061	0.4033	0.152122	0.151891	0.193575	-0.551437	NA
a107875;12	926	28	58	83	0.000276127	0.000652105	1.11529	5.2743e-06	1.93793e-05	1.31581	protocadherin alpha 3 [Bos taurus]
a107876;10	437	8	28	16	0.000232858	0.000557411	1.87201	0.120482	0.159553	0.748123	NA
a107878;14	424	39	14	22	0.00048308	0.00108555	-1.41339	0.00214116	0.00472057	-1.07785	NA
a107883;16	316	16	21	26	0.171231	0.208843	0.456977	0.169268	0.212365	0.448563	NA
a107886;13	311	4	28	22	2.81381e-05	7.95927e-05	2.87201	0.000777771	0.00189234	2.20755	NA
a107888;11	336	1	6	45	0.0307992	0.0468648	2.64962	0.000292737	0.000782491	5.23998	NA
a10788;145	976	442	787	674	0	0	0.896977	2.3996e-05	7.93267e-05	0.356825	ankyrin repeat domain 10, isoform CRA_d [Mus musculus]
a107895;14	367	35	3	26	3.75751e-08	1.59036e-07	-3.47966	0.0334271	0.0535038	-0.68072	NA
a107896;9	1013	54	14	58	8.64784e-07	3.07968e-06	-1.88287	0.290121	0.32875	-0.148783	NA
a107897;12	402	39	2	20	4.77648e-10	2.43448e-09	-4.22074	0.000830586	0.00200845	-1.21535	NA
a10789;90	4422	1671	1835	2184	2.09486e-05	6.08776e-05	0.199728	0.00205817	0.00455929	0.134384	microfibrillar-associated protein 3-like [Bos taurus]
a107900;12	1157	44	71	68	0.0029127	0.00561494	0.754975	0.0900907	0.125335	0.376154	NA
a107901;11	411	16	30	18	0.0136478	0.0226727	0.97155	0.427735	0.445574	-0.0819517	NA
a107902;10	535	59	0	12	3.27785e-18	3.4336e-17	0/unlimited	4.47129e-11	2.97166e-10	-2.54956	PREDICTED: hypothetical protein [Bos taurus]
a107907;15	948	70	91	48	0.026391	0.0408481	0.443171	0.00147296	0.00337071	-0.796197	cell death-inducing DFFA-like effector c [Bos taurus]
a107911;13	315	10	7	27	0.271244	0.307218	-0.449914	0.0115836	0.0210778	1.18108	NA
a107912;9	612	10	21	45	0.0185062	0.0297741	1.13505	1.25609e-05	4.36142e-05	1.91805	NA
a10791;113	324	89	115	270	0.0162383	0.02647	0.434416	0	0	1.34921	PREDICTED: predicted protein-like [Bos taurus]
a107920;15	532	74	12	26	5.49218e-12	3.40033e-11	-2.55983	4.8891e-09	2.64664e-08	-1.76089	NA
a107921;10	332	7	21	9	0.00284308	0.00549746	1.64962	0.452744	0.46447	0.110693	NA
a107927;11	368	29	2	18	2.29494e-07	8.80063e-07	-3.79332	0.0139808	0.0249427	-0.939933	NA
a10792;170	492	552	193	342	6.25473e-38	1.19681e-36	-1.45141	2.34874e-22	3.31034e-21	-0.942549	NA
a107932;15	450	25	19	33	0.228696	0.266209	-0.331269	0.355561	0.386565	0.148661	NA
a107939;10	444	6	25	28	0.000176888	0.000431614	2.12355	0.000402326	0.00103945	1.97052	NA
a10793;190	577	371	508	586	6.08229e-08	2.50924e-07	0.518069	8.91444e-06	3.1683e-05	0.407605	zinc finger protein 771 [Bos taurus]
a107948;11	753	15	70	32	5.23467e-08	2.17637e-07	2.28705	0.0302871	0.0490542	0.841233	NA
a107949;18	500	23	29	68	0.161704	0.198607	0.399078	3.56981e-05	0.000114099	1.31202	NA
a10794;96	1202	529	623	574	0.000207476	0.000500015	0.300624	0.0613427	0.0900999	-0.134094	NA
a107950;12	438	17	6	46	0.0149895	0.0246362	-1.43784	0.00134382	0.00310199	1.18422	mCG145561, isoform CRA_b [Mus musculus]
a107957;12	881	53	25	65	0.00142346	0.00292677	-1.01941	0.441158	0.455442	0.0425706	NA
a107960;15	530	78	10	24	4.3275e-14	3.55835e-13	-2.89881	1.29886e-10	8.20071e-10	-1.95232	NA
a107961;14	473	36	15	40	0.002641	0.00515132	-1.19838	0.377481	0.404969	-0.0998737	NA
a107963;16	405	17	26	42	0.0657842	0.0915079	0.677636	0.0045762	0.00930779	1.05298	NA
a107966;14	463	25	32	35	0.137827	0.17352	0.420803	0.274371	0.314722	0.23355	PREDICTED: cAMP-specific 3',5'-cyclic phosphodiesterase 7B [Sus scrofa]
a107970;9	350	20	5	13	0.00179388	0.00360177	-1.93534	0.0433475	0.0669995	-0.873365	PREDICTED: zinc finger protein 295 [Equus caballus]
a107979;12	415	22	21	22	0.499604	0.499701	-0.00245495	0.278107	0.317159	-0.251877	NA
a107983;12	597	40	24	25	0.0350079	0.0524116	-0.672306	0.00520997	0.010425	-0.929949	NA
a107990;12	321	9	24	16	0.00307364	0.00588753	1.4797	0.175919	0.219663	0.578198	NA
a107995;11	1005	98	16	37	2.69536e-15	2.40886e-14	-2.55005	1.2527e-10	7.93118e-10	-1.65713	transmembrane protein 5 [Bos taurus]
a107996;16	314	3	32	35	3.93099e-05	0.000108315	3.4797	2.81534e-05	9.18555e-05	3.29244	NA
a107998;9	401	36	3	2	2.07187e-08	9.01463e-08	-3.5203	5.72098e-11	3.75196e-10	-4.4218	NA
a10799;130	787	615	363	461	6.71788e-14	5.4191e-13	-0.695958	1.98474e-14	1.98506e-13	-0.667696	PREDICTED: O-6-methylguanine-DNA methyltransferase-like isoform 1 [Bos taurus]
a108001;12	430	7	32	30	1.69762e-05	4.9887e-05	2.2573	0.000431259	0.00110686	1.84766	transmembrane protein C16orf54 homolog [Bos taurus]
a10800;27	421	90	8	22	1.85933e-18	1.97335e-17	-3.42719	2.77762e-14	2.75229e-13	-2.2843	NA
a108012;10	398	51	0	2	7.0282e-16	6.48832e-15	0/unlimited	8.49112e-16	9.12819e-15	-4.9243	NA
a108014;14	800	135	4	13	2.10899e-34	3.71288e-33	-5.01216	3.13446e-32	5.83176e-31	-3.62825	ankyrin repeat domain 12 isoform 2 [Bos taurus]
a108024;12	497	22	28	35	0.158561	0.195337	0.412583	0.14724	0.189147	0.417975	NA
a108026;10	468	21	25	18	0.230525	0.268198	0.316198	0.15179	0.193539	-0.474269	sarcoplasmic reticulum glycoprotein-like [Bos taurus]
a10802;110	763	569	308	281	1.05465e-16	1.02315e-15	-0.820839	3.88643e-36	7.85894e-35	-1.26974	NA
a108030;16	344	10	53	2	1.00911e-06	3.56702e-06	2.47065	0.00474585	0.00960116	-2.5738	NA
a10803;119	1519	800	630	1049	0.000129912	0.000325728	-0.279989	0.0199749	0.034138	0.139066	RCE1 protein [Homo sapiens]
a10804;198	700	773	523	581	3.666e-10	1.89086e-09	-0.498998	1.66767e-17	1.95216e-16	-0.663807	brain protein I3 [Bos taurus]
a108051;15	377	31	14	28	0.00863832	0.0150332	-1.08218	0.143324	0.185224	-0.398718	NA
a108054;11	327	14	4	25	0.0123859	0.02084	-1.7427	0.115827	0.154871	0.584625	NA
a108055;14	516	44	13	42	3.09071e-05	8.67086e-05	-1.69433	0.151418	0.193168	-0.318991	PREDICTED: activating transcription factor 6 [Equus caballus]
a108057;11	601	77	4	8	1.96279e-18	2.0818e-17	-4.20213	1.1978e-18	1.47823e-17	-3.51866	NA
a10805;86	792	223	324	300	6.18261e-07	2.24406e-06	0.603609	0.0842343	0.118347	0.176042	PREDICTED: zinc finger protein 729-like [Callithrix jacchus]
a10806;98	3476	1080	1627	2148	2.31792e-12	1.50597e-11	0.655842	3.02713e-12	2.2896e-11	0.740086	ubiquitin carboxyl-terminal hydrolase 20 [Bos taurus]
a108070;11	704	9	27	70	0.000817353	0.00175978	1.64962	6.41467e-07	2.68607e-06	2.70748	NA
a108071;11	383	12	7	23	0.154336	0.19075	-0.712948	0.093118	0.128241	0.686723	NA
a108074;12	408	42	2	16	7.31163e-11	4.02142e-10	-4.32766	2.04359e-05	6.83744e-05	-1.64419	NA
a108078;14	923	54	73	46	0.0264955	0.0410079	0.499596	0.046993	0.071758	-0.483202	NA
a10807;73	1214	439	301	367	3.80944e-06	1.24211e-05	-0.479798	2.65275e-07	1.1689e-06	-0.510318	similar to RIKEN cDNA 2810405J04 [Rattus norvegicus]
a108081;15	724	37	42	74	0.223742	0.261288	0.247523	0.0044987	0.00916648	0.748123	RasGEF domain family, member 1A, isoform CRA_a [Homo sapiens]
a108097;13	363	29	8	24	0.000388171	0.000885934	-1.79332	0.092778	0.128004	-0.524895	NA
a10809;76	875	305	266	379	0.136719	0.17222	-0.132724	0.291246	0.329823	0.0615119	NA
a108107;16	333	23	28	18	0.196265	0.234405	0.348452	0.0902181	0.125459	-0.605514	NA
a108109;10	1015	59	27	64	0.000555159	0.00123464	-1.0631	0.300061	0.337742	-0.13452	RWD domain containing 2B-like [Bos taurus]
a108112;13	732	65	29	31	0.000215243	0.000517616	-1.09973	7.10349e-06	2.56362e-05	-1.32005	NA
a108113;14	500	36	28	29	0.208641	0.246753	-0.297911	0.0579013	0.0858539	-0.563821	NA
a10811;174	962	802	556	1005	2.21309e-09	1.06207e-08	-0.463858	0.140969	0.182406	0.0736446	DNA-binding protein inhibitor ID-3 [Ovis aries]
a108125;13	774	57	17	65	2.73054e-06	9.10514e-06	-1.68077	0.402222	0.424959	-0.062399	leucine-rich repeat-containing protein 17 [Bos taurus]
a108126;13	586	48	13	44	5.3936e-06	1.7228e-05	-1.81986	0.104166	0.141631	-0.377408	NA
a10813;164	437	254	244	451	0.478796	0.4824	0.00671189	1.2078e-07	5.5793e-07	0.576422	hCG1820496 [Homo sapiens]
a108143;9	565	24	17	32	0.174969	0.21251	-0.43284	0.344579	0.37708	0.163161	C-type lectin, superfamily member 13-like [Bos taurus]
a10814;83	1162	765	211	380	1.62562e-69	4.76984e-68	-1.79356	2.04991e-47	4.97714e-46	-1.26134	McKusick-Kaufman syndrome [Bos taurus]
a108150;14	742	22	63	59	1.22477e-06	4.28768e-06	1.58251	0.00036119	0.000942764	1.17133	NA
[truncated: 47,117 more rows]
