# Supplementary material for: De Novo Transcriptome Assembly and Differential Gene Expression Profiling of Three Capra hircus Skin Types during Anagen of the Hair Growth Cycle
Source: Int J Genomics. 2013 May 20;2013:269191. doi: 10.1155/2013/269191 (PMC3671518; doi:10.1155/2013/269191)
Supplement: Supplementary file 7 [file 269191.f7.xls]

## Sheet: Sheet1
Table S6. Examining differentially expressed genes using qRT-PCR and comparison with RNA-Seq. Acetyl-CoA carboxylase 1 encoding gene was used as endogenous reference (internal control, IC), because they have the very similar expression level among three samples.
Contig ID	Abbre. Gene Name	Ct mean value in BL	Ct mean value in BK	Ct mean value in BS	△Ct mean value in BL	△Ct mean value in BK	△Ct mean value in BS	-△△Ct between BL and BK	Relative difference fold of BK/ BL (2^-△△Ct)	Relative difference fold of BK/BL(RNA-Seq)	-△△Ct between BL and BS	Relative difference fold of BS/BL (2^-△△Ct)	Relative difference fold of BS/BL(RNA-Seq)
a132791;11	NDC80	25.497	30.995	33.524	-1.547	0.139	2.734	-1.686	0.31	0.2	-4.28	0.05	0.42
a59170;18	XIAP	22.593	27.907	28.933	-4.45	-2.948	-1.857	-1.502	0.35	0.3	-2.593	0.17	0.48
a139222;14	SNX24	24.57	29.947	30.027	-2.473	-0.909	-0.764	-1.564	0.33	0.2	-1.709	0.31	0.28
a54793;21	GNAT2	22.571	27.731	27.734	-4.472	-3.124	-3.057	-1.348	0.39	0.44	-1.415	0.38	0.47
a122442;10	MCM10	24.161	28.855	29.442	-2.882	-2.001	-1.348	-0.882	0.54	0.33	-1.534	0.35	0.48
a74740;15	TIGD1	25.193	30.533	33.028	-1.85	-0.323	2.237	-1.528	0.34	0.25	-4.087	0.06	0.33
a101234;11	PLK4	26.274	31.74	38.243	-0.77	0.885	7.452	-1.655	0.31	0.16	-8.222	0.003	0.37
a65131;18	Cyclin-H	23.22	29.382	28.059	-3.824	-1.473	-2.731	-2.35	0.19	0.4	-1.092	0.46	0.47
a53471;29	CDK7	21.503	27.494	25.569	-5.54	-3.362	-5.221	-2.178	0.22	0.35	-0.319	0.8	0.34
a74481;16	SMC5	21.877	27.659	26.688	-5.167	-3.196	-4.102	-1.97	0.25	0.23	-1.064	0.47	0.26
a7431;102 (IC)	ACACA	27.044	30.855	30.791
